# Supplementary material
Source: PubMed Central journal article supplement (PMC5666684)

# Stereoselective synthesis of macrocyclic peptides via a dual olefin metathesis and ethenolysis approach

Shane L. Mangold and Robert H. Grubbs<sup>\*,†</sup>

<sup>†</sup> Arnold and Mabel Beckman Laboratories for Chemical Synthesis, Division of Chemistry and Chemical Engineering, California Institute of Technology, Pasadena, California 91125, United States and

## Supporting Information

## Table of Contents

|                                                                                           |                |
|-------------------------------------------------------------------------------------------|----------------|
| <b>General Information</b>                                                                | <b>S3-S4</b>   |
| <b>General procedure for the synthesis of allyl-modified amino acids</b>                  | <b>S5</b>      |
| <b>Characterization data of allyl-modified amino acids</b>                                | <b>S4-S8</b>   |
| <b>General procedure for homoallyl modification of amino acids</b>                        | <b>S8</b>      |
| <b>Characterization data for homoallyl modification of amino acids</b>                    | <b>S8-S10</b>  |
| <b>General synthesis of peptides bearing i, i+2 olefin crosslinks</b>                     | <b>S10</b>     |
| <b>Characterization data for peptides bearing i, i+2 olefin crosslinks</b>                | <b>S10-S12</b> |
| <b>General synthesis of peptides bearing i, i+3 olefin crosslinks</b>                     | <b>S12</b>     |
| <b>Characterization data for peptides bearing i, i+3 olefin crosslinks</b>                | <b>S12-S16</b> |
| <b>General procedure for RCM on peptides bearing i, i+2 and i, i+3 olefin crosslinks</b>  | <b>S17</b>     |
| <b>Characterization data for macrocyclic peptides bearing i, i+2 or i, i+3 crosslinks</b> | <b>S17-S20</b> |
| <b>General procedure for Z-selective ethenolysis on macrocyclic peptides 8a-c, 15-18</b>  | <b>S20</b>     |
| <b>Characterization data for ethenolysis of macrocyclic peptides 8a-c, 15-18</b>          | <b>S21-S27</b> |
| <b>Solid-phase synthesis of olefin-containing peptides</b>                                | <b>S28</b>     |
| <b>General procedure for RCM on resin-bound olefinic peptides</b>                         | <b>S29</b>     |
| <b>Monitoring the conversion of RCM on resin-bound olefinic peptides</b>                  | <b>S29</b>     |
| Conversion of peptide <b>21</b> to macrocycle <b>27</b>                                   | <b>S30</b>     |
| Conversion of peptide <b>22</b> to macrocycle <b>28</b>                                   | <b>S31</b>     |
| Conversion of peptide <b>23</b> to macrocycle <b>29</b>                                   | <b>S32</b>     |
| Conversion of peptide <b>25</b> to macrocycle <b>31</b>                                   | <b>S33</b>     |

|                                                                                    |                |
|------------------------------------------------------------------------------------|----------------|
| <b>General procedure for Z-selective ethenolysis on resin-bound peptides 26-31</b> | <b>S34</b>     |
| <b>Characterization data for ethenolysis on peptides 26-31</b>                     | <b>S35-S40</b> |
| <b>MALDI-TOF characterization data of peptides</b>                                 | <b>S41</b>     |
| Macrocycle <b>26</b>                                                               | S42            |
| Macrocycle <b>27</b>                                                               | S42            |
| Macrocycle <b>28</b>                                                               | S43            |
| Macrocycle <b>29</b>                                                               | S43            |
| Macrocycle <b>30</b>                                                               | S44            |
| Macrocycle <b>31</b>                                                               | S44            |
| <b>HPLC traces of macrocyclic peptides</b>                                         | <b>S45</b>     |
| Macrocycle <b>27</b>                                                               | S45            |
| Macrocycle <b>29</b>                                                               | S46            |
| <b>Circular dichroism of <math>\alpha</math>-helical peptides</b>                  | <b>S47</b>     |
| <b>NMR spectra</b>                                                                 | <b>S48-S99</b> |

## General Information

All reactions were carried out in dry glassware under an atmosphere of argon using standard Schlenk line techniques. Ruthenium catalysts **1-3, 5** and cyclometalated ruthenium catalysts **6** and **7** were obtained from Materia, Inc. and used as received. Catalyst **4** was synthesized as previously described.<sup>1</sup> All solvents were purified by passage through solvent purification columns and further degassed by bubbling argon. Ethylene gas was purchased and used as received from Matheson, and was either Ultra high Purity (99.95% or Matheson Purity (99.995%). Commercially available reagents were used as received unless otherwise noted. Solid substrates were used after purification by column chromatography (SiO<sub>2</sub>; (230-400 mesh)). Thin-layer chromatography utilized EMD Sciences silica gel 60 F254 pre-cast glass plates (Cat. No. 1.05714.0001). MBHA resin were purchased from Novabiochem. All Boc-protected or Fmoc-protected amino acids were purchased from ChemImpex or synthesized as described. Fmoc-(S)-2-(4-pentenyl)alanine or Fmoc-(R)-2-(7-octenyl)alanine were synthesized as previously described<sup>2</sup> and confirmed by spectroscopic analysis (NMR). HBTU (N,N,N',N'-tetramethyl-O-(1H-benzotriazol-1-yl)uranium hexafluorophosphate), HATU (1-[Bis(dimethylamino)methylene]-1H-1,2,3-triazolo[4,5-b]pyridinium 3-oxid hexafluorophosphate) and HOBt (1-hydroxybenzotriazole) were purchased from NovaBioChem. N,N'-Diisopropylcarbodiimide (DIC), Piperidine, trifluoroacetic acid (TFA), triisopropylsilane (TIPS), and N,N'-dimethylformamide (DMF) were purchased from Sigma-

<sup>1</sup> Grella, K.; Harutyunyan, S.; Michrowska, A. *Angew. Chem. Int. Ed.* **2002**, *41*, 4038

<sup>2</sup> Bird, G.H.; Crannell, W.C.; Walensky, L.D. *Curr. Protoc. Chem. Biol.* **2011**, *3*, 99.

Aldrich. Triethylamine (TEA) or N,N-diisopropylethylamine (DIEA) were purchased from Sigma-Aldrich and distilled prior to use.

Standard NMR spectroscopy experiments were conducted on a Varian INOVA 500 ( $^1\text{H}$ : 500 MHz,  $^{13}\text{C}$ : 125 MHz) or Varian INOVA 300 ( $^1\text{H}$ : 300 MHz,  $^{13}\text{C}$ : 75 MHz) spectrometer. NMR spectra are reported as  $\delta$  values in ppm relative to the reported solvent ( $\text{CDCl}_3$  referenced to 7.27,  $\text{CD}_3\text{OD}$  referenced to 3.31). Splitting patterns are abbreviated as follows: singlet (s), doublet (d), triplet (t), quartet (q), multiplet (m), broad (b), apparent (app), and combinations thereof. Spectra were analyzed and processed using MestReNova.

High-resolution mass spectra (HRMS) data was obtained on a JEOL JMS-600H high resolution mass spectrometer operating in  $\text{FAB}^+$  or positive-ion ESI mode. MALDI-TOF spectra were recorded on a Voyager DE-PRO MALDI TOF-MS spectrometer (Applied Biosystems) operating in reflector ion mode using  $\alpha$ -cyano-4-hydroxycinnamic acid as the matrix.

Analytical HPLC was performed on an Agilent 1200 Series TOF with an Agilent G1978A Multimode source in electrospray ionization (ESI), or mixed (MM) ionization mode equipped with an Eclipse Plus  $\text{C}_8$  column (1.8  $\mu\text{m}$ , 2.1 x 50 mm). Preparative HPLC was performed with an Agilent 1100 Series HPLC utilizing an Agilent Eclipse XDB- $\text{C}_{18}$  column (5  $\mu\text{m}$ , 9.4 x 250 mm) or an Agilent Zorbax RX-SIL column (5  $\mu\text{m}$ , 9.4 x 250 mm) using a gradient of double distilled water and HPLC grade acetonitrile containing 0.1% TFA or 0.1% acetic acid (AcOH). LCMS was performed on an Agilent 1200 Series LCMS equipped with a Quadrupole 6120 MS detector and an Eclipse XDB- $\text{C}_{18}$  reverse-phase column (5, 4.6  $\mu\text{m}$  x 150 mm).

Circular Dichroism (CD) spectroscopy was acquired on a CD spectrophotometer (Aviv Biomedical, Inc., Model 430) at 20  $^\circ\text{C}$ . The spectra were collected using a 0.1 cm pathlength quartz cuvette with the following measurement parameters: wavelength 190-255 nm; step resolution 1.0 nm, averaging time 1 sec. All peptide samples were dissolved in deionized water to a final concentration of 40  $\mu\text{M}$  and filtered through a 0.22  $\mu\text{m}$  syringe filter (Pall Life Sciences). The helical content of each peptide was calculated as previously reported.<sup>3</sup>

---

<sup>3</sup> Forood, B.; Feliciano, E.J.; Nambiar, K.P. *Proc. Natl. Acad. Sci.* **1993**, *90*, 838

## Synthesis of Allyl-Modified Amino Acids

### Methyl (S)-2-((tert-butoxycarbonyl)amino)pent-4-enoate (**S1**)

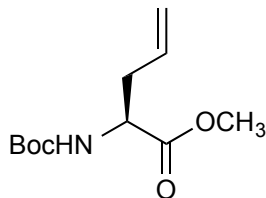

**S1:** C<sub>11</sub>H<sub>19</sub>NO<sub>4</sub>  
Exact Mass: 229.1314

The Boc-protected allyl glycine **S1** was synthesized using a two-step procedure starting from allyl glycine. Briefly, to a stirring suspension of (S)-allyl glycine (4.0 g, 34.6 mmol) in CH<sub>2</sub>Cl<sub>2</sub> (50 mL) was added triethylamine (TEA, 3.8 mL, 52.0 mmol, 1.5 eq.) under Ar(g). The solution was cooled to 0 °C by immersion in an ice bath. Di-*tert*-butyl dicarbonate (11.2 g, 52.0 mmol, 1.5 eq.) was dissolved in CH<sub>2</sub>Cl<sub>2</sub> (20 mL) and added dropwise to the stirring solution. The reaction was removed from the ice bath and allowed to stir at room temperature for 12 h. The crude mixtures was diluted with H<sub>2</sub>O (20 mL) and extracted with 1 M HCl (3 x 20 mL), brine (3 x 20 mL), and dried over Na<sub>2</sub>SO<sub>4</sub>. The solvent was removed *in vacuo* to afford a light yellow oil which was carried on to the next step without further purification.

To the oil was added acetone (40 mL) and solid K<sub>2</sub>CO<sub>3</sub> (9.6 g, 69.2 mmol, 2 eq.) at rt. The reaction was stirred for 10 min, followed by the addition of iodomethane (4.4 mL, 69.2 mmol, 2 eq.) and the mixture stirred for 12 h. The solvent was evaporated and the residue taken up in EtOAc (50 mL) and washed with saturated Na<sub>2</sub>S<sub>2</sub>O<sub>3</sub> (2 x 50 mL), brine (2 x 50 mL), and dried over Na<sub>2</sub>SO<sub>4</sub>. The solvent was removed *in vacuo* and the crude residue was purified by flash chromatography (3:1 Hex:EtOAc) to afford 6.2 g (78%) of **S1** as a colorless oil. <sup>1</sup>H NMR (500 MHz, CDCl<sub>3</sub>) δ 5.64 (ddt, *J* = 16.5, 10.7, 7.2 Hz, 1H), 5.15–4.99 (m, 3H), 4.39–4.25 (m, 1H), 3.68 (s, 3H), 2.56–2.35 (m, 2H), 1.39 (s, 9H); <sup>13</sup>C NMR (126 MHz, CDCl<sub>3</sub>) δ 172.47, 155.13, 132.29, 118.95, 79.76, 52.86, 52.14, 36.69, 28.22 (3C). HRMS (ESI) *m/z* calcd for C<sub>11</sub>H<sub>19</sub>NO<sub>4</sub> [M+H]<sup>+</sup> : 230.1386, found 230.1391

### Methyl O-allyl-N-(tert-butoxycarbonyl)-L-serine (**S2**)

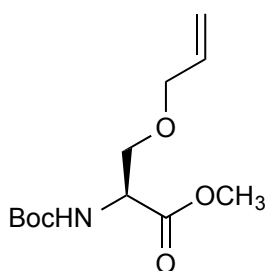

**S2:** C<sub>12</sub>H<sub>21</sub>NO<sub>5</sub>  
Exact Mass: 259.1420

A solution of Boc-Ser-OMe (4.0 g, 18.2 mmol) in anhydrous THF (80 mL) was degassed and treated with allylmethyl carbonate (2.8 mL, 25.4 mmol, 1.4 eq). Tetrakis(triphenylphosphine)palladium (0.42 g, 0.36 mmol, 0.02 eq.) was added and the reaction mixture heated to 60 °C for 4 h upon which TLC (2:1 EtOAc:hexanes) indicated loss of starting material. The solvent was removed under reduced pressure and the residue was diluted with EtOAc (60 mL) and washed with NaHCO<sub>3</sub> (2 x 60 mL) and brine (60 mL). The organic layer was dried over MgSO<sub>4</sub>, filtered, and concentrated under reduced pressure. The residue was purified by column chromatography (SiO<sub>2</sub>; 0% to 66% EtOAc in hexane) to afford 3.2 g (68%) of the product **S2** as a clear oil. <sup>1</sup>H NMR (500 MHz, CDCl<sub>3</sub>) δ 5.79 (ddt, *J* = 17.3, 10.4, 5.6 Hz, 1H), 5.41–5.31 (m, 1H), 5.25–5.10 (m, 2H), 4.40–4.37 (m, 1H), 3.95–3.92 (m, 2H), 3.80 (dd, *J* = 9.5, 3.3 Hz, 1H), 3.71 (s, 3H), 3.61 (dd, *J* = 9.5, 3.4 Hz, 1H), 1.41 (s, 9H); <sup>13</sup>C NMR (126 MHz, CDCl<sub>3</sub>) δ 171.11, 155.42, 134.01, 117.29, 79.85, 72.14, 69.86, 53.92, 52.37, 28.25 (3C). HRMS (ESI) *m/z* calcd for C<sub>12</sub>H<sub>21</sub>N<sub>5</sub>O<sub>5</sub> [M+H]<sup>+</sup> : 260.1492, found 260.1492

### Methyl S-allyl-N-(tert-butoxycarbonyl)-L-cysteine (**S3**)

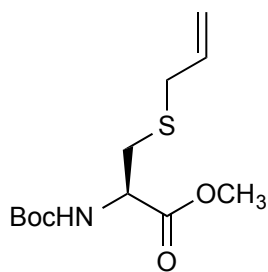

**S3:** C<sub>12</sub>H<sub>21</sub>NO<sub>4</sub>S  
Exact Mass: 275.1191

Following the procedure for **S2**, the allyl-protected cysteine **S3** was obtained when Boc-Cys-OMe (3.6 g, 15.2 mmol) was treated with allylmethyl carbonate (2.4 mL, 21.4 mmol, 1.4 eq.) and tetrakis(triphenylphosphine)palladium (0.34 g, 0.30 mmol, 0.02 eq.) in THF (30 mL). The residue was purified by column chromatography (SiO<sub>2</sub>; 0% to 25% EtOAc in hexane) to afford 2.8 g (69%) of the product **S3** as a clear oil. <sup>1</sup>H NMR (500 MHz, CDCl<sub>3</sub>) δ 5.70 (ddt, *J* = 16.9, 9.6, 7.2 Hz, 1H), 5.38–5.29 (m, 1H), 5.12–5.04 (m, 2H), 4.48–4.46 (m, 1H), 3.72 (s, 3H), 3.13–3.03 (m, 2H), 2.88 (dd, *J* = 13.9, 5.0 Hz, 1H), 2.80 (dd, *J* = 13.9, 5.7 Hz, 1H), 1.41 (s, 9H); <sup>13</sup>C NMR (126 MHz, CDCl<sub>3</sub>) δ 171.55, 155.06, 133.62, 117.78, 80.00, 53.10, 52.45, 35.07, 32.76, 28.25 (3C). HRMS (ESI) *m/z* calcd for C<sub>12</sub>H<sub>21</sub>NO<sub>4</sub>S [M+H]<sup>+</sup>: 276.1263, found 276.1269

### Benzyl (S)-2-((tert-butoxycarbonyl)amino)pent-4-enoate (**S4**)

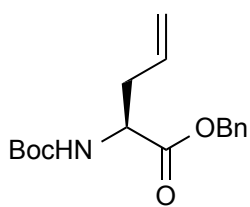

**S4:** C<sub>17</sub>H<sub>23</sub>NO<sub>4</sub>  
Exact Mass: 305.1627

A flask was charged with Boc-allylglycine (5.0 g, 23.2 mmol) and K<sub>2</sub>CO<sub>3</sub> (4.8 g, 34.9 mmol, 1.5 eq.) under Ar(g). To this was added DMF (20 mL) and the solution stirred at rt for 10 min. Benzyl bromide (4.1 mL, 34.9 mmol, 1.5 eq.) was added dropwise to the stirring suspension. The reaction was heated to 50 °C and stirred for 8 h upon which TLC (5:1 Hexanes:EtOAc) indicated loss of starting material. H<sub>2</sub>O (20 mL) was added, followed by EtOAc (100 mL) and the organic layer separated. The aqueous layer was extracted with EtOAc (2 x 100 mL) and the combined organic layers washed with brine (4 x 100 mL) and dried over Na<sub>2</sub>SO<sub>4</sub>, filtered and concentrated *in vacuo*. The crude residue was purified by column chromatography (SiO<sub>2</sub>; 0% to 20% EtOAc in hexane) to afford 6.1 g (86%) of **S4** as a clear oil. <sup>1</sup>H NMR (500 MHz, CDCl<sub>3</sub>) δ 7.43–7.35 (m, 5H), 5.69 (ddt, *J* = 16.1, 10.8, 7.2 Hz, 1H), 5.26–5.09 (m, 5H), 4.47 (app. q, *J* = 6.1 Hz, 1H), 2.63–2.51 (m, 2H), 1.49 (s, 9H). <sup>13</sup>C NMR (126 MHz, CDCl<sub>3</sub>) δ 171.93, 155.19, 135.36, 132.18, 128.58 (2C), 128.42, 128.33 (2C), 119.21, 79.90, 67.06, 52.96, 36.73, 28.30 (3C). HRMS (ESI) *m/z* calcd for C<sub>17</sub>H<sub>23</sub>NO<sub>4</sub> [M+H]<sup>+</sup>: 306.1699, found 306.1709

### Methyl O-allyl-N-(tert-butoxycarbonyl)-L-tyrosine (**S5**)

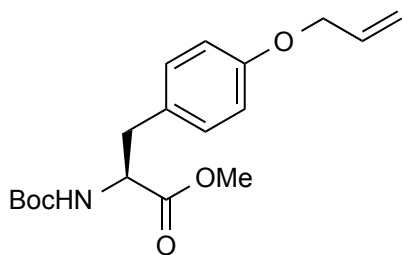

**S5:** C<sub>18</sub>H<sub>25</sub>NO<sub>5</sub>  
Exact Mass: 335.1733

In a typical procedure, a flask was charged with Boc-Tyr-OMe (5.0 g, 16.9 mmol) and K<sub>2</sub>CO<sub>3</sub> (3.5 g, 25.4 mmol, 1.5 eq.) under Ar(g). To this was added DMF (20 mL) and the solution stirred at rt for 10 min. Allyl bromide (2.2 mL, 25.4 mmol, 1.5 eq.) was added dropwise to the stirring suspension. The reaction was heated to 50 °C and stirred for 8 h upon which TLC (3:1 Hexanes:EtOAc) indicated loss of starting material. H<sub>2</sub>O (20 mL) was added, followed by EtOAc (100 mL) and the organic layer separated. The

aqueous layer was extracted with EtOAc (2 x 100 mL) and the combined organic layers washed with brine (4 x 100 mL) and dried over Na<sub>2</sub>SO<sub>4</sub>, filtered and concentrated *in vacuo*. The crude residue was purified by column chromatography (SiO<sub>2</sub>; 0% to 25% EtOAc in hexanes) to afford 4.1 g (73%) of the product **S5** as a white solid. <sup>1</sup>H NMR (500 MHz, CDCl<sub>3</sub>) δ 7.06 (d, *J* = 8.4 Hz, 2H), 6.89–6.86 (m, 2H), 6.12–6.04 (m, 1H), 5.46–5.42 (m, 1H), 5.33–5.30 (m, 1H), 5.03 (d, *J* = 7.5 Hz, 1H), 4.59–4.53 (m, 3H), 3.74 (s, 3H), 3.06 (m, 2H), 1.46 (s, 9H). <sup>13</sup>C NMR (126 MHz, CDCl<sub>3</sub>) δ 172.41, 157.66, 155.08, 133.27, 130.25 (3C), 128.12, 117.62, 114.76, 79.84, 68.76, 54.52, 52.17, 37.45, 28.30 (3C). HRMS (ESI) *m/z* calcd for C<sub>18</sub>H<sub>25</sub>NO<sub>5</sub> [M+H]<sup>+</sup> : 336.1805, found 336.1818

### O-allyl-N-(tert-butoxycarbonyl)-L-serine (**S6**)

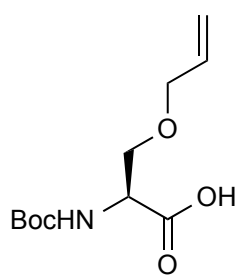

**S6**: C<sub>11</sub>H<sub>19</sub>NO<sub>5</sub>  
Exact Mass: 245.1263

Boc-Ser-OH (3.1 g, 15.1 mmol) was dissolved in DMF (40 mL) and cooled to 0 °C in an ice bath. NaH (1.51 g, 37.8 mmol, 2.5 eq.) was added portionwise and the reaction allowed to stir at 0 °C for 30 min. Allyl bromide (1.3 mL, 15.1 mmol, 1.0 eq) was added dropwise and the reaction allowed to warm to rt and stirred for 12 h. The reaction mixture was quenched with H<sub>2</sub>O (15 mL) and the solvent removed *in vacuo*. The crude mixture was portioned between H<sub>2</sub>O (20 mL) and EtOAc (20 mL). The organic layer was removed and the aqueous layer was acidified to pH 2 with 1 N HCl and extracted with EtOAc (30 mL). The combined organic layers were washed with brine (1 x 30 mL), dried over MgSO<sub>4</sub>, filtered, and concentrated to dryness to afford the viscous oil **S6** (2.3 g, 61%) which was found to be of sufficient purity to be used in subsequent reactions. <sup>1</sup>H NMR (500 MHz, CDCl<sub>3</sub>) δ 10.77 (s, 1H), 5.89 (ddt, *J* = 16.2, 10.9, 5.6 Hz, 1H), 5.46 (d, *J* = 8.4 Hz, 1H), 5.34–5.22 (m, 2H), 4.53–4.47 (m, 1H), 4.05 (dt, *J* = 5.6, 1.2 Hz, 2H), 3.95 (dd, *J* = 9.4, 2.9 Hz, 1H), 3.72 (dd, *J* = 9.5, 3.6 Hz, 1H), 1.50 (s, 9H). <sup>13</sup>C NMR (126 MHz, CDCl<sub>3</sub>) δ 175.53, 155.71, 133.86, 117.73, 80.32, 72.37, 69.59, 53.77, 28.29 (3C). HRMS (ESI) *m/z* calcd for C<sub>11</sub>H<sub>19</sub>NO<sub>5</sub> [M+H]<sup>+</sup> : 246.1335, found 246.1348

### S-allyl-N-(tert-butoxycarbonyl)-L-cysteine (**S7**)

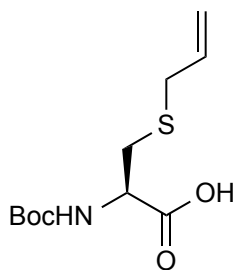

**S7**: C<sub>11</sub>H<sub>19</sub>NO<sub>4</sub>S  
Exact Mass: 261.1035

To a solution of compound **S3** (0.70 g, 2.4 mmol) in THF (20 mL) was added LiOH (0.14 g, 6.0 mmol, 2.5 eq.), followed by H<sub>2</sub>O (20 mL). The reaction mixture was heated to 60 °C and stirred for 6 h upon which TLC (4:1 Hexanes:EtOAc) indicated loss of starting material. The solvent was removed *in vacuo* and partitioned between EtOAc (30 mL) and H<sub>2</sub>O (30 mL). The organic layer was removed, and the aqueous layer was acidified to pH 2 and extracted with EtOAc (3 x 30 mL). The combined organic layers were washed with brine (1 x 30 mL) and dried over Na<sub>2</sub>SO<sub>4</sub>, filtered, and concentrated to dryness to afford 0.51 g (88%) of **S7** as a clear oil. The product was found to be of sufficient purity to be used in subsequent reactions. <sup>1</sup>H NMR (500 MHz, CDCl<sub>3</sub>) δ 10.62 (s, 1H), 5.85–5.74 (m, 1H), 5.43 (d, *J* = 7.5 Hz, 1H), 5.20–5.07 (m, 2H), 4.58–4.55 (m, 1H), 3.19 (d, *J* = 7.2 Hz, 2H), 3.03–2.91 (m, 2H), 1.49 (s, 9H). <sup>13</sup>C NMR (126 MHz, CDCl<sub>3</sub>) δ 175.39,

155.40, 133.58, 118.00, 77.26, 53.00, 35.19, 32.55, 28.29 (3C). HRMS (ESI)  $m/z$  calcd for  $C_{11}H_{19}NO_4S$   $[M+H]^+$  : 262.1107, found 262.1114

### O-allyl-N-(tert-butoxycarbonyl)-L-tyrosine (**S8**)

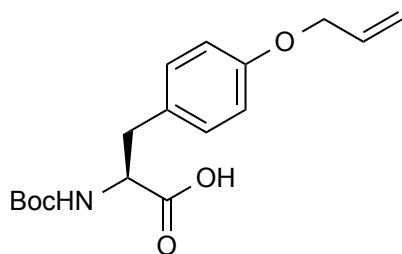

**S8**:  $C_{17}H_{23}NO_5$   
Exact Mass: 321.1576

In a typical procedure, a flask was charged with compound **S5** (1.6 g, 4.6 mmol) and to this was added THF (10 mL). An aqueous solution of 1M LiOH (11 mL, 11.4 mmol, 2.5 eq.) was added and the reaction heated to 65 °C and stirred for 7 h. The solvent was removed *in vacuo* and the solution partitioned between EtOAc (50 mL) and H<sub>2</sub>O (50 mL). The aqueous layer was acidified to pH 2 and extracted with EtOAc (2 x 50 mL). The combined organic layers were washed with H<sub>2</sub>O (2 x 20 mL), brine (1 x 20 mL), dried over MgSO<sub>4</sub>, filtered and concentrated to dryness to afford 1.3 g (89%) of **S8** as a clear oil. The product was found to be of sufficient purity to be used in subsequent reactions. <sup>1</sup>H NMR (500 MHz, CDCl<sub>3</sub>)  $\delta$  10.37 (s, 1H), 7.13 (d,  $J$  = 8.5 Hz, 2H), 6.88 (d,  $J$  = 8.6 Hz, 2H), 6.09 (ddt,  $J$  = 17.2, 10.5, 5.3 Hz, 1H), 5.22–5.13 (m, 2H), 5.01 (d,  $J$  = 7.6 Hz, 1H), 4.62–4.56 (m, 1H), 4.03 (t,  $J$  = 7.6 Hz, 2H), 3.19–2.89 (m, 2H), 2.60–2.56 (m, 2H), 1.47 (s, 9H). <sup>13</sup>C NMR (126 MHz, CDCl<sub>3</sub>)  $\delta$  157.76, 155.44, 133.25, 130.36 (2C), 127.83, 117.69, 114.87 (2C), 80.33, 68.81, 54.38, 36.86, 28.29 (3C), 28.06. HRMS (ESI)  $m/z$  calcd for  $C_{17}H_{23}NO_5$   $[M+H]^+$  : 322.1648, found 322.1648

### General procedure for homoallyl modification of amino acids

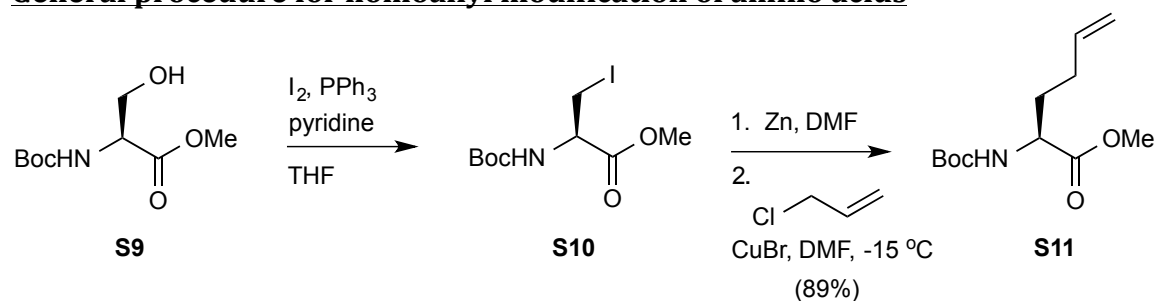

### Methyl (S)-2-((tert-butoxycarbonyl)amino)hex-5-enoate (**S11**)

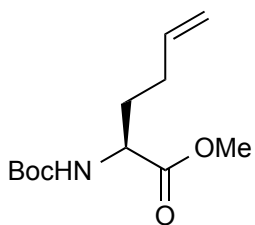

**S11**:  $C_{13}H_{25}NO_4$   
Exact Mass: 259.1784

Boc-homoallyl glycine-OMe **S11** was synthesized using a three-step protocol from commercially available Boc-Ser-OMe **S9**. In a typical procedure, a flask was charged with Boc-Ser-OMe (2.0 g, 9.1 mmol) and triphenylphosphine (3.6 g, 13.7 mmol, 1.5 eq.) under Ar(g). To this was added THF (20 mL) and the solution cooled to 0 °C by immersion in an ice bath. Pyridine (1.5 mL, 18.2 mmol, 2 eq.) was added dropwise, followed by solid iodine (3.5 g, 13.7 mmol, 1.5 eq.) in three portions at 0 °C. The ice bath was removed and stirring was continued for 4 h at rt. The mixture was extracted with Et<sub>2</sub>O (3 x 20 mL). The combined organic layers were washed with 1M HCl (3 x 20 mL), 1M Na<sub>2</sub>S<sub>2</sub>O<sub>3</sub> (2 x



20 mL), brine (2 x 20 mL) and dried over Na<sub>2</sub>SO<sub>4</sub>, filtered and concentrated *in vacuo*. The crude residue was of sufficient purity to be used in the next step without further purification.

The iodopropanoate **S10** was dissolved in DMF (5 mL) and added dropwise to a flask containing activated zinc (2.4 g, 36.4 mmol, 4 eq.) at 0 °C under Ar(g). The reaction mixture was removed from the ice bath and allowed to stir at rt for 3 h, upon which TLC (4:1 petroleum ether: EtOAc) indicated loss of starting material and formation of a lower R<sub>f</sub> spot. At this point, the reaction mixture was stopped to let the solid settle to the bottom. The supernatant was then carefully transferred by syringe to a suspension of copper(I) bromide (0.26 g, 1.8 mmol) in DMF (mL) at -15 °C that also contained allyl chloride (1.3 mL, 15.5 mmol, 1.7 eq.). After complete addition, the cooling bath was removed and stirring was continued overnight. At this point, EtOAc (20 mL) was added to the reaction mixture and stirring was continued for 15 min. To the mixture was added H<sub>2</sub>O (20 mL), the organic layer was removed and successively washed with 1M Na<sub>2</sub>S<sub>2</sub>O<sub>3</sub> (2 x 20 mL), H<sub>2</sub>O (2 x 20 mL), brine (2 x 20 mL), and dried over Na<sub>2</sub>SO<sub>4</sub>, filtered and concentrated *in vacuo*. The crude residue was purified by flash chromatography (SiO<sub>2</sub>, 8:1 petroleum ether:EtOAc) to afford 2.0 g (90%) of **S11** as a colorless oil. <sup>1</sup>H NMR (500 MHz, CDCl<sub>3</sub>) δ 5.72 (ddt, *J* = 16.9, 10.2, 6.6 Hz, 1H), 5.18–5.07 (m, 1H), 5.01–4.90 (m, 2H), 4.26–4.23 (m, 1H), 3.67 (s, 3H), 2.08–2.01 (m, 2H), 1.88–1.79 (m, 1H), 1.70–1.61 (m, 1H), 1.37 (s, 9H); <sup>13</sup>C NMR (126 MHz, CDCl<sub>3</sub>) δ 173.11, 155.23, 136.87, 115.50, 79.64, 52.09, 51.99, 31.85, 29.39, 28.21 (3C). HRMS (ESI) *m/z* calcd for C<sub>13</sub>H<sub>25</sub>NO<sub>4</sub> [M+H]<sup>+</sup>: 260.1856, found 260.1866

### Methyl-O-homoallyl-N-(tert-butoxycarbonyl)-L-tyrosine (**S12**)

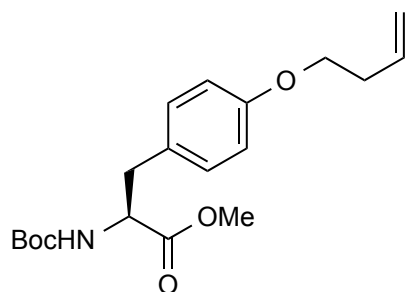

**S12**: C<sub>19</sub>H<sub>27</sub>NO<sub>5</sub>  
Exact Mass: 349.1889

In a typical procedure, a flask was charged with Boc-Tyr-OMe (4.0 g, 13.5 mmol) and K<sub>2</sub>CO<sub>3</sub> (2.8 g, 20.2 mmol, 1.5 eq.) under Ar(g). To this was added DMF (15 mL) and the solution stirred at room temperature for 10 min. 4-bromo-1-butene (2.1 mL, 20.2 mmol, 1.5 eq.) was added dropwise to the stirring suspension. The reaction was heated to 50 °C and stirred for 8 h. H<sub>2</sub>O (15 mL) was added, followed by EtOAc (80 mL) and the organic layer separated. The aqueous layer was extracted with EtOAc (2 x 100 mL) and the combined organic layers washed with brine (2 x 100 mL) and dried over Na<sub>2</sub>SO<sub>4</sub>, filtered and concentrated *in vacuo*. The crude residue was purified by column chromatography (SiO<sub>2</sub>; 0% to 25% EtOAc in hexanes) to afford 1.8 g (38%) of the product **S12** as a white solid. <sup>1</sup>H NMR (500 MHz, CDCl<sub>3</sub>) δ 7.05 (d, *J* = 8.4 Hz, 2H), 6.91–6.80 (m, 2H), 5.93 (ddt, *J* = 17.0, 10.2, 6.7 Hz, 1H), 5.24–5.12 (m, 2H), 5.02 (d, *J* = 8.0 Hz, 1H), 4.59–4.55 (m, 1H), 4.02 (t, *J* = 6.7 Hz, 2H), 3.74 (s, 3H), 3.11–3.01 (m, 2H), 2.57 (m, 2H), 1.46 (s, 9H). <sup>13</sup>C NMR (126 MHz, CDCl<sub>3</sub>) δ 172.42, 157.96, 155.09, 134.43, 130.32, 130.25, 127.93, 117.00, 114.59, 79.83, 67.15, 61.27, 54.53, 52.17, 37.44, 33.64, 28.30 (3C). HRMS (ESI) *m/z* calcd for C<sub>19</sub>H<sub>27</sub>NO<sub>5</sub> [M+H]<sup>+</sup>: 350.1961, found 350.1966

## O-homoallyl-N-(tert-butoxycarbonyl)-L-tyrosine (**S13**)

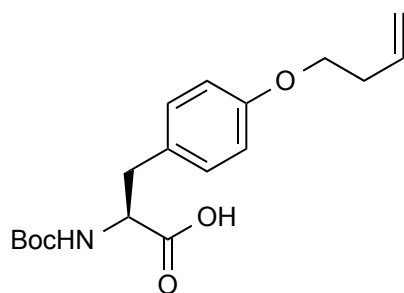

**S13:** C<sub>18</sub>H<sub>25</sub>NO<sub>5</sub>  
Exact Mass: 335.1733

Compound **S12** (1.6 g, 4.6 mmol) was dissolved in THF (10 mL). An aqueous solution of 1M LiOH (11 mL, 11.4 mmol, 2.5 eq.) was added and the reaction heated to 65 °C and stirred for 7 h. The solvent was removed *in vacuo* and the solution partitioned between EtOAc (50 mL) and H<sub>2</sub>O (50 mL). The aqueous layer was acidified to pH 2 and extracted with EtOAc (2 x 50 mL). The combined organic layers were washed with H<sub>2</sub>O (2 x 20 mL) and brine (1 x 20 mL) and dried over MgSO<sub>4</sub>. The product **S13** was found to be of sufficient purity to be used in subsequent reactions. <sup>1</sup>H NMR (500 MHz, CDCl<sub>3</sub>) δ 10.37 (s, 1H), 7.12 (d, *J* = 8.5 Hz, 2H), 6.88 (d, *J* = 8.4 Hz, 2H), 5.94 (ddt, *J* = 17.0, 10.2, 6.7 Hz, 1H), 5.22–5.13 (m, 2H), 5.01 (d, *J* = 7.7 Hz, 1H), 4.62–4.56 (m, 1H), 4.03 (t, *J* = 6.7 Hz, 2H), 3.19–2.89 (m, 2H), 2.60–2.56 (m, 2H), 1.47 (s, 9H) <sup>13</sup>C NMR (126 MHz, CDCl<sub>3</sub>) δ 176.62, 158.00, 155.38, 134.43, 130.38, 130.34, 127.77, 117.01, 114.67, 80.22, 67.19, 54.37, 36.93, 33.64, 28.31 (3C). HRMS (ESI) *m/z* calcd for C<sub>18</sub>H<sub>25</sub>NO<sub>5</sub> [M+H]<sup>+</sup> : 336.1805, found 335.1811

## General synthesis of peptides bearing i, i+2 olefin crosslinks

### N-Boc-Tyr(O-allyl)-Leu-Allylglycine methyl ester (**8a**)

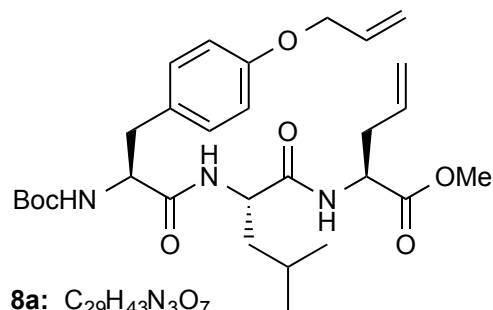

**8a:** C<sub>29</sub>H<sub>43</sub>N<sub>3</sub>O<sub>7</sub>  
Exact Mass: 545.3101

Synthesis of peptide **8a** was achieved using a C-terminal to N-terminal modification strategy. Briefly, Boc-allylglycine-OMe **S1** (1.0 g, 4.4 mmol) was dissolved in CH<sub>2</sub>Cl<sub>2</sub> (44 mL). To this was added TFA (10 mL, 132 mmol, 30 eq.) and the reaction stirred at rt for 2 h. The solution was concentrated *in vacuo* and the crude residue dissolved in DMF (6 mL), followed by the addition of DIEA (3.8 mL, 22 mmol, 5 eq.). The reaction mixture was stirred at rt for 10 min. A solution of Boc-Leu-OH (1.1 g, 4.8 mmol, 1.1 eq), HOBT (0.73 g, 4.8 mmol, 1.1 eq), HBTU (1.8 g, 4.8 mmol, 1.1 eq) in DMF (5 mL) and DIEA (1 mL) was added to the stirring solution and the reaction mixture allowed to stir at rt for 4 h. H<sub>2</sub>O (20 mL) was added, followed by EtOAc (20 mL). The organic layer was separated and the aqueous layer washed with EtOAc (3 x 20 mL). The combined organic layers were washed with an aqueous solution of 1 M LiCl (3 x 20 mL) and dried over MgSO<sub>4</sub>, filtered, and concentrated to dryness to afford a clear oil that was sufficiently pure (judged by NMR and LCMS) to be carried on to the next step. At this point, the crude residue was dissolved in CH<sub>2</sub>Cl<sub>2</sub> (40 mL) and to this was added TFA (10 mL, 30 eq.). The reaction was stirred at rt for 2 h and concentrated *in vacuo*. The residue was dissolved in DMF (6 mL) and DIEA (3.8 mL) and allowed to stir for 10 min. A solution of Boc-protected Tyrosine **S8** (1.5 g, 4.8 mmol, 1.1 eq.), HOBT (0.73 g, 4.8 mmol, 1.1 eq.), HBTU (1.8 g, 4.8 mmol, 1.1 eq.) in DMF (5 mL) and DIEA (1 mL) was added and the reaction mixture allowed

to stir at rt for 4 h. H<sub>2</sub>O (20 mL) was added, followed by EtOAc (20 mL). The organic layer was separated and the aqueous layer washed with EtOAc (3 x 20 mL). The combined organic layers were washed with 1 M LiCl (3 x 20 mL) and dried over MgSO<sub>4</sub>, filtered, and concentrated to dryness. The crude residue was purified by column chromatography (SiO<sub>2</sub>; 0% to 33% EtOAc in hexanes) to afford 0.11 g (45%) of product **8a** as a clear oil. <sup>1</sup>H NMR (500 MHz, CDCl<sub>3</sub>) δ 7.09 (d, *J* = 8.6 Hz, 2H), 6.86–6.79 (m, 2H), 6.76 (d, *J* = 7.6 Hz, 1H), 6.57 (d, *J* = 7.6 Hz, 1H), 6.03 (ddt, *J* = 17.2, 10.5, 5.3 Hz, 1H), 5.73–5.61 (m, 1H), 5.41–5.37 (m, 1H), 5.28–5.25 (m, 1H), 5.12–5.07 (m, 3H), 4.63–4.56 (m, 1H), 4.51–4.41 (m, 3H), 4.34 (bs, 1H), 3.73 (s, 3H), 3.03–2.95 (m, 2H), 2.58–2.44 (m, 2H), 1.66–1.43 (m, 3H), 1.39 (s, 9H), 0.90–0.88 (m, 6H). <sup>13</sup>C NMR (126 MHz, CDCl<sub>3</sub>) δ 172.22, 171.89, 157.25, 155.60, 133.37, 132.60, 130.43, 129.29, 118.59, 117.25, 114.40, 79.19, 77.46, 68.54, 55.41, 52.06, 52.00, 51.70, 41.36, 37.76, 36.18, 28.33 (3C), 24.53, 22.72, 22.39. HRMS (ESI) *m/z* calcd for C<sub>29</sub>H<sub>43</sub>N<sub>3</sub>O<sub>7</sub> [M+H]<sup>+</sup> : 546.3173, found 546.3188

### N-Boc-Tyr(O-homoallyl)-Leu-Allylglycine methyl ester (**8b**)

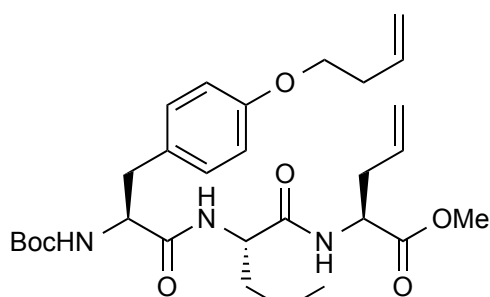

**8b**: C<sub>30</sub>H<sub>45</sub>N<sub>3</sub>O<sub>7</sub>

Exact Mass: 559.3258

Following the procedure for the synthesis of **8a**, the peptide **8b** was obtained following a C- to N-terminal modification strategy. Briefly, Boc-allylglycine-OMe **S1** (0.62 g, 2.7 mmol) was deprotected in TFA (6 mL, 30 eq.) and CH<sub>2</sub>Cl<sub>2</sub> (25 mL), followed by the addition of Boc-Leu-OH (0.69 g, 3.0 mmol, 1.1 eq.) HOBt (0.46 g, 3.0 mmol), HBTU (1.1 g, 3.0 mmol), in DMF (5 mL) and DIEA (1 mL). After completion of the reaction, H<sub>2</sub>O (20 mL) was added followed by extraction with EtOAc (3 x 20 mL) and drying with MgSO<sub>4</sub>. The residue was then deprotected with TFA (6 mL) in CH<sub>2</sub>Cl<sub>2</sub> (25 mL), from which a solution of Boc-homoallyl-Tyrosine **S13** (1.2 g, 3.0 mmol, 1.1 eq.) HOBt (0.46 g, 3.0 mmol), HBTU (1.1 g, 3.0 mmol) in DMF (5 mL) and DIEA (1 mL) was added and the reaction stirred for 4 h. H<sub>2</sub>O (20 mL) was added and the crude mixture extracted with EtOAc (3 x 20 mL). The organic layers were washed with 1 M LiCl (2 x 30 mL), dried over MgSO<sub>4</sub>, filtered and concentrated to dryness. The crude tripeptide was purified by column chromatography (SiO<sub>2</sub>; 0% to 25% EtOAc in hexanes) to afford 0.88 g (58%) of the product **8b** as a white solid. <sup>1</sup>H NMR (500 MHz, CDCl<sub>3</sub>) δ 7.12 (d, *J* = 8.5 Hz, 2H), 6.89–6.82 (m, 2H), 5.92 (ddt, *J* = 17.0, 10.2, 6.7 Hz, 1H), 5.77–5.64 (m, 1H), 5.23–5.09 (m, 5H), 4.66–4.61 (m, 1H), 4.53–4.49 (m, 1H), 4.38–4.29 (m, 1H), 4.00 (t, *J* = 6.7 Hz, 2H), 3.77–3.73 (m, 3H), 3.07–2.98 (m, 2H), 2.64–2.49 (m, 4H), 1.69–1.47 (m, 2H), 1.43 (s, 9H), 0.93–0.87 (m, 6H). <sup>13</sup>C NMR (126 MHz, CDCl<sub>3</sub>) δ 171.74, 171.48, 171.33, 157.92, 157.89, 134.39, 130.30, 130.18, 128.42, 117.00, 114.72, 114.69, 114.67, 67.15, 52.32, 51.81, 51.76, 51.57, 51.39, 41.04, 40.71, 36.31, 36.23, 33.63, 28.24 (3C), 24.48, 22.87, 22.01. HRMS (ESI) *m/z* calcd for C<sub>30</sub>H<sub>45</sub>N<sub>3</sub>O<sub>7</sub> [M+H]<sup>+</sup> : 560.3330, found 560.3341

### N-Boc-Tyr(O-homoallyl)-Leu-Homoallylglycine methyl ester (**8c**)

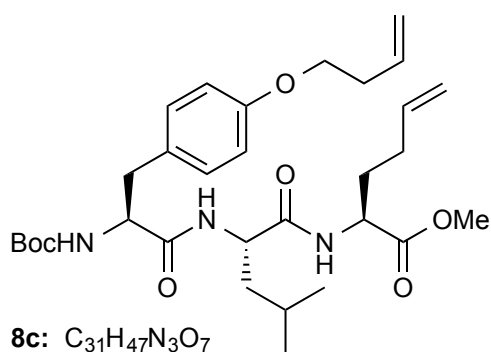

**8c**: C<sub>31</sub>H<sub>47</sub>N<sub>3</sub>O<sub>7</sub>  
Exact Mass: 573.3414

Following the procedure for the synthesis of **8a**, the peptide **8c** was obtained following a C- to N-terminal modification strategy. Briefly, Boc-homoallylglycine-OMe **S11** (0.50 g, 2.1 mmol) was deprotected in TFA (5 mL, 30 eq.) and CH<sub>2</sub>Cl<sub>2</sub> (21 mL), followed by the addition of Boc-Leu-OH (0.53 g, 2.3 mmol, 1.1 eq.) HOBt (0.35 g, 2.3 mmol), HBTU (0.84 g, 2.3 mmol, 1.1 eq.), in DMF (4 mL) and DIEA (0.5 mL). After completion of the reaction, H<sub>2</sub>O (15 mL) was added followed by extraction with EtOAc (3 x 15 mL) and drying with MgSO<sub>4</sub>. The residue was then

deprotected with TFA (5 mL) in CH<sub>2</sub>Cl<sub>2</sub> (21 mL), from which a solution of Boc-homoallyl-Tyrosine **S13** (0.77 g, 2.3 mmol, 1.1 eq.) HOBt (0.35 g, 2.3 mmol), HBTU (0.84 g, 2.3 mmol) in DMF (4 mL) and DIEA (0.5 mL) was added and the reaction stirred for 4 h. H<sub>2</sub>O (15 mL) was added and the crude mixture extracted with EtOAc (3 x 15 mL). The organic layers were washed with 1 M LiCl (2 x 20 mL), dried over MgSO<sub>4</sub>, filtered and concentrated to dryness. The crude tripeptide was purified by column chromatography (SiO<sub>2</sub>; 0% to 33% EtOAc in hexanes) to afford 0.80 g (67%) of the product **8c** as a clear oil. <sup>1</sup>H NMR (500 MHz, CDCl<sub>3</sub>) δ 7.23 (d, *J* = 7.0 Hz, 1H), 7.08–7.03 (m, 2H), 6.79–6.76 (m, 2H), 5.88 (ddt, *J* = 17.0, 10.2, 6.7 Hz, 1H), 5.75 (ddt, *J* = 16.8, 10.2, 6.6 Hz, 1H), 5.44 (d, *J* = 7.8 Hz, 1H), 5.19–4.94 (m, 4H), 4.58–4.52 (m, 2H), 4.44 (bs, 1H), 3.94 (t, *J* = 6.7 Hz, 2H), 3.73 (s, 3H), 3.42–3.35 (m, 1H), 3.01–2.91 (m, 2H), 2.53–2.49 (m, 2H), 2.38 (t, *J* = 8.1 Hz, 1H), 2.11–1.89 (m, 4H), 1.81–1.47 (m, 4H), 1.38 (s, 9H), 0.89 (d, *J* = 6.4 Hz, 6H). <sup>13</sup>C NMR (126 MHz, CDCl<sub>3</sub>) δ 175.10, 172.52, 171.74, 157.76, 155.53, 136.75, 134.40, 130.31, 128.62, 116.92, 115.86, 114.51, 79.85, 67.08, 55.62, 52.21, 51.71, 49.43, 41.15, 37.26, 33.60, 31.20, 30.64, 29.54, 28.25 (3C), 24.49, 22.68, 22.28, 17.62. HRMS (ESI) *m/z* calcd for C<sub>31</sub>H<sub>47</sub>N<sub>3</sub>O<sub>7</sub> [M+H]<sup>+</sup>: 574.3486, found 574.3499

### Procedure for synthesis of alkene modified peptides bearing i, i+3 crosslinks

#### N-Boc-allylglycine-Leu-Leu-allylglycine benzyl ester (**10**)

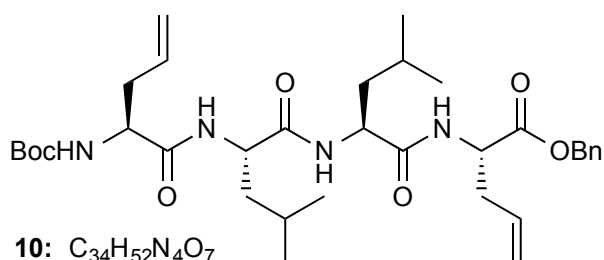

**10**: C<sub>34</sub>H<sub>52</sub>N<sub>4</sub>O<sub>7</sub>  
Exact Mass: 628.3836

Synthesis of peptide **10** was achieved using a C-terminal to N-terminal modification strategy. Briefly, Boc-allylglycine-OBn **S4** (0.90 g, 2.9 mmol) was dissolved in CH<sub>2</sub>Cl<sub>2</sub> (29 mL). To this was added TFA (7 mL, 88 mmol, 30 eq.) and the reaction stirred at rt for 2 h. The solution was concentrated *in vacuo* and the crude residue dissolved in DMF (5 mL), followed by the addition of

DIEA (2.6 mL, 15 mmol, 5 eq.). The reaction mixture was stirred at rt for 10 min. A solution of Boc-Leu-OH (0.73 g, 3.2 mmol, 1.1 eq.), HOBt (0.49 g, 3.2 mmol, 1.1 eq.), HBTU (1.2 g, 3.2 mmol, 1.1 eq) in DMF (5 mL) and DIEA (1 mL) was added to the stirring solution and the

reaction mixture allowed to stir at rt for 4 h. H<sub>2</sub>O (20 mL) was added, followed by EtOAc (15 mL). The organic layer was separated and the aqueous layer washed with EtOAc (3 x 15 mL). The combined organic layers were washed with an aqueous solution of 1 M LiCl (3 x 15 mL) and dried over MgSO<sub>4</sub>, filtered, and concentrated to dryness to afford a clear oil that was sufficiently pure (judged by LCMS) to be carried on to the next step. At this point, the crude residue was dissolved in CH<sub>2</sub>Cl<sub>2</sub> (30 mL) and to this was added TFA (7 mL, 30 eq.). The reaction was stirred at rt for 2 h and concentrated *in vacuo*. The residue was dissolved in DMF (5 mL) and DIEA (2.6 mL) and allowed to stir for 10 min. A solution of Boc-Leu-OH (0.73 g, 3.2 mmol, 1.1 eq.), HOBt (0.49 g, 3.2 mmol, 1.1 eq.), HBTU (1.2 g, 3.2 mmol, 1.1 eq.) in DMF (5 mL) and DIEA (1 mL) was added and the reaction mixture allowed to stir at rt for 4 h. H<sub>2</sub>O (15 mL) was added, followed by EtOAc (15 mL). The organic layer was separated and the aqueous layer washed with EtOAc (3 x 15 mL). The combined organic layers were washed with 1 M LiCl (3 x 15 mL) and dried over MgSO<sub>4</sub>, filtered, and concentrated to dryness. For the final amino acid coupling, Boc-allylglycine-OH (0.69 g, 3.2 mmol, 1.1 eq.), HOBt (0.49 g, 3.2 mmol, 1.1 eq.) HBTU (1.2 g, 3.2 mmol, 1.1 eq.) in DMF (5 mL) and DIEA (1 mL) was added to a stirring solution of the deprotected tripeptide in DMF (5 mL) and DIEA (1 mL). The reaction was stirred at rt for 4 hr. At this point, H<sub>2</sub>O (15 mL) was added, followed by EtOAc (15 mL). The organic layer was removed and the aqueous layer extracted with EtOAc (3 x 20 mL). The combined organic layers were washed with 1 M LiCl (3 x 20 mL), brine (1 x 20 mL), and dried over MgSO<sub>4</sub>, filtered, and concentrated *in vacuo*. The crude residue was purified by column chromatography (SiO<sub>2</sub>; 0% to 20% EtOAc in hexanes) to afford 0.81 g (45%) of product **10** as a clear oil. <sup>1</sup>H NMR (500 MHz, CDCl<sub>3</sub>) δ 7.73 (d, *J* = 7.7 Hz, 2H), 7.37–7.33 (m, 5H), 5.77–5.65 (m, 3H), 5.26–5.00 (m, 6H), 4.82–4.70 (m, 1H), 2.64–2.38 (m, 4H), 1.78–1.51 (m, 6H), 1.45 (s, 9H), 0.94–0.87 (m, 12H). <sup>13</sup>C NMR (126 MHz, CDCl<sub>3</sub>) δ 171.93, 171.87, 171.56, 171.35, 155.71, 135.40, 133.12, 132.45, 128.51 (2C), 128.32 (2C), 118.66, 118.50, 79.73, 67.04, 53.64, 51.79, 51.57, 51.46, 41.88, 41.22, 37.70, 36.33, 28.35 (3C), 24.72, 24.71, 22.85, 22.59, 22.52, 22.37. HRMS (ESI) *m/z* calcd for C<sub>34</sub>H<sub>52</sub>N<sub>4</sub>O<sub>7</sub> [M+H]<sup>+</sup>: 629.3908, found 629.3986

### N-Boc-allyls erine-Leu-Leu-allyls erine methyl ester (**11**)

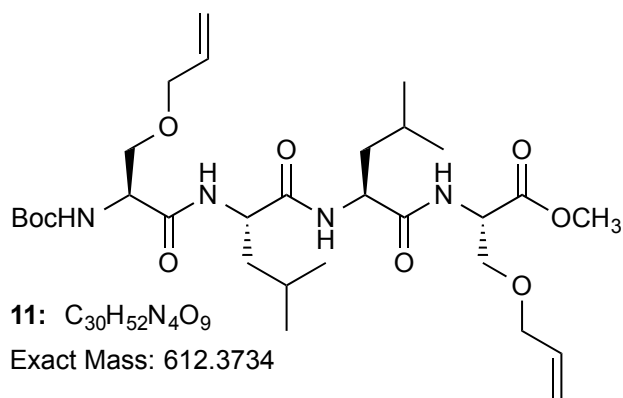

Following the procedure for the synthesis of **10**, the peptide **11** was obtained following a C- to N-terminal modification strategy. Briefly, Boc-O-allyls erine-OMe **S2** (0.44 g, 1.7 mmol) was deprotected in TFA (4 mL, 30 eq.) and CH<sub>2</sub>Cl<sub>2</sub> (17 mL), followed by the addition of Boc-Leu-OH (0.44 g, 1.9 mmol, 1.1 eq.) HOBt (0.29 g, 1.9 mmol), HBTU (0.72 g, 1.9 mmol, 1.1 eq.), in DMF (4 mL) and DIEA (0.5 mL). After completion of the reaction, H<sub>2</sub>O (15 mL) was added

followed by extraction with EtOAc (3 x 15 mL) and drying with MgSO<sub>4</sub>. The residue was then deprotected with TFA (4 mL) in CH<sub>2</sub>Cl<sub>2</sub> (17 mL), from which a solution of Boc-Leu-OH (0.44 g, 1.9 mmol, 1.1 eq.) HOBt (0.29 g, 1.9 mmol), HBTU (0.72 g, 1.9 mmol) in DMF (4 mL)

and DIEA (0.5 mL) was added and the reaction stirred for 4 h. H<sub>2</sub>O (15 mL) was added and the crude mixture extracted with EtOAc (3 x 15 mL). The organic layers were washed with 1 M LiCl (2 x 20 mL), dried over MgSO<sub>4</sub>, filtered and concentrated to dryness. The crude residue was dissolved in CH<sub>2</sub>Cl<sub>2</sub> (17 mL) and TFA (4 mL) and allowed to stir for 2 h, concentrated *in vacuo* and to this was added a solution of Boc-allylserine-OH **S6** (0.46 g, 1.9 mmol, 1.1 eq.) HOBt (0.29 g, 1.9 mmol), HBTU (0.72 g, 1.9 mmol), DIEA (0.5 mL) and DMF (4 mL). After completion of the reaction as judged by LCMS, H<sub>2</sub>O (15 mL) was added, followed by EtOAc (15 mL). The organic layer was removed and the aqueous layer extracted with EtOAc (3 x 15 mL). The combined organic layers were washed with 1 M LiCl (3 x 15 mL), dried over MgSO<sub>4</sub>, filtered, and concentrated to dryness. The crude residue was purified by column chromatography (SiO<sub>2</sub>; 0% to 25% EtOAc in CH<sub>2</sub>Cl<sub>2</sub>) to afford 0.43 g (42%) of product **11** as a clear, colorless oil; <sup>1</sup>H NMR (500 MHz, CDCl<sub>3</sub>) δ 7.11 (d, *J* = 7.2 Hz, 2H), 6.99 (d, *J* = 7.1 Hz, 1H), 5.89–5.78 (m, 2H), 5.58 (d, *J* = 6.5 Hz, 1H), 5.29–5.13 (m, 4H), 4.72 (m, 1H), 4.58–4.54 (m, 1H), 4.50–4.44 (m, 1H), 4.31 (bs, 1H), 4.04–3.92 (m, 4H), 3.91–3.85 (m, 1H), 3.79–3.77 (m, 1H), 3.75 (s, 3H), 3.65–3.57 (m, 2H), 1.75–1.52 (m, 6H), 1.45 (s, 9H), 0.93–0.89 (m, 12H). <sup>13</sup>C NMR (126 MHz, CDCl<sub>3</sub>) δ 172.03, 171.90, 170.72, 170.48, 155.76, 134.04, 133.85, 117.60, 117.44, 80.41, 72.20, 72.12, 69.44, 69.30, 54.46, 53.78, 52.61, 52.52, 52.23, 51.58, 40.83, 38.59, 28.23 (3C), 24.65, 23.00, 22.85, 22.78, 22.03, 21.76. HRMS (ESI) *m/z* calcd for C<sub>30</sub>H<sub>52</sub>N<sub>4</sub>O<sub>9</sub> [M+H]<sup>+</sup> : 613.3806, found 613.3815

### N-Boc-allylcysteine-Leu-Leu-allylcysteine methyl ester (**12**)

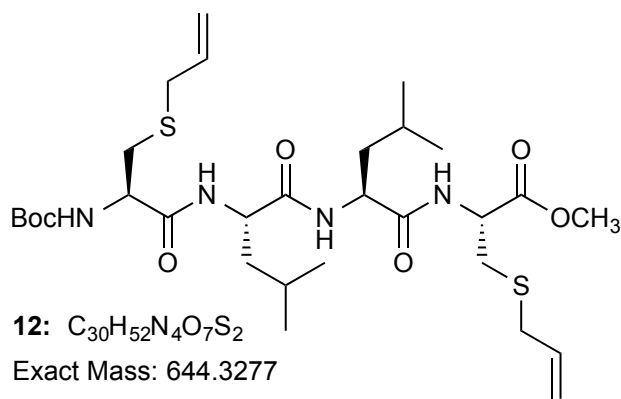

Following the procedure for the synthesis of **10**, the peptide **12** was obtained following a C- to N-terminal modification strategy. Briefly, Boc-allylcysteine-OMe **S3** (0.40 g, 1.4 mmol) was deprotected in TFA (4 mL, 30 eq.) and CH<sub>2</sub>Cl<sub>2</sub> (15 mL), followed by the addition of Boc-Leu-OH (0.35 g, 1.5 mmol, 1.1 eq.) HOBt (0.23 g, 1.5 mmol), HBTU (0.57 g, 1.5 mmol, 1.1 eq.), in DMF (4 mL) and DIEA (0.5 mL). After completion of the reaction, H<sub>2</sub>O (15 mL) was added

followed by extraction with EtOAc (3 x 15 mL) and drying with MgSO<sub>4</sub>. The residue was then deprotected with TFA (4 mL) in CH<sub>2</sub>Cl<sub>2</sub> (15 mL), from which a solution of Boc-Leu-OH (0.35 g, 1.5 mmol, 1.1 eq.) HOBt (0.23 g, 1.5 mmol, 1.1 eq.), HBTU (0.57 g, 1.5 mmol, 1.1 eq.) in DMF (4 mL) and DIEA (0.5 mL) was added and the reaction stirred for 4 h. H<sub>2</sub>O (15 mL) was added and the crude mixture extracted with EtOAc (3 x 15 mL). The organic layers were washed with 1 M LiCl (2 x 20 mL), dried over MgSO<sub>4</sub>, filtered and concentrated to dryness. The crude residue was dissolved in CH<sub>2</sub>Cl<sub>2</sub> (15 mL) and TFA (4 mL) and allowed to stir for 2 h, concentrated *in vacuo* and to this was added a solution of Boc-S-allylcysteine-OH **S7** (0.39 g, 1.5 mmol, 1.1 eq.) HOBt (0.23 g, 1.5 mmol), HBTU (0.57 g, 1.5 mmol), DIEA (0.5 mL) and DMF (4 mL). After completion of the reaction as judged by LCMS, H<sub>2</sub>O (15 mL) was added, followed by EtOAc (15 mL). The organic layer was removed and the aqueous layer extracted with EtOAc (3 x 15 mL). The combined organic layers were washed with 1 M LiCl (3 x 15 mL), dried over MgSO<sub>4</sub>, filtered, and concentrated to dryness. The crude

residue was purified by column chromatography (SiO<sub>2</sub>; 0% to 20% EtOAc in CH<sub>2</sub>Cl<sub>2</sub>) to afford 0.46 g (51%) the product **12** as a clear oil. <sup>1</sup>H NMR (500 MHz, CDCl<sub>3</sub>) δ 7.73 (d, J = 7.6 Hz, 1H), 7.56–7.49 (m, 2H), 5.80 (d, J = 7.6 Hz, 1H), 5.76–5.64 (m, 2H), 5.27–5.04 (m, 4H), 4.85–4.58 (m, 3H), 4.52–4.51 (m, 1H), 3.72 (s, 3H), 3.11–3.02 (m, 4H), 2.92–2.88 (m, 1H), 2.85–2.68 (m, 3H), 1.75–1.46 (m, 6H), 1.40 (s, 9H), 0.89–0.84 (m, 12H). <sup>13</sup>C NMR (126 MHz, CDCl<sub>3</sub>) δ 172.09, 171.56, 171.20, 170.84, 155.55, 133.81, 133.68, 117.79, 117.73, 79.95, 77.31, 54.00, 52.47, 51.95, 51.86, 51.51, 41.73, 41.30, 35.17, 34.89, 33.55, 32.20, 28.31 (3C), 24.80, 24.73, 22.85, 22.65, 22.58, 22.39. HRMS (ESI) m/z calcd for C<sub>30</sub>H<sub>52</sub>N<sub>4</sub>O<sub>7</sub>S<sub>2</sub> [M+H]<sup>+</sup>: 645.3349, found 645.3356

### N-Boc-allylglycine-Pro-Gly-allylglycine methyl ester (**13**)

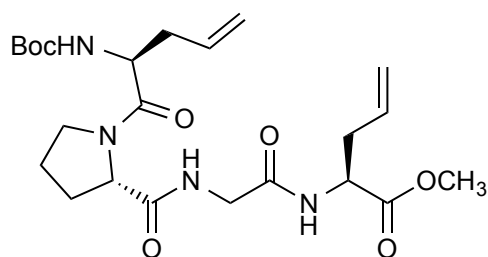

**13**: C<sub>23</sub>H<sub>36</sub>N<sub>4</sub>O<sub>7</sub>

Exact Mass: 480.2584

Following the procedure for the synthesis of **10**, the peptide **13** was obtained following a C- to N-terminal modification strategy. Briefly, Boc-allylglycine-OMe **S1** (0.50 g, 2.2 mmol) was deprotected in TFA (5 mL, 30 eq.) and CH<sub>2</sub>Cl<sub>2</sub> (22 mL), followed by the addition of Boc-Gly-OH (0.42 g, 2.4 mmol, 1.1 eq.) HOBt (0.37 g, 2.4 mmol), HBTU (0.91 g, 2.4 mmol, 1.1 eq.), in DMF (5 mL) and DIEA (1.0 mL). After completion of the reaction, H<sub>2</sub>O (20 mL) was added followed by extraction with EtOAc (3 x 20 mL) and drying with

MgSO<sub>4</sub>. The residue was then deprotected with TFA (5 mL) in CH<sub>2</sub>Cl<sub>2</sub> (22 mL), from which a solution of Boc-Pro-OH (0.52 g, 2.4 mmol, 1.1 eq.) HOBt (0.37 g, 2.4 mmol, 1.1 eq.), HBTU (0.91 g, 2.4 mmol, 1.1 eq.) in DMF (5 mL) and DIEA (1.0 mL) was added and the reaction stirred for 4 h. H<sub>2</sub>O (20 mL) was added and the crude mixture extracted with EtOAc (3 x 20 mL). The organic layers were washed with 1 M LiCl (2 x 20 mL), dried over MgSO<sub>4</sub>, filtered and concentrated to dryness. The crude residue was dissolved in CH<sub>2</sub>Cl<sub>2</sub> (22 mL) and TFA (5 mL) and allowed to stir for 2 h, concentrated *in vacuo* and to this was added a solution of Boc-allylglycine-OH (0.52 g, 2.4 mmol, 1.1 eq.) HOBt (0.37 g, 2.4 mmol), HBTU (0.91 g, 2.4 mmol), DIEA (1.0 mL) and DMF (5 mL). After completion of the reaction as judged by LCMS, H<sub>2</sub>O (20 mL) was added, followed by EtOAc (20 mL). The organic layer was removed and the aqueous layer extracted with EtOAc (3 x 20 mL). The combined organic layers were washed with 1 M LiCl (3 x 20 mL), dried over MgSO<sub>4</sub>, filtered, and concentrated to dryness. The crude residue was purified by column chromatography (SiO<sub>2</sub>; 50% EtOAc in CH<sub>2</sub>Cl<sub>2</sub> + 5% MeOH) to afford 0.39 g (37%) of the product **13** as a clear oil. <sup>1</sup>H NMR (500 MHz, CDCl<sub>3</sub>, *cis and trans rotamers*) δ 7.53–7.35 (m, 1H), 7.31–7.28 (m, 1H), 5.81–5.68 (m, 2H), 5.35–5.33 (m, 1H), 5.19–5.07 (m, 4H), 4.62–4.44 (m, 3H), 4.13–4.08 (m, 1H), 3.94–3.75 (m, 3H), 3.71 (s, 3H), 3.66–3.63 (m, 1H), 2.61–2.34 (m, 4H), 2.24–1.95 (m, 4H), 1.42 (s, 9H). <sup>13</sup>C NMR (126 MHz, CDCl<sub>3</sub>, *cis and trans rotamers*) δ 172.04, 171.89, 171.77, 171.70, 171.64, 171.49, 169.26, 169.00, 155.95, 155.28, 133.22, 132.79, 132.54, 132.30, 119.37, 118.79, 118.63, 118.51, 80.36, 79.69, 77.32, 60.88, 60.58, 52.24, 52.07, 51.56, 47.53, 47.46, 43.19, 42.99, 36.92, 36.04, 35.95, 29.04, 28.29 (3C), 28.25, 28.20, 25.19. HRMS (ESI) m/z calcd for C<sub>23</sub>H<sub>36</sub>N<sub>4</sub>O<sub>7</sub> [M+H]<sup>+</sup>: 481.2656, found 481.2664

## N-Boc-allylglycine-His(Tos)-Gly-allylglycine methyl ester (**14**)

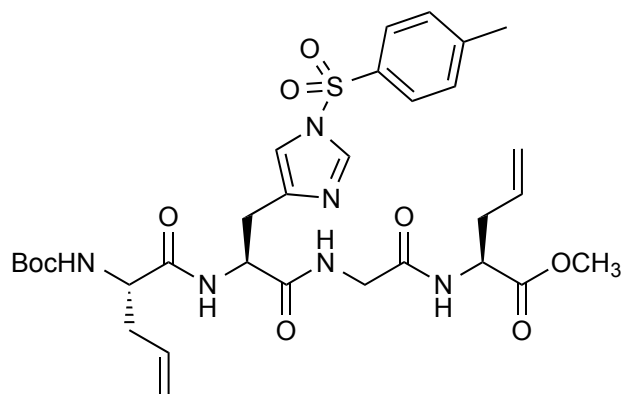

**14**: C<sub>31</sub>H<sub>42</sub>N<sub>6</sub>O<sub>9</sub>S

Exact Mass: 674.2734

Following the procedure for the synthesis of **10**, the peptide **14** was obtained following a C- to N-terminal modification strategy. Briefly, Boc-allylglycine-OMe **S1** (0.41 g, 1.8 mmol) was deprotected in TFA (4 mL, 30 eq.) and CH<sub>2</sub>Cl<sub>2</sub> (18 mL), followed by the addition of Boc-Gly-OH (0.35 g, 2.0 mmol, 1.1 eq.) HOBt (0.31 g, 2.0 mmol), HBTU (0.76 g, 2.0 mmol, 1.1 eq.), in DMF (4 mL) and DIEA (0.5 mL). After completion of the reaction, H<sub>2</sub>O (15 mL) was added followed by extraction with EtOAc (3 x 15 mL) and drying with MgSO<sub>4</sub>. The residue was then deprotected with TFA (4 mL) in CH<sub>2</sub>Cl<sub>2</sub> (18 mL), from which a solution of Boc-His(Tos)-OH (0.82 g, 2.0 mmol, 1.1 eq.) HOBt (0.31 g, 2.0 mmol, 1.1 eq.), HBTU (0.76 g, 2.0 mmol, 1.1 eq.) in DMF (4 mL) and DIEA (0.5 mL) was added and the reaction stirred for 4 h. H<sub>2</sub>O (15 mL) was added and the crude mixture extracted with EtOAc (3 x 15 mL). The organic layers were washed with 1 M LiCl (2 x 15 mL), dried over MgSO<sub>4</sub>, filtered and concentrated to dryness. The crude residue was dissolved in CH<sub>2</sub>Cl<sub>2</sub> (18 mL) and TFA (4 mL) and allowed to stir for 2 h, concentrated *in vacuo* and to this was added a solution of Boc-allylglycine-OH (0.43 g, 2.0 mmol, 1.1 eq.) HOBt (0.31 g, 2.0 mmol), HBTU (0.76 g, 2.0 mmol), DIEA (0.50 mL) and DMF (4.0 mL). After completion of the reaction as judged by LCMS, H<sub>2</sub>O (15 mL) was added, followed by EtOAc (15 mL). The organic layer was removed and the aqueous layer extracted with EtOAc (3 x 15 mL). The combined organic layers were washed with 1 M LiCl (3 x 15 mL), dried over MgSO<sub>4</sub>, filtered, and concentrated to dryness. The crude residue was purified by column chromatography (SiO<sub>2</sub>; 50% EtOAc in CH<sub>2</sub>Cl<sub>2</sub> + 5% MeOH) to afford 0.29 g (24%) of the product **14** as a clear oil. <sup>1</sup>H NMR (500 MHz, CDCl<sub>3</sub>) δ 8.09–7.96 (m, 1H), 7.91–7.83 (m, 2H), 7.46–7.40 (m, 2H), 7.17 (d, *J* = 7.5 Hz, 1H), 5.79–5.70 (m, 2H), 5.26–5.06 (m, 5H), 4.73–4.59 (m, 2H), 4.12–3.94 (m, 2H), 3.77 (s, 3H), 3.44–3.19 (m, 2H), 3.01–2.87 (m, 1H), 2.85 (s, 3H), 2.70–2.42 (m, 7H), 1.46 (s, 9H). <sup>13</sup>C NMR (126 MHz, CDCl<sub>3</sub>) δ 172.34, 171.99, 171.01, 168.79, 156.48, 146.75, 140.19, 136.55, 134.60, 132.98, 132.78, 132.57, 132.52, 130.53, 130.51, 127.42, 127.40, 119.65, 115.22, 81.00, 61.73, 55.19, 53.65, 52.90, 51.97, 43.18, 38.61, 36.30, 36.09, 28.26 (3C), 21.77. HRMS (ESI) *m/z* calcd for C<sub>31</sub>H<sub>42</sub>N<sub>6</sub>O<sub>9</sub>S [M+H]<sup>+</sup>: 675.2815, found 675.2831



## General procedure for RCM on peptides bearing i, i+2 and i, i+3 crosslinks

### (7*S*,10*S*,13*S*)-13-((*tert*-butoxycarbonyl)amino)-10-isobutyl-9,12-dioxo-2-oxa-8,11-diaza-1(1,4)-benzenacyclotetradecaphan-4-ene-7 methyl ester (**9a**)

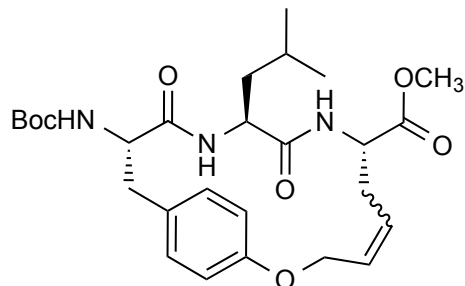

**9a:** C<sub>27</sub>H<sub>39</sub>N<sub>3</sub>O<sub>7</sub>

Exact Mass: 517.2788

In a typical procedure, a flask was charged with a solution of compound **8a** (0.10 g, 0.18 mmol) in anhydrous and degassed DCE (2 mM, 90 mL) under Ar(g). A solution of catalyst **1-7** (10 mol %) in DCE (3 mL) was added. The reaction mixture was heated at 40 °C for 4 h, allowed to cool, and quenched with an excess of ethyl vinyl ether (5 mL). The reaction was concentrated *in vacuo* and the crude residue purified by column chromatography (SiO<sub>2</sub>; 0% to 33% EtOAc in hexane) (R<sub>f</sub> = 0.32 in 1:1 Hexanes:EtOAc) to afford 80.0 mg (86%) of the product **9a** as a white solid. <sup>1</sup>H NMR (500 MHz, CDCl<sub>3</sub>) δ 7.10 (bs, 2H), 6.77 (bs, 2H), 6.03 (d, *J* = 8.7 Hz, 1H), 5.91 (d, *J* = 7.3 Hz, 1H), 5.59–5.47 (m, 2H), 5.44 (d, *J* = 7.4 Hz, 1H), 4.80–4.75 (m, 1H), 4.69–4.59 (m, 2H), 4.27–4.20 (m, 2H), 3.78 (s, 3H), 3.12 (dd, *J* = 12.7, 4.9 Hz, 1H), 2.78–2.69 (m, 2H), 2.38–2.31 (m, 1H), 1.61–1.59 (m, 2H), 1.49 (s, 9H), 0.93–0.87 (m, 6H). <sup>13</sup>C NMR (126 MHz, CDCl<sub>3</sub>) δ 171.95, 171.02, 170.69, 156.09, 155.08, 129.73 (2C), 128.48, 128.12, 127.48, 115.56 (2C), 79.85, 66.41, 57.12, 52.60, 51.81, 51.68, 42.91, 38.86, 34.88, 28.33 (3C), 24.34, 22.75, 22.49. HRMS (ESI) *m/z* calcd for C<sub>27</sub>H<sub>39</sub>N<sub>3</sub>O<sub>7</sub> [M+H]<sup>+</sup> : 518.2860, found 518.2877

### (8*S*,11*S*,14*S*)-14-((*tert*-butoxycarbonyl)amino)-11-isobutyl-10,13-dioxo-2-oxa-9,12-diaza-1(1,4)-benzenacyclopentadecaphan-4-ene-8 methyl ester (**9b**)

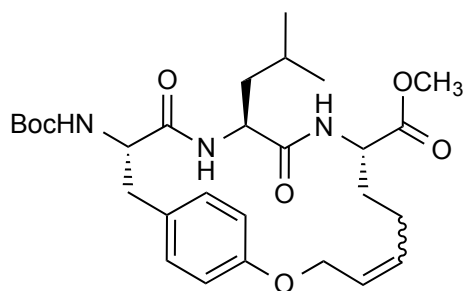

**9b:** C<sub>28</sub>H<sub>41</sub>N<sub>3</sub>O<sub>7</sub>

Exact Mass: 531.2945

Following the general procedure for **9a**, the peptide **8b** (0.10 g, 0.18 mmol) was reacted with catalysts **1-7** (10 mol%) in DCE (90 mL) to afford product **9b** (74.3 mg, 79%) as a colorless glass and as a 2:1 mixture of isomers after purification by flash chromatography (SiO<sub>2</sub>; 1:1 DCM:EtOAc + 1 to 5% MeOH) (R<sub>f</sub> = 0.35 in 4:1 DCM:EtOAc). <sup>1</sup>H NMR for *major isomer* (500 MHz, CDCl<sub>3</sub>) δ 7.13 (d, *J* = 8.4 Hz, 2H), 6.89–6.76 (m, 2H), 6.07 (d, *J* = 7.4 Hz, 1H), 6.01 (d, *J* = 7.8 Hz, 1H), 5.66–5.58 (m, 2H), 5.30 (d, *J* = 8.4 Hz, 1H), 5.02–4.96 (m, 1H), 4.52–4.48 (m, 1H), 4.37–4.31 (m, 1H), 4.29–4.13 (m, 4H), 3.79 (s, 3H), 3.09–3.02 (m, 1H), 2.96–2.87 (m, 1H), 2.64–2.53 (m, 1H), 2.49–2.44 (m, 2H), 2.40–2.28 (m, 1H), 2.10–1.91 (m, 1H), 1.67–1.52 (m, 2H), 1.50 (s, 9H), 0.93–0.90 (m, 6H). <sup>13</sup>C NMR for *major isomer* (126 MHz, CDCl<sub>3</sub>) δ 171.90, 170.83, 170.46, 156.72, 155.16, 130.21, 129.99 (2C), 128.95, 128.19, 126.06, 115.78 (2C), 80.04, 65.54, 56.90, 52.49, 51.65, 50.83, 42.23, 38.07, 35.50, 30.59, 28.32 (3C), 24.35, 22.77. HRMS (ESI) *m/z* calcd for C<sub>28</sub>H<sub>41</sub>N<sub>3</sub>O<sub>7</sub> [M+H]<sup>+</sup> : 532.3017, found 532.3018

**(9*S*,12*S*,15*S*)-15-((*tert*-butoxycarbonyl)amino)-12-isobutyl-11,14-dioxo-2-oxa-10,13-diaza-1(1,4)-benzenacyclohexadecaphan-5-ene-9 methyl ester (9c)**

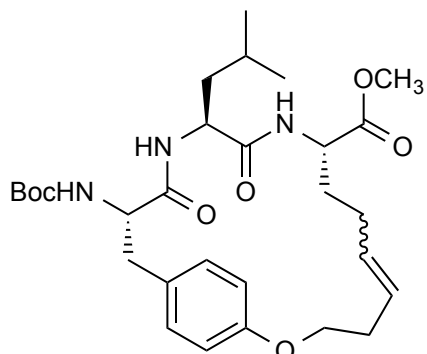

**9c:** C<sub>29</sub>H<sub>43</sub>N<sub>3</sub>O<sub>7</sub>

Exact Mass: 545.3101

Following the general procedure for **9a**, the peptide **8c** (0.10 g, 17 mmol) was reacted with catalysts **1-7** (10 mol%) in DCE (90 mL) to afford product **9c** (64.6 mg, 68%) as a colorless glass after purification by flash chromatography (SiO<sub>2</sub>; 1:1 DCM:EtOAc + 1 to 4% MeOH) (R<sub>f</sub> = 0.45 in 1:1 Hexanes:EtOAc). <sup>1</sup>H NMR (500 MHz, CDCl<sub>3</sub>) δ 7.08 (d, *J* = 8.4 Hz, 2H), 6.80–6.73 (m, 2H), 6.14 (d, *J* = 7.8 Hz, 1H), 6.04 (d, *J* = 7.7 Hz, 1H), 5.56–5.46 (m, 2H), 5.29 (d, *J* = 8.4 Hz, 1H), 4.38 (td, *J* = 7.9, 5.8 Hz, 1H), 4.30–4.14 (m, 4H), 4.10–4.01 (m, 1H), 3.77 (s, 3H), 3.07–2.86 (m, 2H), 2.51–2.34 (m, 2H), 2.10–1.82 (m, 4H), 1.67–1.54 (m, 4H), 1.50 (s, 9H), 0.94 (dd, *J* = 8.6, 6.6 Hz, 6H). <sup>13</sup>C NMR (126 MHz, CDCl<sub>3</sub>) δ 172.67, 170.67, 170.42, 158.46,

155.21, 131.00, 129.98, 128.90, 128.02, 115.74, 115.23, 80.04, 67.36, 56.34, 52.30, 51.11, 51.06, 41.86, 37.86, 33.04, 32.12, 28.33 (3C), 27.66, 24.37, 22.96, 22.12. HRMS (ESI) *m/z* calcd for C<sub>29</sub>H<sub>43</sub>N<sub>3</sub>O<sub>7</sub> [M+H]<sup>+</sup>: 546.3173, found 546.3188

**(2*S*,5*S*,8*S*,13*S*)-13-((*tert*-butoxycarbonyl)amino)-2,5-diisobutyl-3,6,14-trioxo-1,4,7-triazacyclotetradec-10-ene-8 benzyl ester (15)**

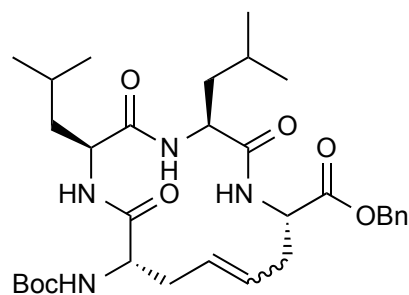

**15:** C<sub>32</sub>H<sub>48</sub>N<sub>4</sub>O<sub>7</sub>

Exact Mass: 600.3523

Following the general procedure for **9a**, the peptide **10** (0.10 g, 16 mmol) was reacted with catalysts **1-7** (10 mol%) in DCE (90 mL) to afford product **15** (80.2 mg, 84%) as a white solid after purification by flash chromatography (SiO<sub>2</sub>; 0 to 50% hexanes in EtOAc) (R<sub>f</sub> = 0.55 in 4:1 DCM:EtOAc). <sup>1</sup>H NMR (500 MHz, CDCl<sub>3</sub>) δ 7.45–7.32 (m, 5H), 7.13 (bs, 1H), 6.99 (d, *J* = 8.6 Hz, 1H), 5.87 (d, *J* = 9.9 Hz, 1H), 5.48–5.39 (m, 1H), 5.35–5.30 (m, 1H), 5.25 (d, *J* = 12.6 Hz, 1H), 5.18 (d, *J* = 12.6 Hz, 1H), 5.10 (d, *J* = 8.0 Hz, 1H), 4.78–4.73 (m, 1H), 4.67–4.62 (m, 1H), 4.17–4.07 (m, 2H), 3.14–3.02 (m, 2H), 2.52–2.48 (m, 1H), 2.07 (m, 1H),

1.97 (d, *J* = 10.6 Hz, 1H), 1.85–1.78 (m, 2H), 1.75–1.70 (m, 1H), 1.64–1.51 (m, 2H), 1.49 (s, 9H), 1.03–0.92 (m, 12H). <sup>13</sup>C NMR (126 MHz, CDCl<sub>3</sub>) δ 173.36, 171.72, 171.20, 171.08, 156.08, 135.68, 130.47, 128.53 (2C), 128.07, 127.77, 126.15 (2C), 81.10, 66.78, 55.46, 53.05, 51.64, 50.58, 40.10, 39.73, 28.95, 28.19 (3C), 27.97, 24.95, 24.60, 23.38, 23.31, 21.18, 20.96. HRMS (ESI) *m/z* calcd for C<sub>32</sub>H<sub>48</sub>N<sub>4</sub>O<sub>7</sub> [M+H]<sup>+</sup>: 601.3595, found 601.3609

**(3*S*,6*S*,9*S*,12*S*)-12-((*tert*-butoxycarbonyl)amino)-6,9-diisobutyl-5,8,11-trioxo-1,14-dioxo-4,7,10-triazacyclooctadec-16-ene-3 methyl ester (**16**)**

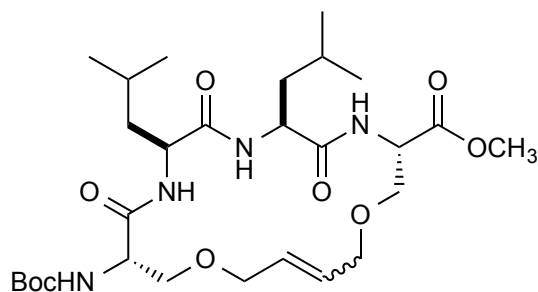

**16:** C<sub>28</sub>H<sub>48</sub>N<sub>4</sub>O<sub>9</sub>  
Exact Mass: 584.3421

Following the general procedure for **9a**, the peptide **11** (0.10 g, 16 mmol) was reacted with catalysts **1-7** (10 mol%) in DCE (90 mL) to afford product **16** (83.0 mg, 88%) as a white solid after purification by flash chromatography (SiO<sub>2</sub>; 0 to 33% EtOAc in hexanes) (R<sub>f</sub> = 0.26 in 2:1 DCM:EtOAc). <sup>1</sup>H NMR (500 MHz, CDCl<sub>3</sub>) δ 7.27 (d, J = 7.4 Hz, 1H), 7.24 (d, J = 7.5 Hz, 1H), 6.47 (d, J = 7.3 Hz, 1H), 5.95–5.80 (m, 2H), 5.50 (d, J = 5.8 Hz, 1H), 4.74–4.71 (m, 1H), 4.51–4.42 (m, 2H), 4.34 (bs, 1H), 4.26–4.13 (m, 2H), 4.04–3.98 (m, 1H), 3.89–3.84 (m, 2H), 3.80 (s, 3H), 3.76–3.65 (m, 2H), 3.50 (bs, 1H), 1.90–1.86 (m, 1H), 1.79–1.50 (m, 5H), 1.48 (s, 9H), 0.99–0.94 (m, 12H). <sup>13</sup>C NMR (126 MHz, CDCl<sub>3</sub>) δ 172.14, 171.39, 170.78, 170.27, 155.67, 129.47, 127.79, 80.34, 71.14, 70.24, 69.61, 69.48, 53.58, 52.81, 52.63, 52.52, 52.44, 40.85, 39.33, 28.26 (3C), 24.86, 24.81, 23.16, 22.91, 21.78, 21.55. HRMS (ESI) m/z calcd for C<sub>28</sub>H<sub>48</sub>N<sub>4</sub>O<sub>9</sub> [M+H]<sup>+</sup>: 585.3493, found 585.3509

**(3*R*,6*S*,9*S*,12*R*)-12-((*tert*-butoxycarbonyl)amino)-6,9-diisobutyl-5,8,11-trioxo-1,14-dithia-4,7,10-triazacyclooctadec-16-ene-3 methyl ester (**17**)**

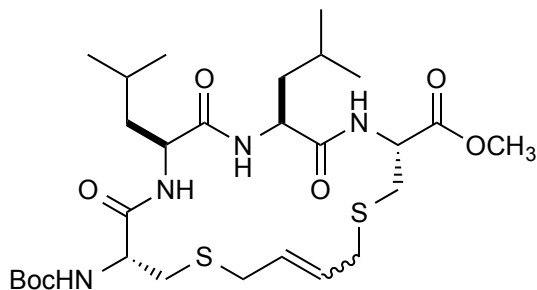

**17:** C<sub>28</sub>H<sub>48</sub>N<sub>4</sub>O<sub>7</sub>S<sub>2</sub>  
Exact Mass: 616.2964

Following the general procedure for **9a**, the peptide **12** (0.10 g, 15 mmol) was reacted with catalysts **1-7** (10 mol%) in DCE (90 mL) to afford product **17** (77.4 mg, 81%) as a colorless glass after purification by flash chromatography (SiO<sub>2</sub>; 0 to 20% EtOAc in hexanes) (R<sub>f</sub> = 0.28 in 3:1 DCM:EtOAc). <sup>1</sup>H NMR (500 MHz, CDCl<sub>3</sub>) δ 7.18 (d, J = 8.5 Hz, 1H), 7.06 (d, J = 8.8 Hz, 1H), 6.71 (d, J = 4.6 Hz, 1H), 5.71–5.53 (m, 2H), 5.33 (d, J = 4.2 Hz, 1H), 4.84–4.72 (m, 1H), 4.65–4.61 (m, 1H), 4.36–4.24 (m, 2H), 3.79 (s, 3H), 3.31–3.18 (m, 4H), 3.09–3.01 (m, 2H), 2.76–2.69 (m, 1H), 1.98–1.92 (m, 1H), 1.83–1.72 (m, 2H), 1.66–1.55 (m, 4H), 1.51 (s, 9H), 1.02–0.95 (m, 12H). <sup>13</sup>C NMR (126 MHz, CDCl<sub>3</sub>) δ 172.25, 171.79, 171.39, 171.02, 156.56, 129.58, 129.25, 81.48, 55.15, 54.20, 52.64, 51.75, 51.21, 40.29, 40.01, 35.19, 33.31, 32.53, 28.17 (3C), 25.09, 24.95, 23.25, 23.13, 21.44, 21.16. HRMS (ESI) m/z calcd for C<sub>28</sub>H<sub>48</sub>N<sub>4</sub>O<sub>7</sub>S<sub>2</sub> [M+H]<sup>+</sup>: 617.3036, found 617.3039

**methyl (6*S*,11*S*,16*aS*)-11-((*tert*-butoxycarbonyl)amino)-1,4,12-trioxo-1,2,3,4,5,6,7,10,11,12,14,15,16,16*a*-tetradecahydropyrrolo[1,2-*a*][1,4,7]triazacyclotetradecine-6 methyl ester (**18**)**

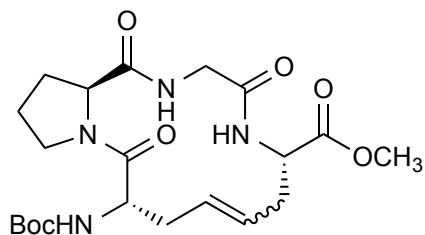

**18:** C<sub>21</sub>H<sub>32</sub>N<sub>4</sub>O<sub>7</sub>

Exact Mass: 452.2271

Following the general procedure for **9a**, the peptide **13** (0.10 g, 21 mmol) was reacted with catalysts **1-7** (10 mol%) in DCE (90 mL) to afford product **18** (52.7 mg, 56%) as a colorless oil after purification by flash chromatography (SiO<sub>2</sub>; 1:1 CH<sub>2</sub>Cl<sub>2</sub> in EtOAc + 2 to 5% MeOH) (R<sub>f</sub> = 0.28 and 0.26 in 1:1 DCM:EtOAc + 10% MeOH). <sup>1</sup>H NMR (500 MHz, CDCl<sub>3</sub>, *cis* and *trans* rotamers) δ 7.45 (d, *J* = 7.8 Hz, 1H), 7.05–7.03 (m, 1H), 5.69 (d, *J* = 7.9 Hz, 1H), 5.47–5.44 (m, 1H), 5.38–5.36 (m, 2H), 4.90–4.86 (m, 1H), 4.69–4.64 (m, 2H), 4.44–4.37 (m, 2H), 3.84 (s, 2H), 3.78 (s, 3H), 3.66–3.64 (m, 2H), 2.65–2.64 (m, 1H), 2.53–2.47 (m, 2H), 2.38–2.30 (m, 2H), 2.17–2.12 (m, 2H), 2.03–1.89 (m, 6H), 1.49 (s, 9H). <sup>13</sup>C NMR (126 MHz, CDCl<sub>3</sub> *cis* and *trans* rotamers) δ 172.18, 171.77, 170.80, 168.63, 154.95, 154.84, 128.86, 128.77, 128.26, 127.99, 80.11, 79.69, 60.64, 59.44, 52.72, 52.25, 51.77, 51.25, 47.40, 43.87, 33.74, 33.69, 28.39, 28.34, 27.68, 26.75, 26.65, 26.11, 25.91, 25.84, 25.39, 25.35. HRMS (ESI) *m/z* calcd for C<sub>21</sub>H<sub>32</sub>N<sub>4</sub>O<sub>7</sub> [M+H]<sup>+</sup>: 453.2343, found 453.2348

**General procedure for Z-selective ethenolysis on macrocyclic peptides**

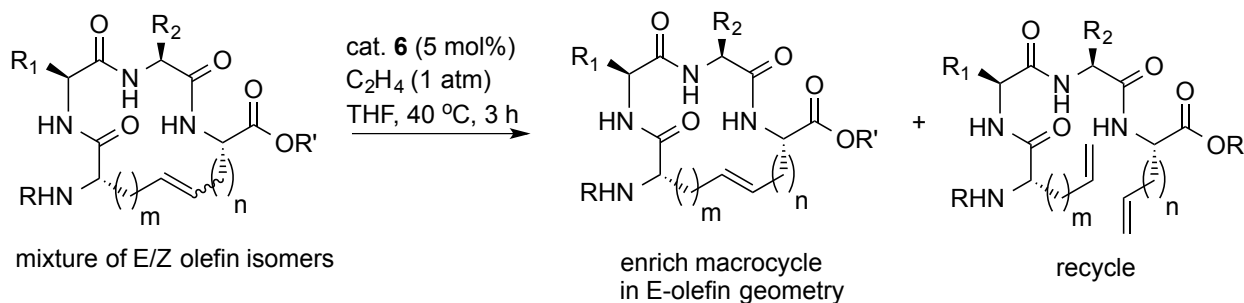

A solution of macrocycle **8a-c** or **15-18** (25.0 mg, mmol) in THF (1 mL) was prepared in a 4 mL vial and sealed with a septum cap. Catalyst **6** (5 mol%) was added as a solution in THF (0.5 mL). The sealed vial was evacuated with ethylene (3 x) and then stirred under an ethylene atmosphere. The reaction was heated to 40 °C for 3 h, then quenched with ethyl vinyl ether and concentrated. The progress of ethenolysis and its influence on olefin selectivity was monitored by LC/MS (Agilent 1100, XDB-C<sub>18</sub> 3 μm, 4.6 x 50 mm) after independently confirming the product distribution and ratio by NMR. After ethenolysis, the residue was purified by flash chromatography to provide the product enriched highly in the E-isomer. Isolated yields of the pure macrocycles and recovered diene were determined and the recovered diene could be re-exposed to the RCM and ethenolysis

conditions to provide highly enriched macrocyclic peptides in the *E*-olefin geometry. One notable exception was the lack of efficient ethenolysis for compound **18**.

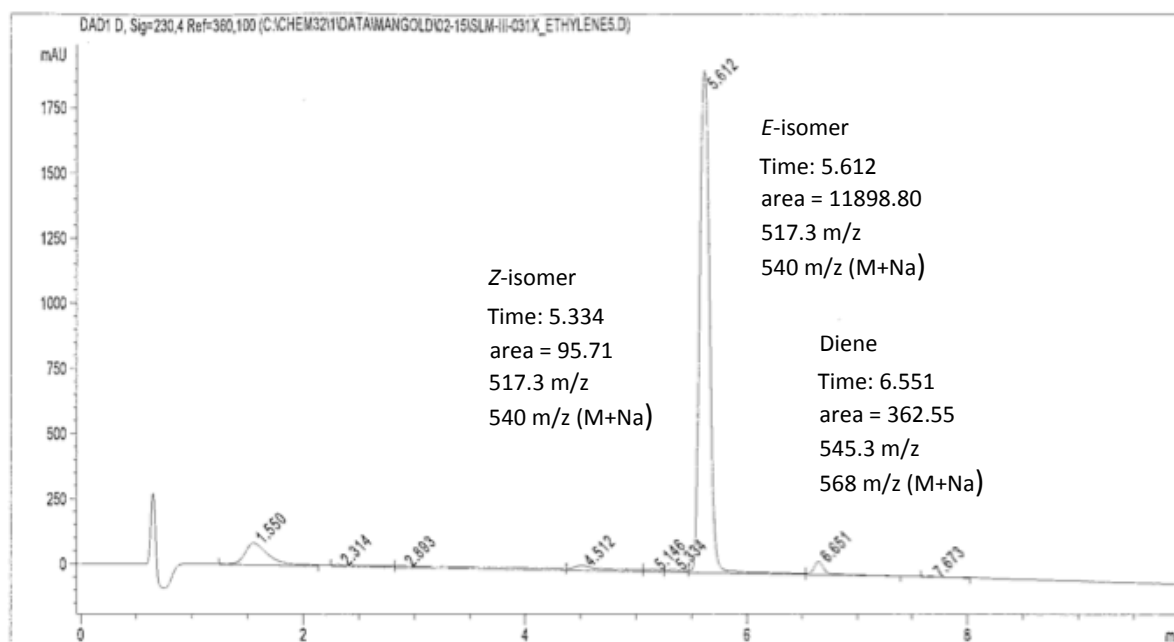

| Peak       | Start (min) | R <sub>t</sub> (min) | End (min) | Height (mAu) | Area (mAu*S) | Area%  |
|------------|-------------|----------------------|-----------|--------------|--------------|--------|
| 1          | 1.241       | 1.550                | 2.135     | 84.91529     | 1275.97473   |        |
| 2          | 2.248       | 2.314                | 2.822     | 7.22604      | 159.40733    |        |
| 3          | 2.822       | 2.893                | 4.372     | 5.68447      | 541.43036    |        |
| 4          | 4.372       | 4.512                | 5.065     | 18.47627     | 384.04123    |        |
| 5          | 5.065       | 5.146                | 5.252     | 8.47814      | 82.83534     |        |
| 6 Z isomer | 5.262       | 5.334                | 5.470     | 9.17596      | 95.70734     | 0.774  |
| 7 E isomer | 5.470       | 5.612                | 6.534     | 1930.46619   | 11898.8011   | 96.292 |
| 8 Diene    | 6.534       | 6.651                | 7.395     | 50.67454     | 362.54980    | 2.933  |
| 9          | 7.395       | 7.673                | 8.021     | 1.35541      | 17.83647     |        |

**Figure S1:** LCMS to assess the conversion and olefin selectivity for *Z*-selective ethenolysis on macrocyclic peptide **9a**. The percentage of the *E*-isomer, *Z*-isomer, and resultant diene from ethenolysis was calculated from automatic integrations of each peak area. Column conditions: 20-95% acetonitrile:H<sub>2</sub>O + 0.1% AcOH

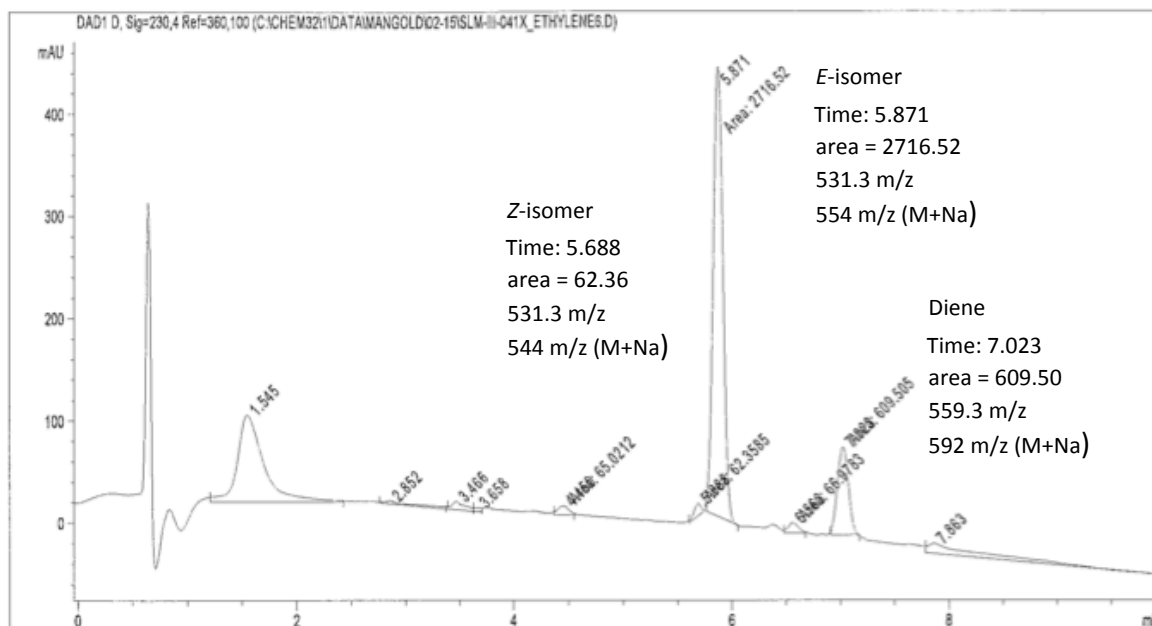

| Peak       | Start (min) | Rt (min) | End (min) | Height (mAu) | Area (mAu*S) | Area%  |
|------------|-------------|----------|-----------|--------------|--------------|--------|
| 1          | 1.209       | 1.545    | 2.428     | 85.03123     | 1413.18762   |        |
| 2          | 2.761       | 2.852    | 3.368     | 2.85201      | 58.02650     |        |
| 3          | 3.388       | 3.466    | 3.626     | 8.17150      | 70.54388     |        |
| 4          | 3.626       | 3.658    | 3.703     | 4.08593      | 18.15219     |        |
| 5          | 4.365       | 4.450    | 4.550     | 9.13793      | 65.02124     |        |
| 6 Z isomer | 5.600       | 5.688    | 5.764     | 12.36887     | 62.35853     | 1.840  |
| 7 E isomer | 5.764       | 5.871    | 6.052     | 441.34851    | 2716.52002   | 80.172 |
| 8          | 6.474       | 6.563    | 6.680     | 10.01819     | 66.97835     | 17.988 |
| 9 Diene    | 6.904       | 7.023    | 7.174     | 86.09809     | 609.50470    |        |
| 10         | 7.783       | 7.863    | 9.962     | 10.28052     | 354.32645    |        |

**Figure S2:** LCMS to assess the conversion and olefin selectivity for Z-selective ethenolysis on macrocyclic peptide **9b**. The percentage of the *E*-isomer, *Z*-isomer, and resultant diene from ethenolysis was calculated from automatic integrations of each peak area. Column conditions: 20-95% acetonitrile:H<sub>2</sub>O + 0.1% AcOH

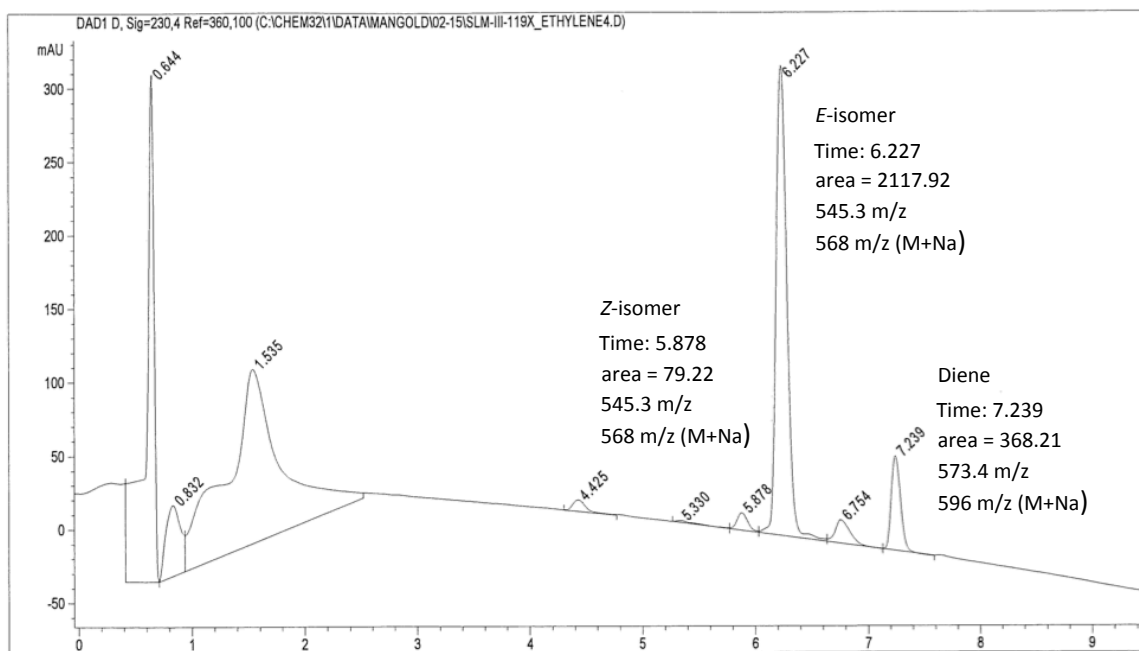

| Peak       | Start (min) | R <sub>t</sub> (min) | End (min) | Height (mAu) | Area (mAu*S) | Area%  |
|------------|-------------|----------------------|-----------|--------------|--------------|--------|
| 1          | 0.413       | 0.644                | 0.708     | 346.55182    | 1879.64746   |        |
| 2          | 0.708       | 0.832                | 0.937     | 48.39107     | 441.70938    |        |
| 3          | 0.937       | 1.535                | 2.520     | 118.63337    | 3999.27710   |        |
| 4          | 4.299       | 4.425                | 4.766     | 7.96042      | 64.57545     |        |
| 5          | 5.266       | 5.330                | 5.770     | 1.18655      | 12.70663     |        |
| 6 Z-isomer | 5.770       | 5.878                | 6.028     | 11.95232     | 79.22633     | 3.088  |
| 7 E-isomer | 6.028       | 6.227                | 6.630     | 319.69931    | 2117.91870   | 82.558 |
| 8          | 6.630       | 6.754                | 7.126     | 16.02355     | 143.06432    |        |
| 9 Diene    | 7.126       | 7.239                | 7.586     | 64.14093     | 368.21265    | 14.353 |

**Figure S3:** LCMS to assess the conversion and olefin selectivity for Z-selective ethenolysis on macrocyclic peptide **9c**. The percentage of the E-isomer, Z-isomer, and resultant diene from ethenolysis was calculated from automatic integrations of each peak area. Column conditions: 20-95% acetonitrile:H<sub>2</sub>O + 0.1% AcOH

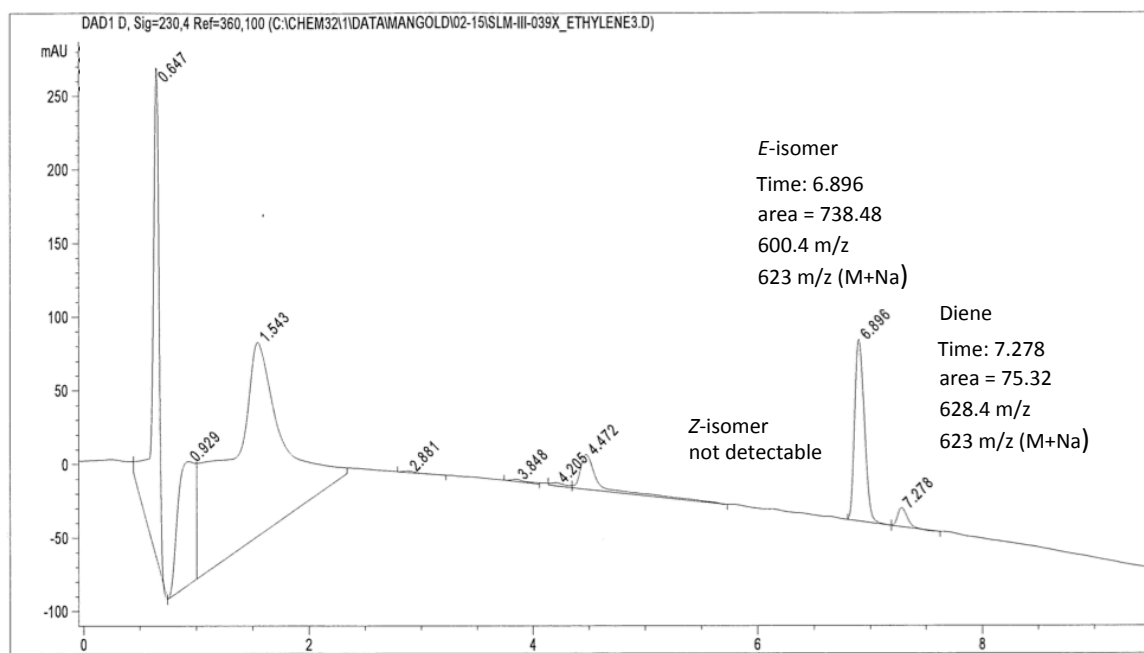

| Peak       | Start (min) | Rt (min) | End (min) | Height (mAu) | Area (mAu*S) | Area%  |
|------------|-------------|----------|-----------|--------------|--------------|--------|
| 1          | 0.444       | 0.647    | 0.745     | 336.47571    | 1372.63660   |        |
| 2          | 0.745       | 0.929    | 1.003     | 83.83356     | 903.89703    |        |
| 3          | 1.003       | 1.543    | 2.337     | 131.85921    | 4563.25537   |        |
| 4          | 2.789       | 2.881    | 3.217     | 1.07480      | 5.95085      |        |
| 5          | 3.738       | 3.848    | 4.057     | 1.46307      | 15.35340     |        |
| 6          | 4.132       | 4.205    | 4.344     | 2.21722      | 20.45081     |        |
| 7          | 4.344       | 4.472    | 5.730     | 23.62760     | 255.38373    |        |
| 8 E isomer | 6.796       | 6.896    | 7.188     | 123.37890    | 738.48621    | 90.744 |
| 9 Diene    | 7.188       | 7.278    | 7.623     | 12.95432     | 75.32767     | 9.256  |

**Figure S4:** LCMS to assess the conversion and olefin selectivity for Z-selective ethenolysis on macrocyclic peptide **15**. The percentage of the *E*-isomer, *Z*-isomer, and resultant diene from ethenolysis was calculated from automatic integrations of each peak area. Column conditions: 20-95% acetonitrile:H<sub>2</sub>O + 0.1% AcOH



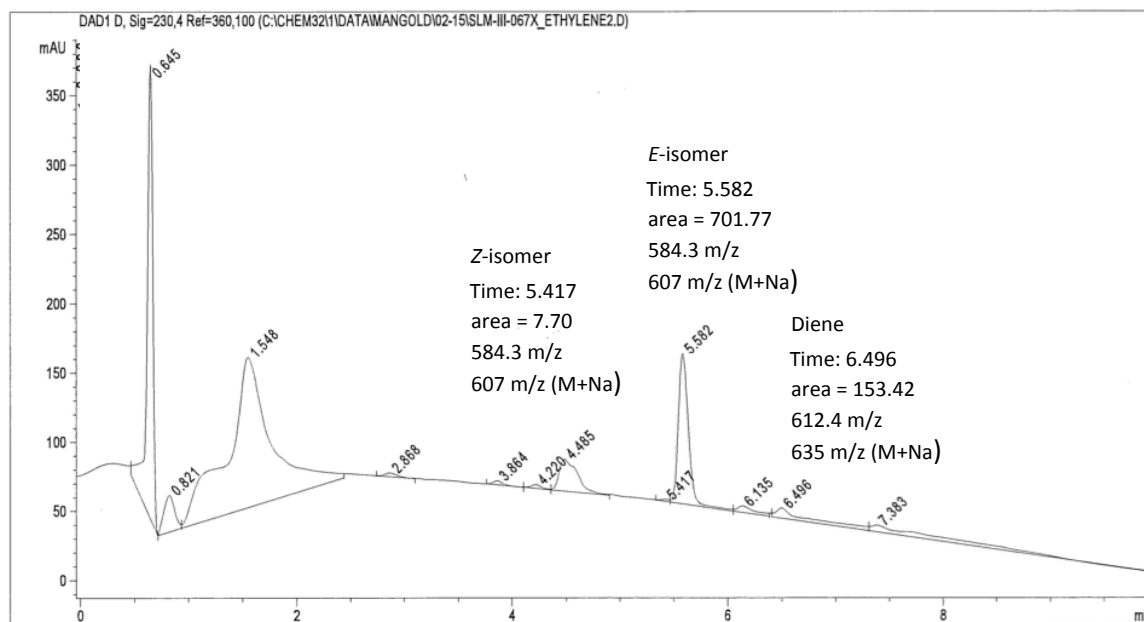

| Peak       | Start (min) | Rt (min) | End (min) | Height (mAu) | Area (mAu*S) | Area%  |
|------------|-------------|----------|-----------|--------------|--------------|--------|
| 1          | 0.466       | 0.645    | 0.712     | 328.62842    | 1207.89722   |        |
| 2          | 0.712       | 0.821    | 0.931     | 26.75960     | 188.20444    |        |
| 3          | 0.931       | 1.548    | 2.439     | 108.73872    | 3083.64160   |        |
| 4          | 2.741       | 2.868    | 3.099     | 2.80984      | 21.33830     |        |
| 5          | 3.764       | 3.864    | 4.105     | 3.18188      | 19.36922     |        |
| 6          | 4.105       | 4.220    | 4.359     | 3.03480      | 19.91151     |        |
| 7          | 4.359       | 4.485    | 4.899     | 23.28951     | 271.30936    |        |
| 8 Z isomer | 5.333       | 5.417    | 5.464     | 1.34658      | 7.70495      | 0.893  |
| 9 E isomer | 5.464       | 5.582    | 6.050     | 108.83810    | 701.77484    | 81.327 |
| 10         | 6.050       | 6.135    | 6.386     | 4.74384      | 55.14216     |        |
| 11 Diene   | 6.406       | 6.496    | 7.308     | 7.33192      | 153.42302    | 17.780 |
| 12         | 7.308       | 7.383    | 9.959     | 5.06042      | 248.79102    |        |

**Figure S5:** LCMS to assess the conversion and olefin selectivity for Z-selective ethenolysis on macrocyclic peptide **16**. The percentage of the *E*-isomer, *Z*-isomer, and resultant diene from ethenolysis was calculated from automatic integrations of each peak area. Column conditions: 20-95% acetonitrile:H<sub>2</sub>O + 0.1% AcOH.

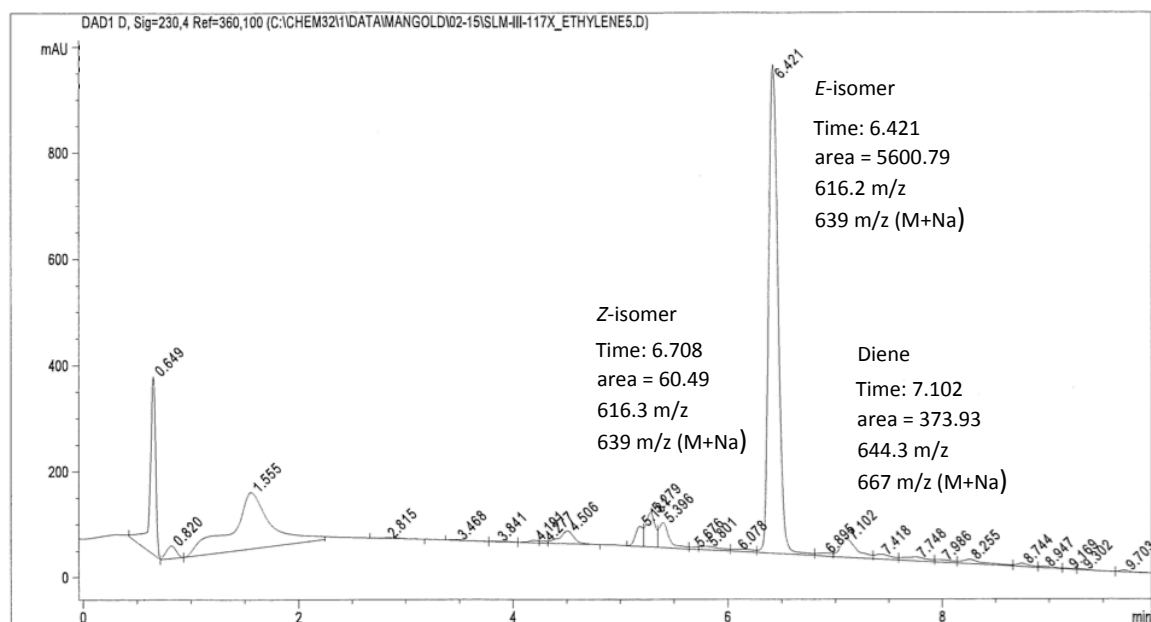

| Peak        | Start (min) | R <sub>t</sub> (min) | End (min) | Height (mAu) | Area (mAu*S) | Area%  |
|-------------|-------------|----------------------|-----------|--------------|--------------|--------|
| 1           | 0.420       | 0.649                | 0.715     | 336.21109    | 1241.97314   |        |
| 2           | 0.715       | 0.820                | 0.931     | 24.67960     | 159.74443    |        |
| 3           | 0.931       | 1.555                | 2.247     | 106.90371    | 2754.27417   |        |
| 4           | 4.044       | 4.191                | 4.242     | 4.43836      | 25.76578     |        |
| 5           | 4.242       | 4.277                | 4.326     | 4.05187      | 18.65500     |        |
| 6           | 4.326       | 4.506                | 4.807     | 24.19786     | 220.44963    |        |
| 7           | 5.061       | 5.181                | 5.213     | 38.58390     | 181.25850    |        |
| 8           | 5.213       | 5.279                | 5.346     | 65.12208     | 391.30566    |        |
| 9           | 5.346       | 5.396                | 5.639     | 47.43619     | 319.13754    |        |
| 10          | 5.639       | 5.676                | 5.725     | 4.20501      | 21.50261     |        |
| 11          | 5.725       | 5.801                | 6.024     | 6.89706      | 86.88933     |        |
| 12 Z isomer | 6.024       | 6.078                | 6.268     | 4.05960      | 60.49083     | 1.003  |
| 13 E isomer | 6.268       | 6.421                | 6.811     | 921.42847    | 5600.79346   | 92.802 |
| 14          | 6.811       | 6.895                | 6.984     | 5.87108      | 55.82880     |        |
| 15 Diene    | 6.984       | 7.102                | 7.350     | 34.27073     | 373.93195    | 6.195  |
| 16          | 7.350       | 7.418                | 7.592     | 9.25945      | 97.96252     |        |
| 17          | 7.592       | 7.748                | 7.926     | 7.32276      | 109.53992    |        |
| 18          | 7.926       | 7.986                | 8.140     | 4.98148      | 53.86921     |        |
| 19          | 8.140       | 8.255                | 8.662     | 9.04783      | 125.62745    |        |

**Figure S6:** LCMS to assess the conversion and olefin selectivity for Z-selective ethenolysis on macrocyclic peptide **17**. The percentage of the *E*-isomer, *Z*-isomer, and resultant diene from ethenolysis was calculated from automatic integrations of each peak area. Column conditions: 20-95% acetonitrile:H<sub>2</sub>O + 0.1% AcOH.

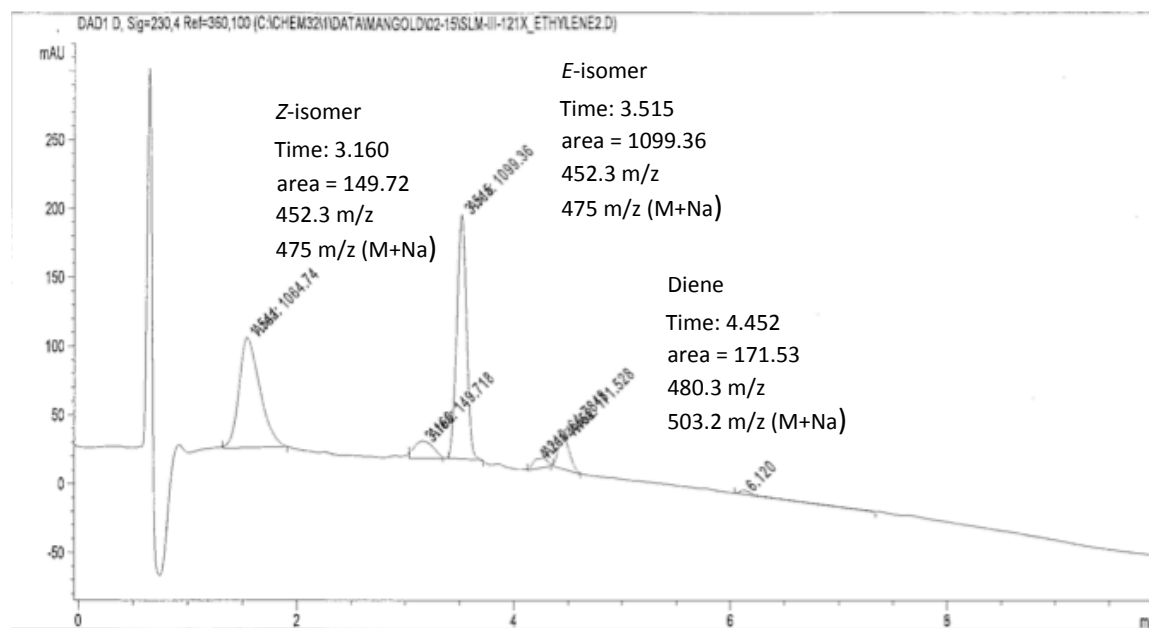

| Peak       | Start (min) | R <sub>t</sub> (min) | End (min) | Height (mAu) | Area (mAu*S) | Area%  |
|------------|-------------|----------------------|-----------|--------------|--------------|--------|
| 1          | 1.317       | 1.541                | 1.913     | 80.00210     | 1064.74316   |        |
| 2 Z isomer | 3.035       | 3.160                | 3.343     | 12.34278     | 149.71841    | 10.539 |
| 3 E isomer | 3.395       | 3.515                | 3.714     | 178.45915    | 1099.35583   | 77.387 |
| 4          | 4.125       | 4.210                | 4.341     | 7.06685      | 61.78477     |        |
| 5 Diene    | 4.362       | 4.452                | 4.609     | 23.17986     | 171.52794    | 12.074 |
| 6          | 6.036       | 6.120                | 7.339     | 2.85999      | 34.18794     |        |

**Figure S7:** LCMS to assess the conversion and olefin selectivity for Z-selective ethenolysis on macrocyclic peptide **18**. The percentage of the E-isomer, Z-isomer, and resultant diene from ethenolysis was calculated from automatic integrations of each peak area. Column conditions: 20-95% acetonitrile:H<sub>2</sub>O + 0.1% AcOH

**Percentage enrichment of macrocycles 9a-c and 15-18 by Z-selective ethenolysis**

| Compound | Initial E (%) | Final E (%) |
|----------|---------------|-------------|
| 9a       | 96            | 99          |
| 9b       | 80            | 97          |
| 9c       | 82            | 96          |
| 15       | 90            | >99         |
| 16       | 81            | 98          |
| 17       | 90            | 99          |
| 18       | 77            | 88          |

## Solid phase synthesis of peptides

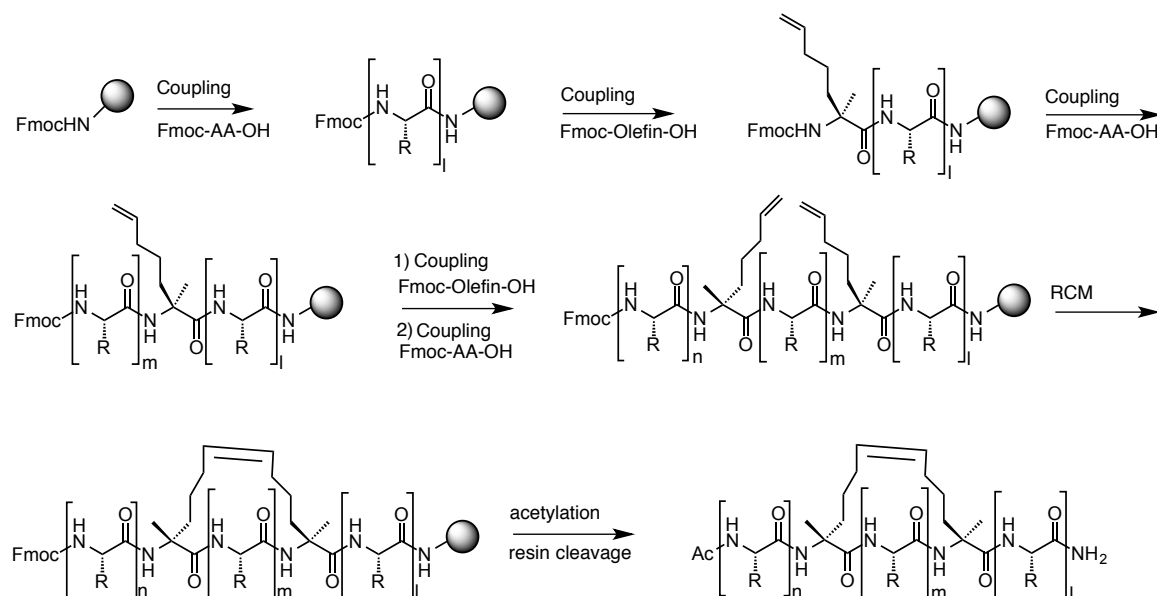

Peptides were synthesized manually or produced on a Titan 357 (AAPPTec, Louisville, KY) automated peptide synthesizer using Rink Amide MBHA resin (NovaBioChem, 0.4 mmol/g resin), at 80  $\mu$ mol scale. The resin was swelled with N-Methyl 2-pyrrolidone (NMP, 10 mL) for 30 min before use. To load the first amino acid onto the resin, the resin-bound Fmoc-protecting group was removed by treatment with 25% (vol/vol) piperidine in NMP (2 x 10 min). Standard amino acids were coupled for 1.5 h using HATU as the activating agent (4 eq. based on loading capacity), Fmoc-protected amino acid (5 eq.), and N,N-diisopropylethylamine (DIEA, 10 eq.) in NMP (2 mL). After each coupling or deprotection reaction, the resin was washed successively with DCM (1 x 1 min), NMP (1 x 1 min), DCM (1 x 1 min) and NMP (1 x 1 min). For the coupling of olefinic amino acids, a reaction time of 8 h was used with Fmoc-(S)-2-(4-pentenyl)alanine (3 eq.) or Fmoc-(R)-2-(7-octenyl)alanine (3 eq.), DIC (3 eq.), HOBT (6 eq.) in NMP (2 mL). After the final amino acid coupling, the resin was washed with DCM (2 x 1 min) and dried *in vacuo* overnight.

For N-terminal acetylation of the peptide, the resin was swelled with NMP (1 mL) for 20 min and then washed with NMP (2 x 1 min). The resin was treated with 25% (vol/vol) piperidine in NMP (2 mL), gently agitated for 20 min, and then drained. The resin was washed with DCM (5 x 2 min) and allowed to dry to afford the amine-terminated peptide. To this was added NMP (1 mL), and the solvent drained. Acetic anhydride (60  $\mu$ L, 0.6 mmol, 30 eq.) in NMP (1.0 mL) was added, followed by N,N-diisopropylethylamine (DIEA, 208  $\mu$ L, 60 eq.) and the resin was agitated for 45 min at rt. The resin was then washed with DCM (1 x 1 min), NMP (1 x 1 min), DCM (1 x 1 min) and dried under a stream of argon for 4 h.

Cleavage of the peptide from the resin and global deprotection were achieved by reacting the resin with 95% TFA, 2.5% triisopropylsilane (TIS), 2.5% H<sub>2</sub>O (vol/vol/vol) for 4 h. The TFA and other volatiles were removed by evaporation under a stream of argon. The peptides were precipitated with cold diethyl ether (4 mL), vortexed, and collected by centrifugation. The pellet was dried under a stream of argon and subsequently dissolved in

a mixture of 50% acetonitrile, 50% H<sub>2</sub>O (vol/vol) and the resin removed by filtration. The cleaved peptides were purified by reverse-phase HPLC using a Zorbax C<sub>8</sub> or C<sub>18</sub> column (Agilent, 5 μm, 9.4 x 250 mm) and characterized by LC/MS TOF using a Zorbax C<sub>8</sub> column (Agilent, 3.5 μm, 2.1 x 150 mm) or matrix-assisted laser desorption ionization time-of-flight (MALDI-TOF)

### **General procedure for RCM on resin-bound olefinic peptides**

The N-terminal modified peptide on resin (50 mg, 0.02 mmol) was dissolved in degassed dichloroethane (DCE, 4.0 mL). To this was added a stock solution of ruthenium catalyst **1-7** in degassed DCE (40 μL of a 0.05 M solution in DCE). The reaction was stirred under a gentle stream of Ar(g) for 2 h, the catalyst was filtered off, and the resin washed first with DCE (5 x 2 min) and then with DMF (2 x 2 min). Exposure of the resin bound peptide to an additional round of catalyst stock solution (40 μL) for 4 h ensured nearly quantitative conversion. Upon completion of RCM, the resin bound peptide was washed with DCE (2 x 2 min), DMF (2 x 2 min), and DCM (2 x 2 min) and dried under vacuum.

Cleavage of the peptide from the resin and global deprotection were achieved by reacting the resin with 95% TFA, 2.5% triisopropylsilane, 2.5% H<sub>2</sub>O (vol/vol/vol) for 2 h. The TFA and other volatiles were removed by evaporation under a stream of argon. The peptides were precipitated with cold diethyl ether (4 mL), vortexed, and collected by centrifugation. The pellet was dried under a gentle stream of argon and subsequently dissolved in a mixture of 50% acetonitrile, 50% H<sub>2</sub>O (vol/vol) and the resin was removed by filtration. The cleaved peptides were purified by reverse-phase HPLC using a Zorbax C<sub>8</sub> or C<sub>18</sub> column (Agilent, 5 μm, 9.4 x 250 mm) and characterized by LC/MS TOF using a Zorbax C<sub>8</sub> column (Agilent, 3.5 μm, 2.1 x 150 mm) or matrix-assisted laser desorption ionization time-of-flight (MALDI-TOF).

### **Monitoring the conversion of RCM on resin-bound olefinic peptides**

The percentage conversion of RCM on Fmoc-protected peptides was achieved by taking aliquots of the resin suspension (25 μL) from the reaction mixture at variable time points, quenching with ethyl vinyl ether (50 μL), filtering, and washing with DCE (300 μL). The resin was dried under a stream of argon and suspended in 500 μL of the cleavage cocktail TFA/TIS/H<sub>2</sub>O (95:2.5:2.5) and allowed to stir at room temperature for 1 h. The TFA and other volatiles were removed by evaporation and the crude residue dissolved in diethyl ether (200 μL), vortexed, and centrifuged. The ether was carefully decanted and the pellet was dried under a stream of argon. The pellet was dissolved in 100 μL of 50% (vol/vol) aqueous acetonitrile and filtered to afford the crude peptide. For LC/MS TOF analysis, 5 μL of dissolved peptide was injected onto an analytical column (Eclipse Plus C<sub>8</sub> column (1.8 μm, 2.1 x 50 mm)) operating in positive electrospray ionization (ESI) mode.





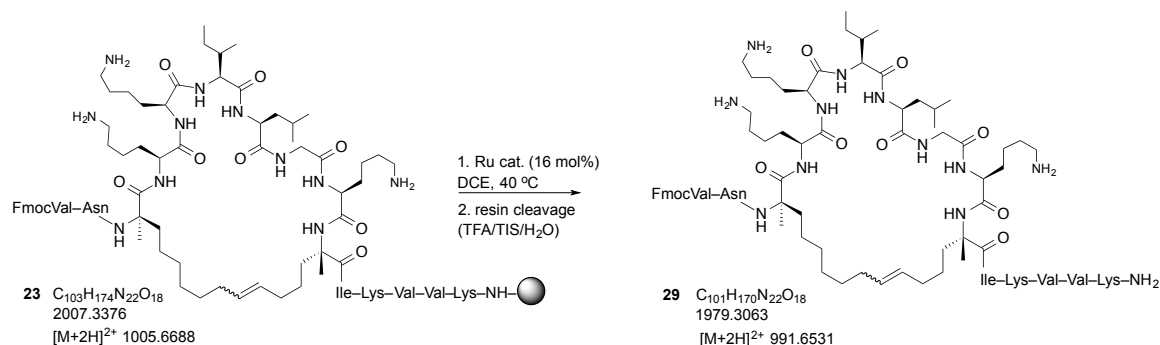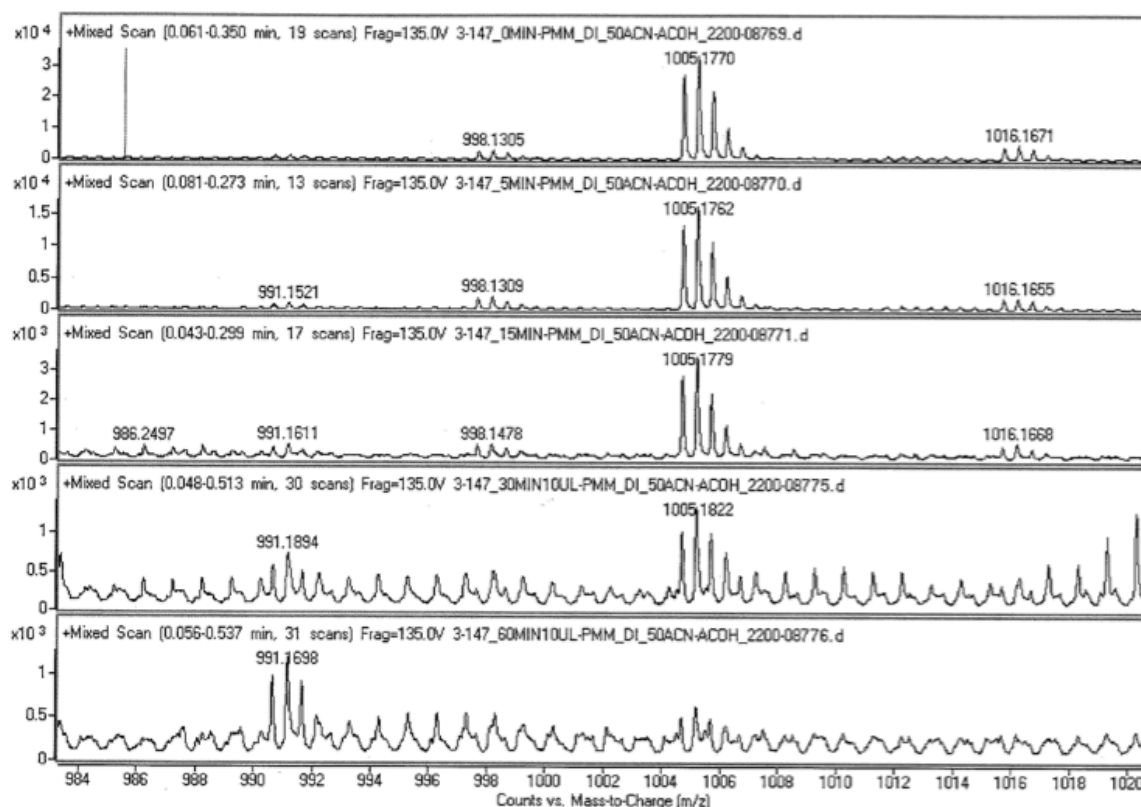

**Figure S10:** Evaluation of RCM on peptide **23** as a function of time ( $t = 0$  to 60 min). The indicated mass corresponding to starting material **23** (1005.1770) and product **29** (991.1698) is observed as the  $[M+2H]^{2+}$  ion as measured by LC/MS TOF





## General procedure for Z-selective ethenolysis on resin-bound peptides

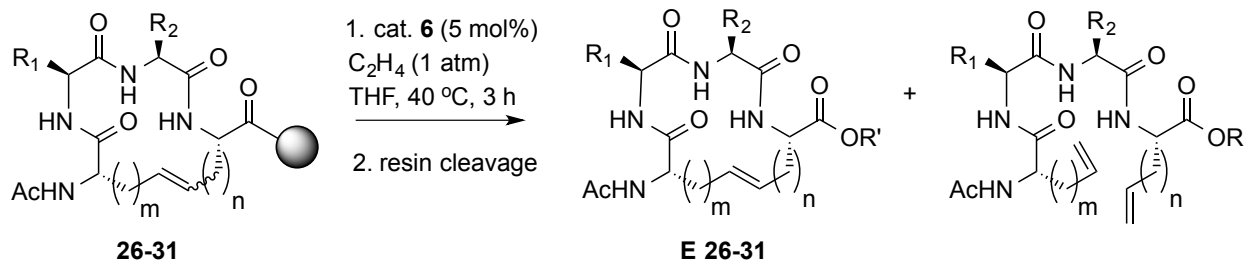

The procedure for ethenolysis on resin-bound peptides **26-31** was conducted in a manner similar to conditions for Z-selective ethenolysis on peptides **8a-c** and **15-19** with minor modification. Briefly, 50 mg of resin bearing the N-terminal acetylated peptide was added to a 4 mL vial equipped with a septum. THF (1 mL) was added, followed by catalyst **6** (20  $\mu$ L of a 0.05 M stock solution in THF) and the reaction flask evacuated with ethylene (3x) and stirred at an ethylene pressure at 40 °C for 3 h. At this point, the solvent was filtered and the resin washed with THF (2 x 1 mL). To the resin was added a solution of TFA/H<sub>2</sub>O/triisopropylsilane (95:2.5:2.5 v/v/v, 500  $\mu$ L) and the resin agitated for 1 h. The TFA and other volatiles were removed via a stream of argon, and the crude peptide and resin were suspended in aqueous acetonitrile (50:50 v/v, 100  $\mu$ L), and the resin was filtered off. For LC/MS analysis, 10  $\mu$ L of the filtrate was diluted with 1:1 (v/v) aqueous acetonitrile (500  $\mu$ L).

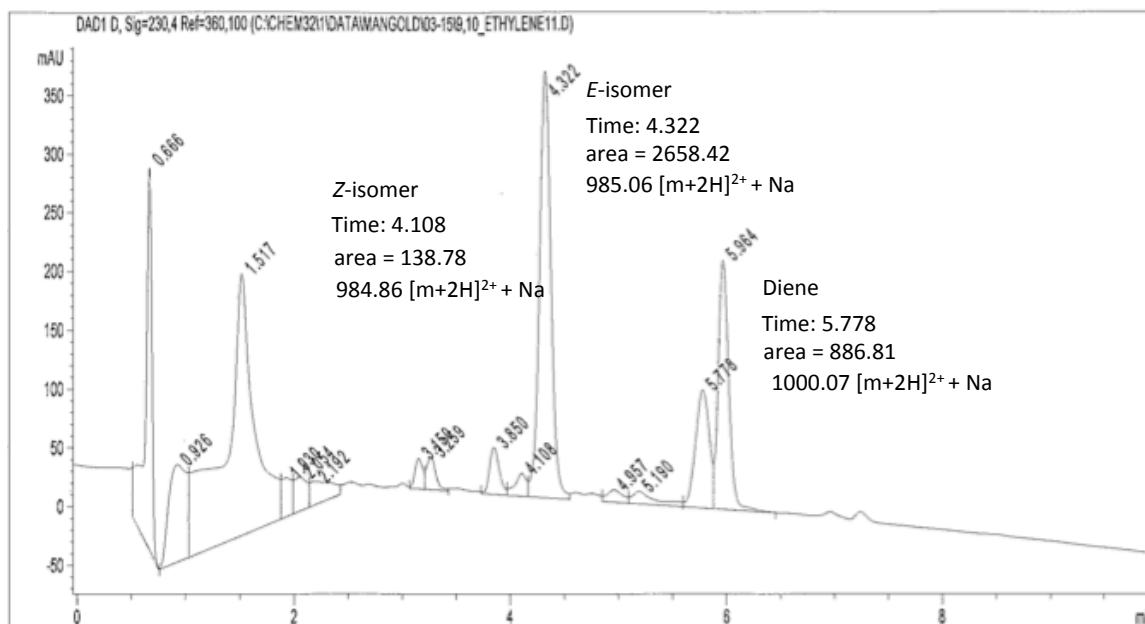

| Peak        | Start (min) | R <sub>t</sub> (min) | End (min) | Height (mAu) | Area (mAu*S) | Area%  |
|-------------|-------------|----------------------|-----------|--------------|--------------|--------|
| 1           | 0.509       | 0.666                | 0.756     | 328.06650    | 1390.04016   |        |
| 2           | 0.756       | 0.926                | 1.028     | 82.98902     | 943.99445    |        |
| 3           | 1.028       | 1.517                | 1.882     | 222.95676    | 4288.41797   |        |
| 4           | 1.882       | 1.930                | 1.990     | 33.20190     | 207.45451    |        |
| 5           | 1.990       | 2.054                | 2.139     | 29.15939     | 238.06068    |        |
| 6           | 2.139       | 2.192                | 2.428     | 20.00443     | 266.20630    |        |
| 7           | 3.062       | 3.150                | 3.202     | 26.24897     | 127.78748    |        |
| 8           | 3.202       | 3.259                | 3.422     | 28.63281     | 169.41917    |        |
| 9           | 3.726       | 3.850                | 3.974     | 40.15965     | 257.21872    |        |
| 10 Z isomer | 3.974       | 4.108                | 4.167     | 18.44371     | 138.78113    | 3.767  |
| 11 E isomer | 4.167       | 4.322                | 4.549     | 363.16830    | 2658.42139   | 72.161 |
| 12          | 4.851       | 4.957                | 5.092     | 10.55256     | 107.82548    |        |
| 13          | 5.092       | 5.190                | 5.596     | 10.96348     | 165.98024    |        |
| 14 Diene    | 5.596       | 5.778                | 5.874     | 100.87401    | 886.81006    | 24.072 |
| 15          | 5.874       | 5.964                | 6.449     | 212.34502    | 1452.62390   |        |

**Figure S12:** LCMS to assess the conversion and olefin selectivity for Z-selective ethenolysis on macrocyclic peptide **26**. The percentage of the E-isomer, Z-isomer, and resultant diene from ethenolysis was calculated from automatic integrations of each peak area. Column conditions: 5-95% acetonitrile:H<sub>2</sub>O + 0.1% AcOH

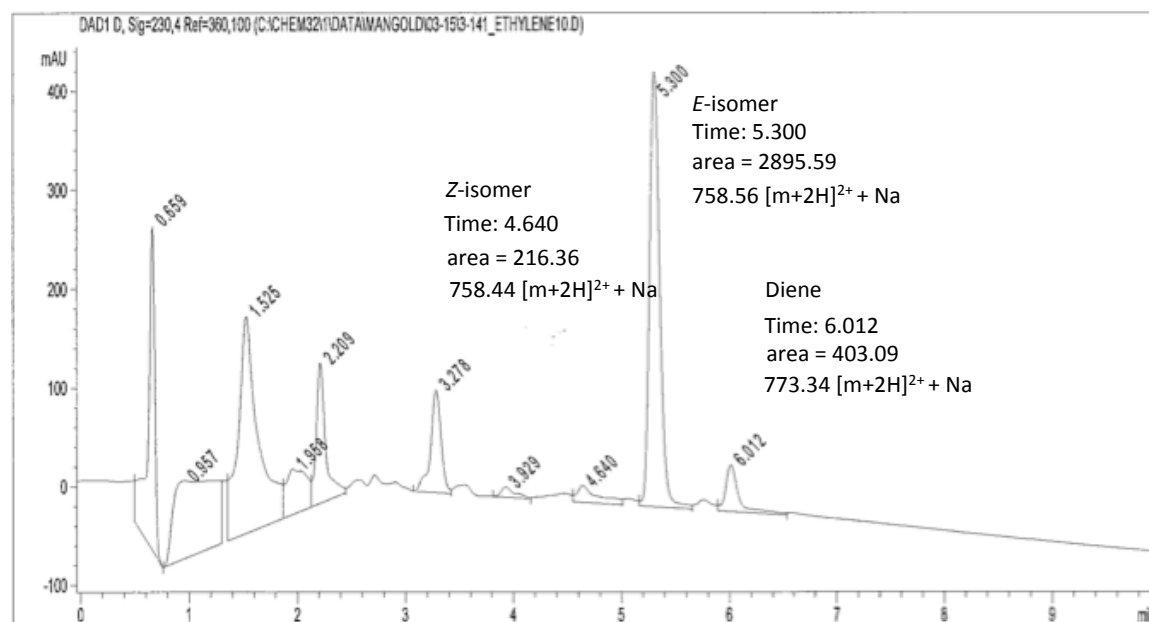

| Peak       | Start (min) | R <sub>t</sub> (min) | End (min) | Height (mAu) | Area (mAu*S) | Area%  |
|------------|-------------|----------------------|-----------|--------------|--------------|--------|
| 1          | 0.495       | 0.659                | 0.760     | 329.17676    | 1456.77148   |        |
| 2          | 0.760       | 0.957                | 1.320     | 78.93261     | 2048.06274   |        |
| 3          | 1.355       | 1.525                | 1.867     | 220.29582    | 2850.60815   |        |
| 4          | 1.867       | 1.958                | 2.123     | 46.43423     | 591.10437    |        |
| 5          | 2.123       | 2.209                | 2.446     | 141.96553    | 865.81653    |        |
| 6          | 3.074       | 3.279                | 3.418     | 104.29708    | 708.66333    |        |
| 7          | 3.808       | 3.929                | 4.159     | 10.90910     | 95.11992     |        |
| 8 Z isomer | 4.549       | 4.640                | 5.006     | 17.12723     | 216.36253    | 6.155  |
| 9 E isomer | 5.163       | 5.300                | 5.655     | 440.54013    | 2895.59058   | 82.377 |
| 10 Diene   | 5.891       | 6.012                | 6.535     | 47.50585     | 403.09421    | 11.467 |

**Figure S13:** LCMS to assess the conversion and olefin selectivity for Z-selective ethenolysis on macrocyclic peptide **27**. The percentage of the E-isomer, Z-isomer, and resultant diene from ethenolysis was calculated from automatic integrations of each peak area. Column conditions: 5-95% acetonitrile:H<sub>2</sub>O + 0.1% AcOH

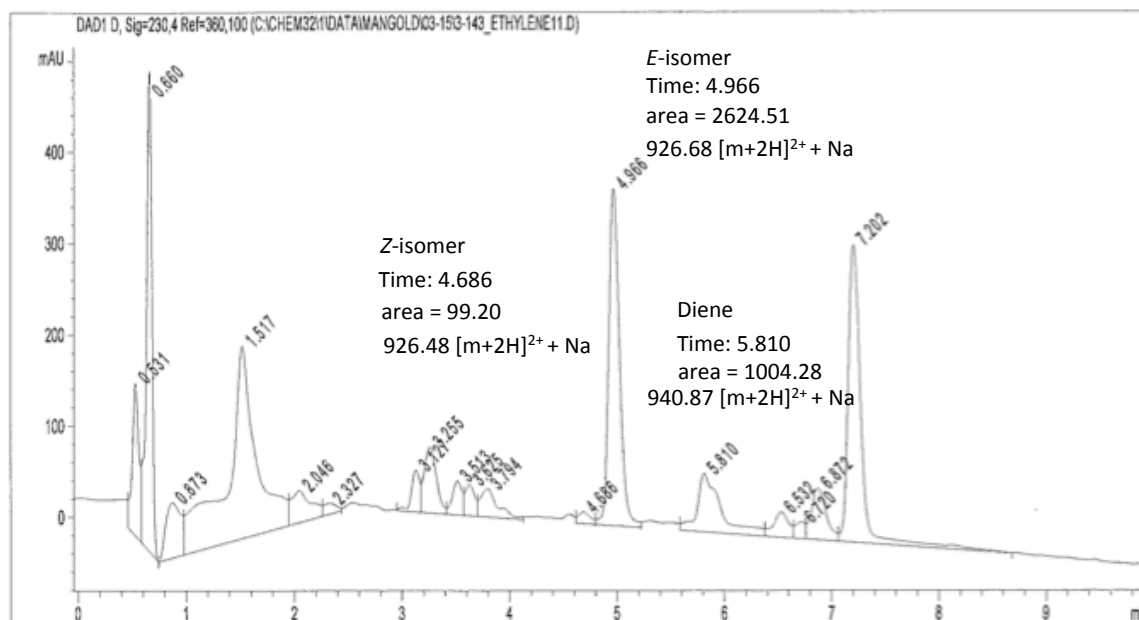

| Peak        | Start (min) | R <sub>t</sub> (min) | End (min) | Height (mAu) | Area (mAu*S) | Area%  |
|-------------|-------------|----------------------|-----------|--------------|--------------|--------|
| 1           | 0.462       | 0.531                | 0.584     | 167.92915    | 705.33002    |        |
| 2           | 0.584       | 0.660                | 0.745     | 528.87872    | 1868.56311   |        |
| 3           | 0.745       | 0.873                | 0.974     | 60.94785     | 577.99658    |        |
| 4           | 0.974       | 1.517                | 1.945     | 211.31032    | 4026.08667   |        |
| 5           | 1.945       | 2.046                | 2.258     | 35.25732     | 447.11069    |        |
| 6           | 2.258       | 2.327                | 2.438     | 12.11003     | 99.69940     |        |
| 7           | 2.949       | 3.127                | 3.173     | 46.12304     | 244.60857    |        |
| 8           | 3.173       | 3.255                | 3.408     | 72.28084     | 573.46991    |        |
| 9           | 3.408       | 3.513                | 3.572     | 37.38420     | 235.83276    |        |
| 10          | 3.572       | 3.625                | 3.701     | 34.31423     | 209.67151    |        |
| 11          | 3.701       | 3.794                | 4.122     | 31.37045     | 350.17886    |        |
| 12 Z isomer | 4.614       | 4.686                | 4.798     | 12.77934     | 99.20309     | 2.661  |
| 13 E isomer | 4.798       | 4.966                | 5.226     | 369.50021    | 2624.51563   | 70.400 |
| 14 Diene    | 5.583       | 5.810                | 6.376     | 64.16768     | 1004.27820   | 26.939 |
| 15          | 6.376       | 6.532                | 6.642     | 27.74984     | 274.77026    |        |
| 16          | 6.642       | 6.720                | 6.761     | 18.47508     | 117.75485    |        |
| 17          | 6.761       | 6.872                | 7.061     | 57.09723     | 544.13873    |        |
| 18          | 7.061       | 7.202                | 8.682     | 326.45541    | 2733.85864   |        |

**Figure S14:** LCMS to assess the conversion and olefin selectivity for Z-selective ethenolysis on macrocyclic peptide **28**. The percentage of the E-isomer, Z-isomer, and resultant diene from ethenolysis was calculated from automatic integrations of each peak area. Column conditions: 5-95% acetonitrile:H<sub>2</sub>O + 0.1% AcOH

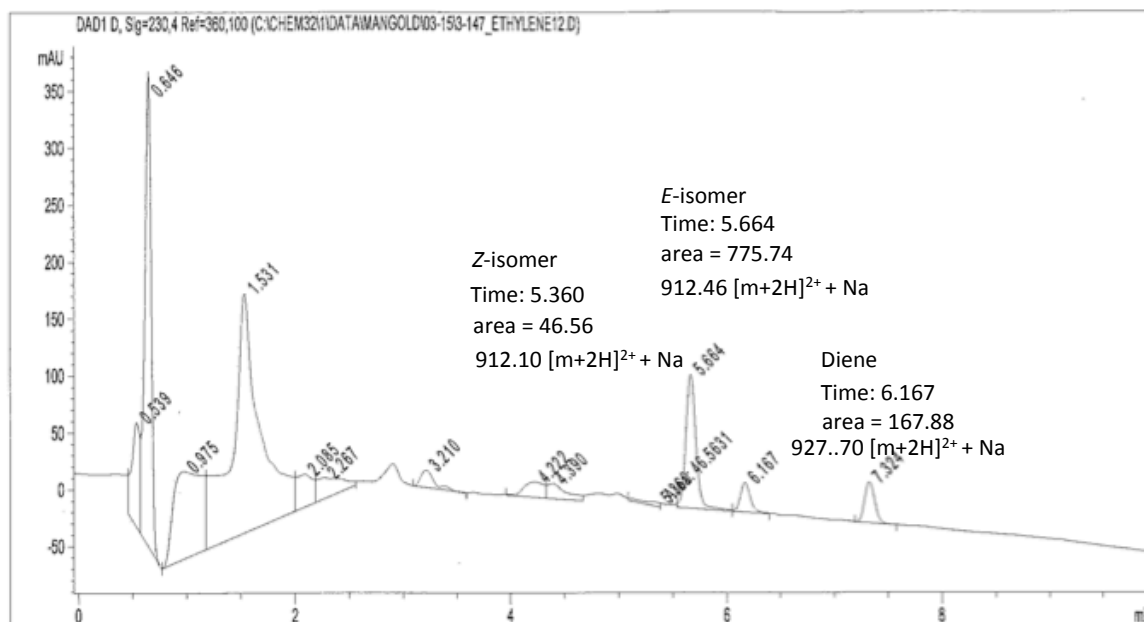

| Peak        | Start (min) | R <sub>t</sub> (min) | End (min) | Height (mAu) | Area (mAu*S) | Area%  |
|-------------|-------------|----------------------|-----------|--------------|--------------|--------|
| 1           | 0.460       | 0.539                | 0.570     | 92.57001     | 450.46036    |        |
| 2           | 0.570       | 0.646                | 0.768     | 417.97043    | 1720.84460   |        |
| 3           | 0.765       | 0.975                | 1.176     | 77.11630     | 1406.33704   |        |
| 4           | 1.176       | 1.531                | 1.998     | 210.80536    | 3862.95581   |        |
| 5           | 1.998       | 2.085                | 2.186     | 29.16211     | 300.56073    |        |
| 6           | 2.186       | 2.267                | 2.557     | 18.48628     | 283.28735    |        |
| 7           | 3.092       | 3.210                | 3.586     | 15.28884     | 131.22969    |        |
| 8           | 3.960       | 4.222                | 4.328     | 13.59650     | 172.75735    |        |
| 9           | 4.328       | 4.390                | 4.668     | 13.28523     | 165.70427    |        |
| 10 Z isomer | 5.088       | 5.360                | 5.386     | 3.56803      | 46.56314     | 4.702  |
| 11 E isomer | 5.533       | 5.664                | 6.049     | 117.7833     | 775.74634    | 78.343 |
| 12 Diene    | 6.049       | 6.167                | 6.393     | 26.00421     | 167.88136    | 16.954 |
| 13          | 7.190       | 7.324                | 7.573     | 35.94275     | 235.39198    |        |

**Figure S15:** LCMS to assess the conversion and olefin selectivity for Z-selective ethenolysis on macrocyclic peptide **29**. The percentage of the E-isomer, Z-isomer, and resultant diene from ethenolysis was calculated from automatic integrations of each peak area. Column conditions: 5-95% acetonitrile:H<sub>2</sub>O + 0.1% AcOH

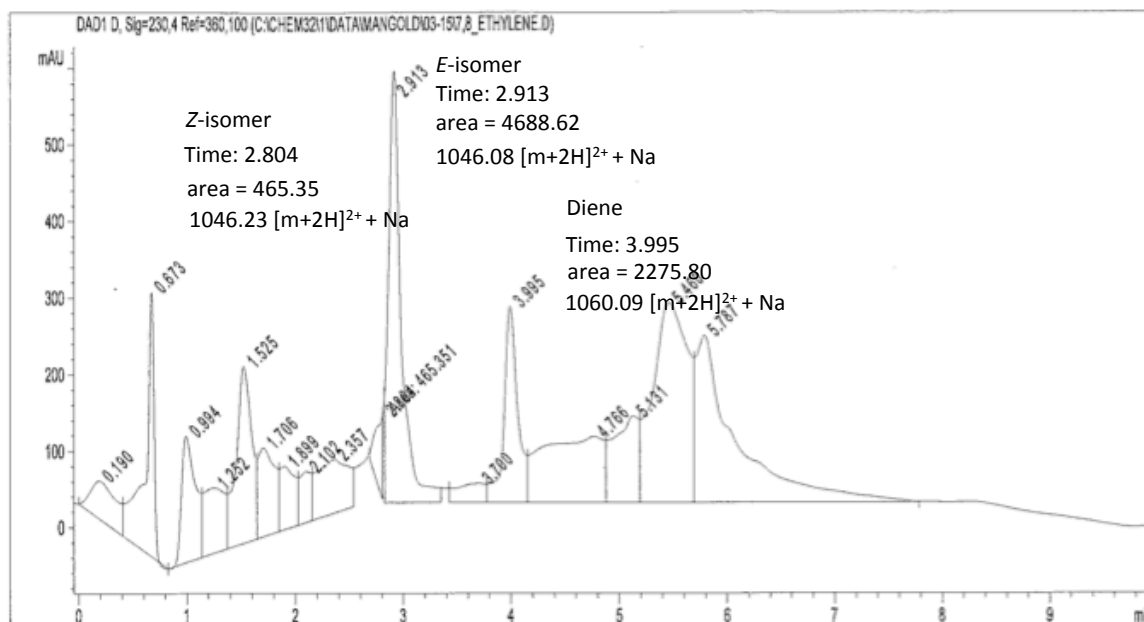

| Peak        | Start (min) | R <sub>t</sub> (min) | End (min) | Height (mAu) | Area (mAu*S) | Area%  |
|-------------|-------------|----------------------|-----------|--------------|--------------|--------|
| 1           | 0.000       | 0.190                | 0.411     | 49.50397     | 866.64758    |        |
| 2           | 0.411       | 0.673                | 0.829     | 345.84637    | 1980.53406   |        |
| 3           | 0.829       | 0.994                | 1.137     | 165.26991    | 1479.47595   |        |
| 4           | 1.137       | 1.252                | 1.372     | 85.72522     | 1158.23145   |        |
| 5           | 1.372       | 1.525                | 1.646     | 231.50479    | 2337.08350   |        |
| 6           | 1.646       | 1.706                | 1.850     | 116.38415    | 1236.74084   |        |
| 7           | 1.850       | 1.899                | 2.023     | 83.05311     | 778.40820    |        |
| 8           | 2.023       | 2.102                | 2.152     | 66.59915     | 498.29349    |        |
| 9           | 2.152       | 2.357                | 2.534     | 70.39770     | 1441.54053   |        |
| 10 Z isomer | 2.681       | 2.804                | 2.810     | 109.36814    | 465.35052    | 6.263  |
| 11 E isomer | 2.824       | 2.913                | 3.350     | 565.48346    | 4688.62109   | 63.105 |
| 12          | 3.424       | 3.700                | 3.776     | 25.38783     | 476.28745    |        |
| 13 Diene    | 3.776       | 3.995                | 4.155     | 256.55038    | 2275.80347   | 30.631 |
| 14          | 4.155       | 4.766                | 4.878     | 86.66356     | 3346.67285   |        |
| 15          | 4.878       | 5.131                | 5.194     | 113.33173    | 1830.36438   |        |
| 16          | 5.194       | 5.460                | 5.689     | 261.37427    | 5829.7660    |        |
| 17          | 5.689       | 5.787                | 7.784     | 218.59744    | 5794.22803   |        |

**Figure S16:** LCMS to assess the conversion and olefin selectivity for Z-selective ethenolysis on macrocyclic peptide **30**. The percentage of the E-isomer, Z-isomer, and resultant diene from ethenolysis was calculated from automatic integrations of each peak area. Column conditions: 5-95% acetonitrile:H<sub>2</sub>O + 0.1% AcOH

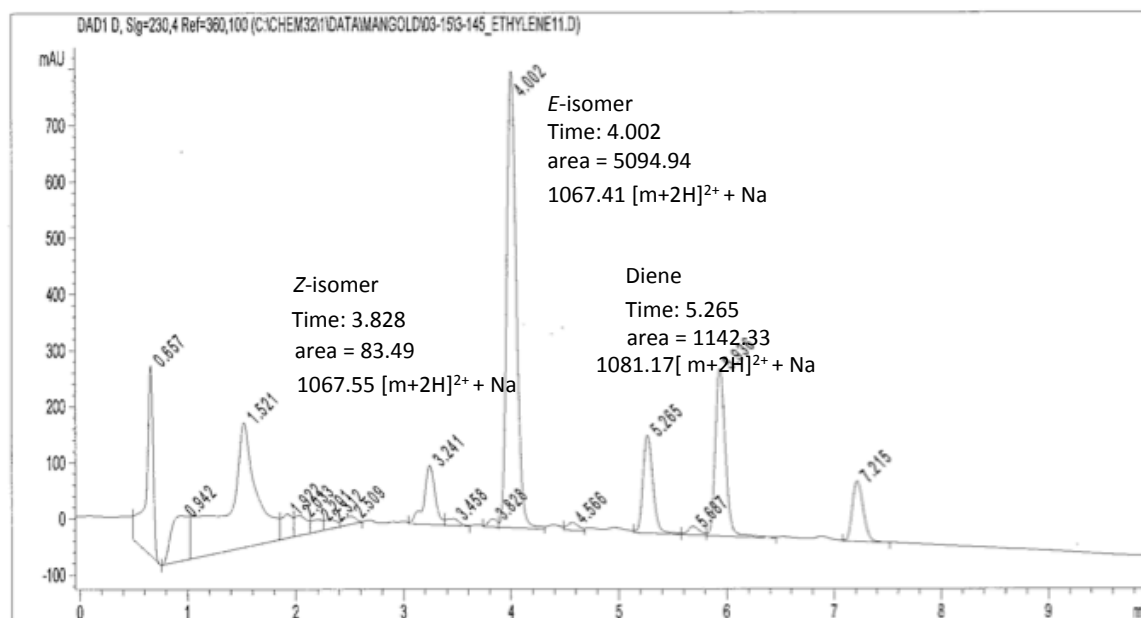

| Peak        | Start (min) | R <sub>t</sub> (min) | End (min) | Height (mAu) | Area (mAu*S) | Area%  |
|-------------|-------------|----------------------|-----------|--------------|--------------|--------|
| 1           | 0.491       | 0.657                | 0.754     | 338.71182    | 1543.24329   |        |
| 2           | 0.754       | 0.942                | 1.020     | 80.09177     | 905.25452    |        |
| 3           | 1.020       | 1.521                | 1.849     | 222.35681    | 4322.25391   |        |
| 4           | 1.849       | 1.922                | 1.979     | 43.20468     | 306.77618    |        |
| 5           | 1.979       | 2.033                | 2.131     | 35.63584     | 281.65182    |        |
| 6           | 2.131       | 2.201                | 2.260     | 21.46295     | 159.15390    |        |
| 7           | 2.260       | 2.312                | 2.405     | 16.39495     | 124.08040    |        |
| 8           | 2.405       | 2.509                | 2.612     | 14.84283     | 120.20170    |        |
| 9           | 3.045       | 3.241                | 3.380     | 105.79904    | 768.17249    |        |
| 10          | 3.380       | 3.458                | 3.609     | 11.90909     | 98.96686     |        |
| 11 Z isomer | 3.737       | 3.828                | 3.882     | 14.97733     | 83.49461     | 1.321  |
| 12 E isomer | 3.882       | 4.002                | 4.307     | 813.08643    | 5094.94629   | 80.606 |
| 13          | 4.484       | 4.566                | 4.677     | 14.04178     | 103.66424    |        |
| 14 Diene    | 5.136       | 5.265                | 5.577     | 175.19185    | 1142.33435   | 18.073 |
| 15          | 5.577       | 5.687                | 5.810     | 15.50419     | 115.46684    |        |
| 16          | 5.810       | 5.936                | 6.458     | 298.65598    | 1950.84619   |        |
| 17          | 7.077       | 7.215                | 7.518     | 107.71246    | 763.00409    |        |

**Figure S17:** LCMS to assess the conversion and olefin selectivity for Z-selective ethenolysis on macrocyclic peptide **31**. The percentage of the E-isomer, Z-isomer, and resultant diene from ethenolysis was calculated from automatic integrations of each peak area. Column conditions: 5-95% acetonitrile:H<sub>2</sub>O + 0.1% AcOH



## Percentage enrichment of macrocycles 26-31 by Z-selective ethenolysis

| Compound | Initial E:Z (%) | Final E:Z (%) |
|----------|-----------------|---------------|
| 26       | 72:28           | 95:5          |
| 27       | 83:17           | 93:7          |
| 28       | 71:29           | 96:4          |
| 29       | 79:21           | 94:6          |
| 30       | 64:36           | 98:2          |
| 31       | 81:19           | 98:2          |

## MALDI-TOF spectra of macrocycles 26-31

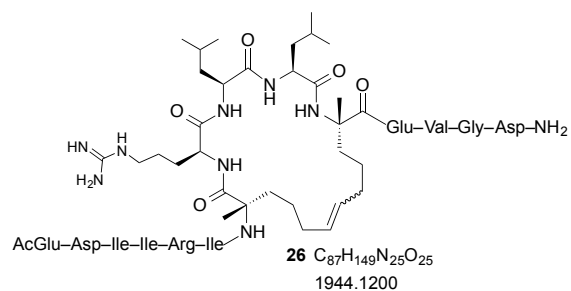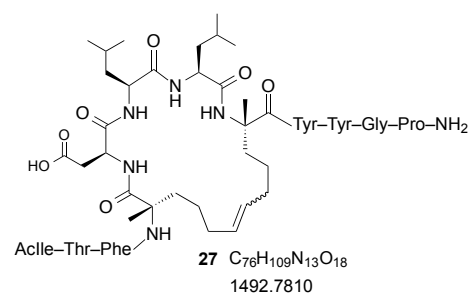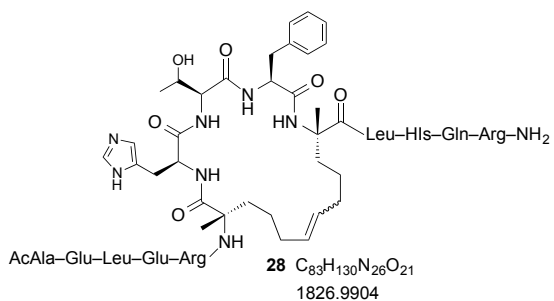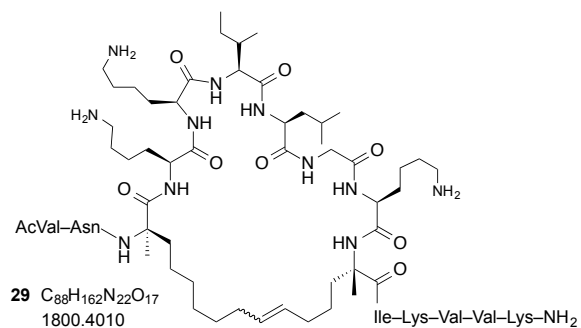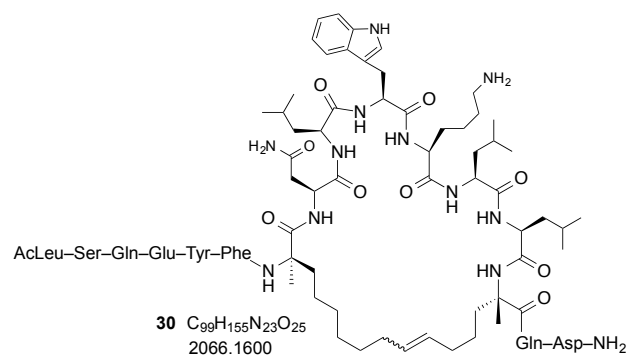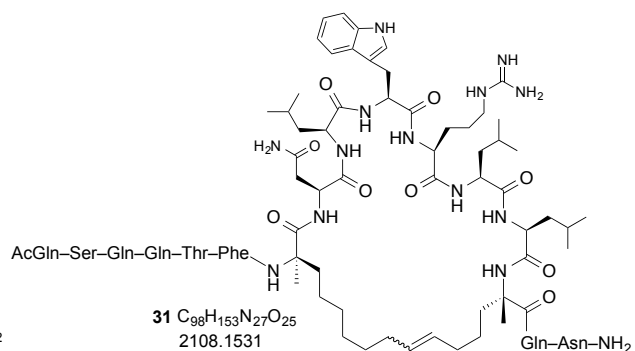

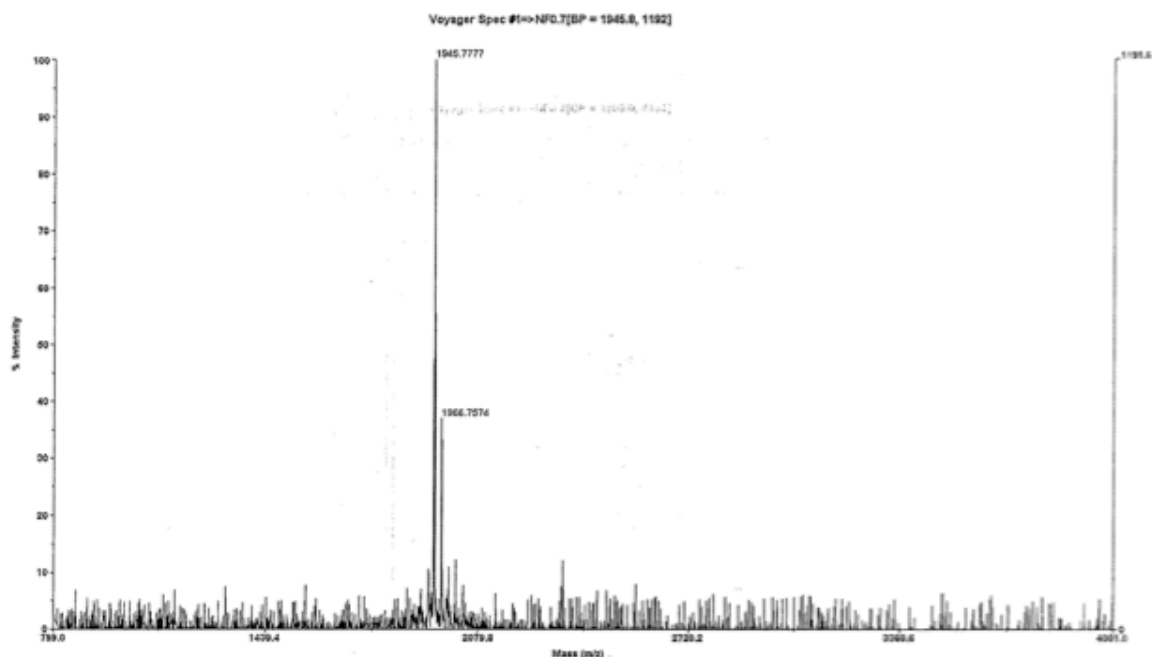

**Figure S18:** MALDI-TOF of purified peptide **26**. Indicated masses correspond to 1945.7777  $[M+H]^+$  and 1966.7574  $[M+Na]^+$  for the product of RCM.

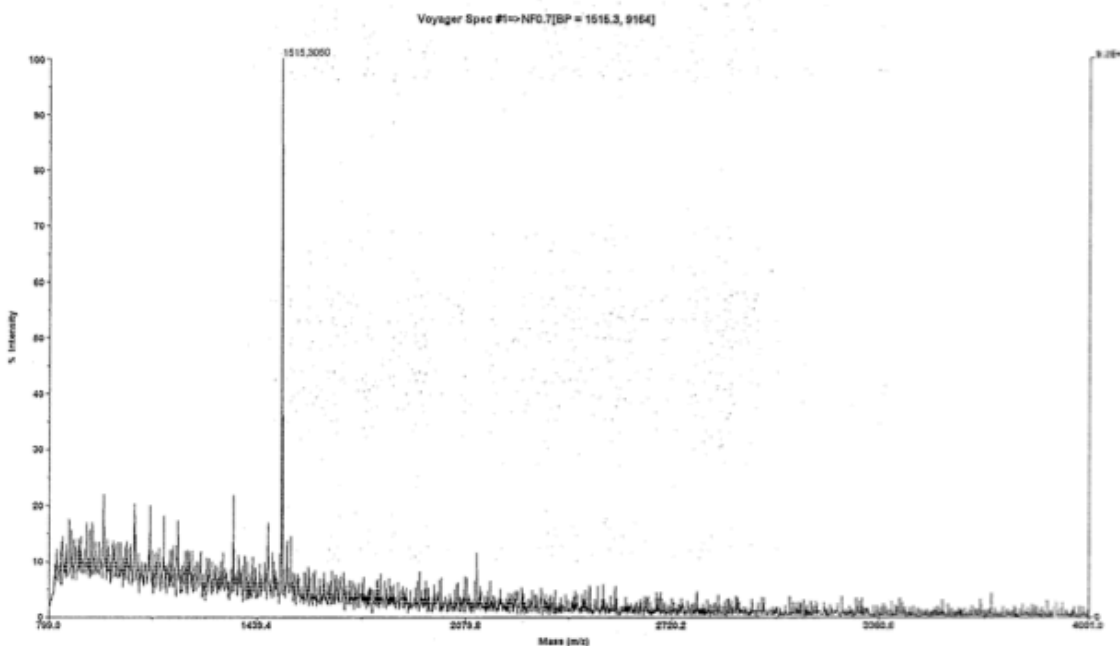

**Figure S19:** MALDI-TOF of purified peptide **27**. Indicated mass corresponds to 1515.3050  $[M+Na]^+$  for the product of RCM.

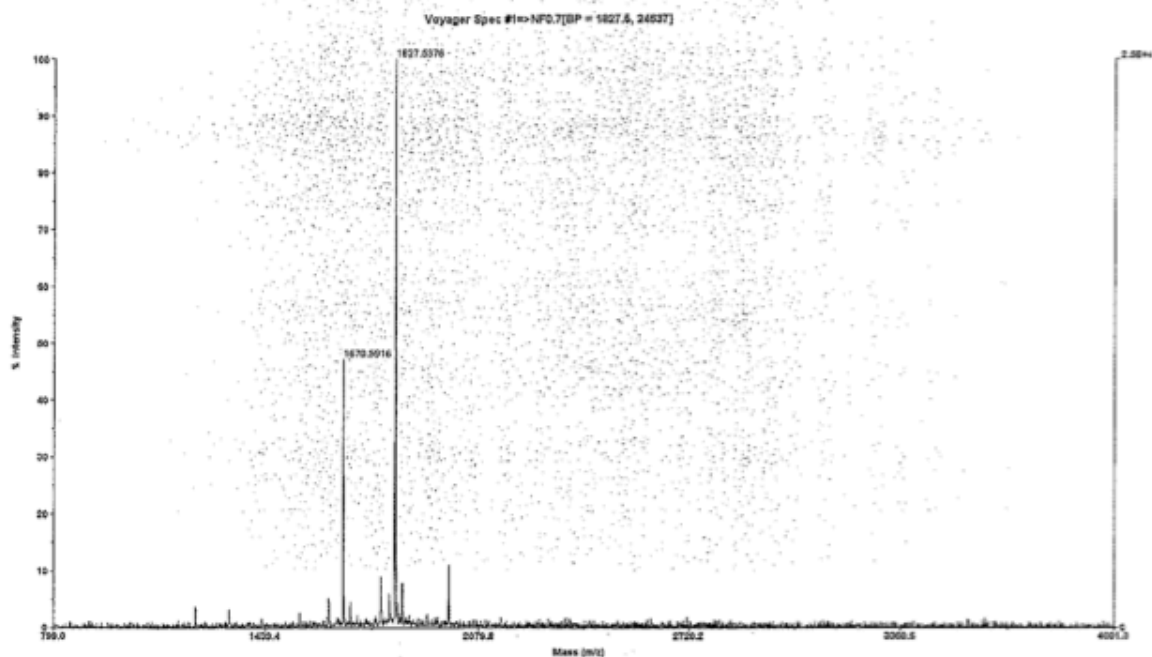

**Figure S20:** MALDI-TOF of purified peptide **28**. Indicated masses correspond to product 1827.5376  $[M+H]^+$  and unknown mass 1670.5916 for the product of RCM.

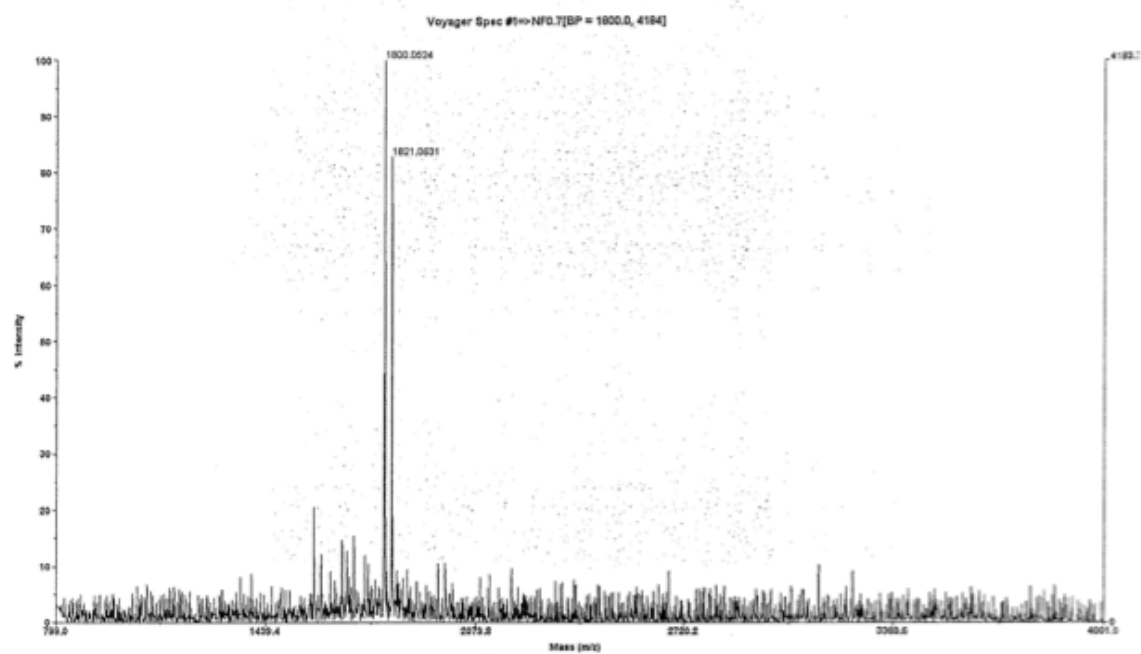

**Figure S21:** MALDI-TOF of purified peptide **29**. Indicated masses correspond to 1800.0524  $[M+H]^+$  and 1821.0631  $[M+Na]^+$  for the product of RCM.

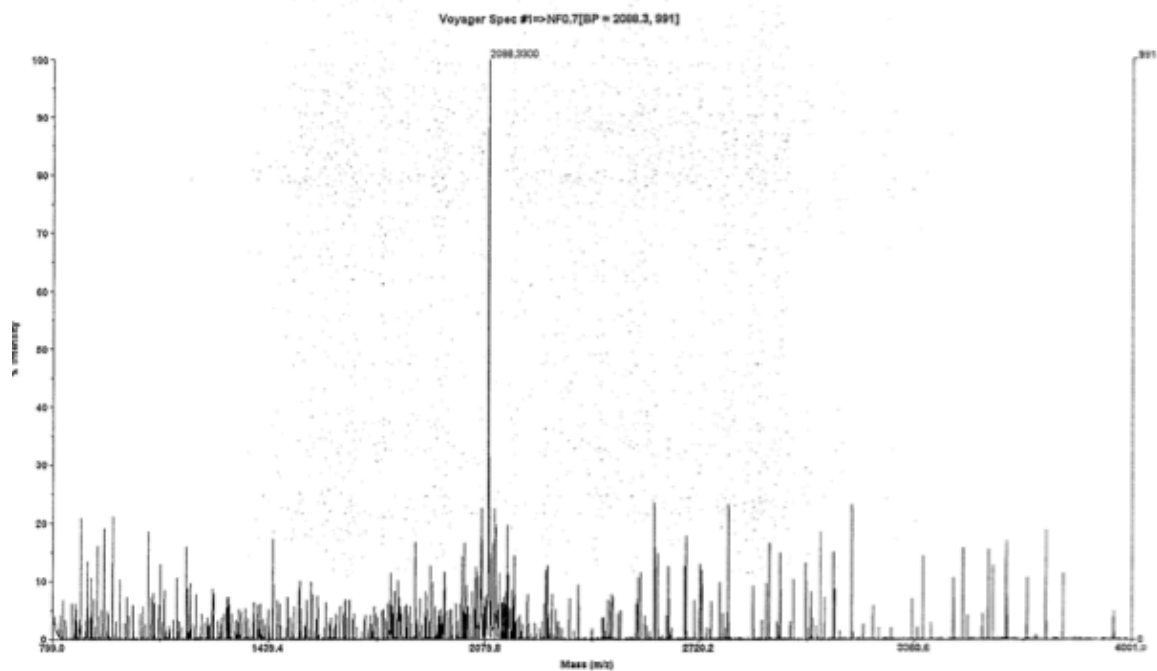

**Figure S22:** MALDI-TOF of purified peptide **30**. Indicated mass corresponds to 2088.3300  $[M+Na]^+$  for the product of RCM.

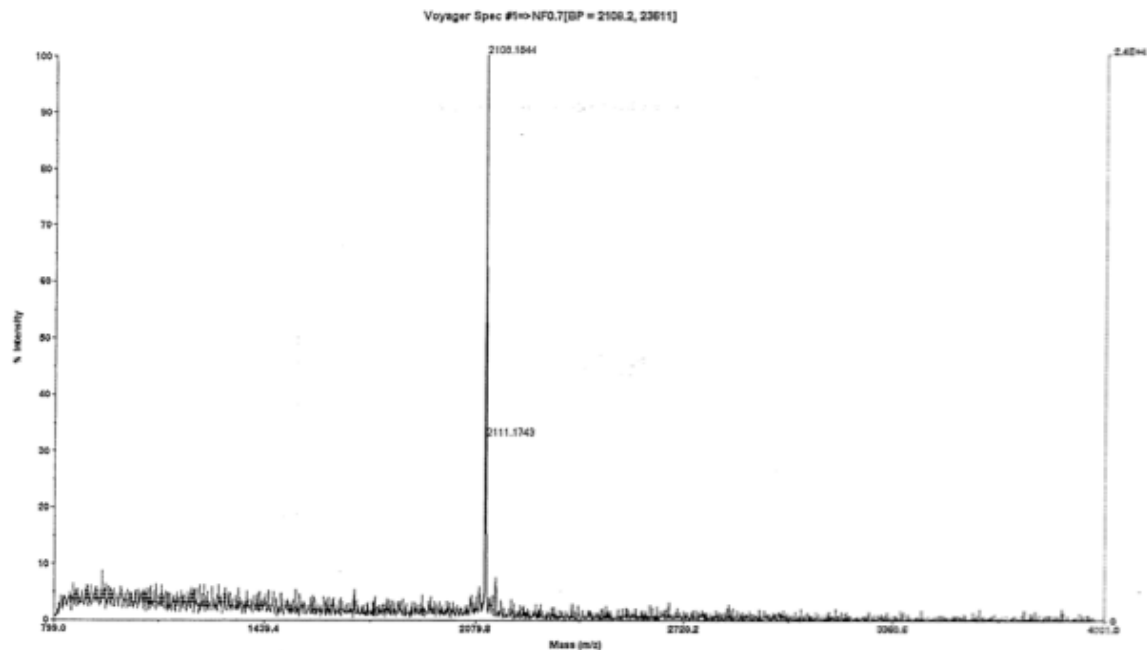

**Figure S23:** MALDI-TOF of purified peptide **31**. Indicated mass corresponds to 2108.1844  $[M+H]^+$  for the product of RCM.

## HPLC traces of macrocycles 27 and 29

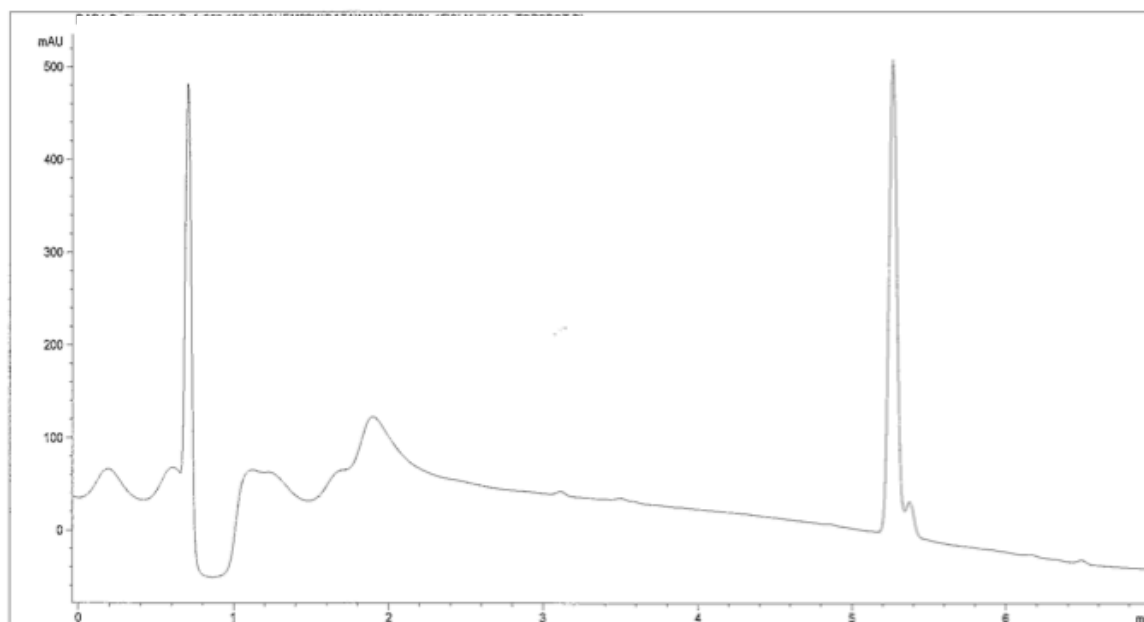

**Figure S24:** Analytical HPLC of peptide Z-27 (Rt 5.221 min). Column conditions: 5 to 85% acetonitrile:H<sub>2</sub>O + 0.1% TFA

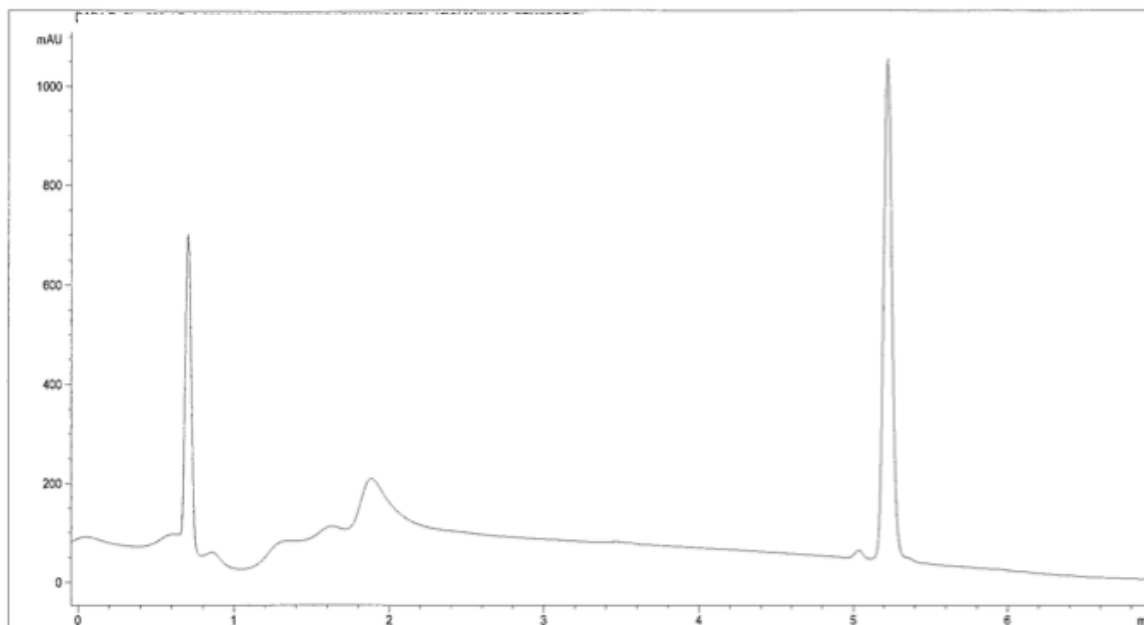

**Figure S25:** Analytical HPLC of peptide E-27 (Rt 5.280 min). Column conditions: 5 to 85% acetonitrile:H<sub>2</sub>O + 0.1% TFA

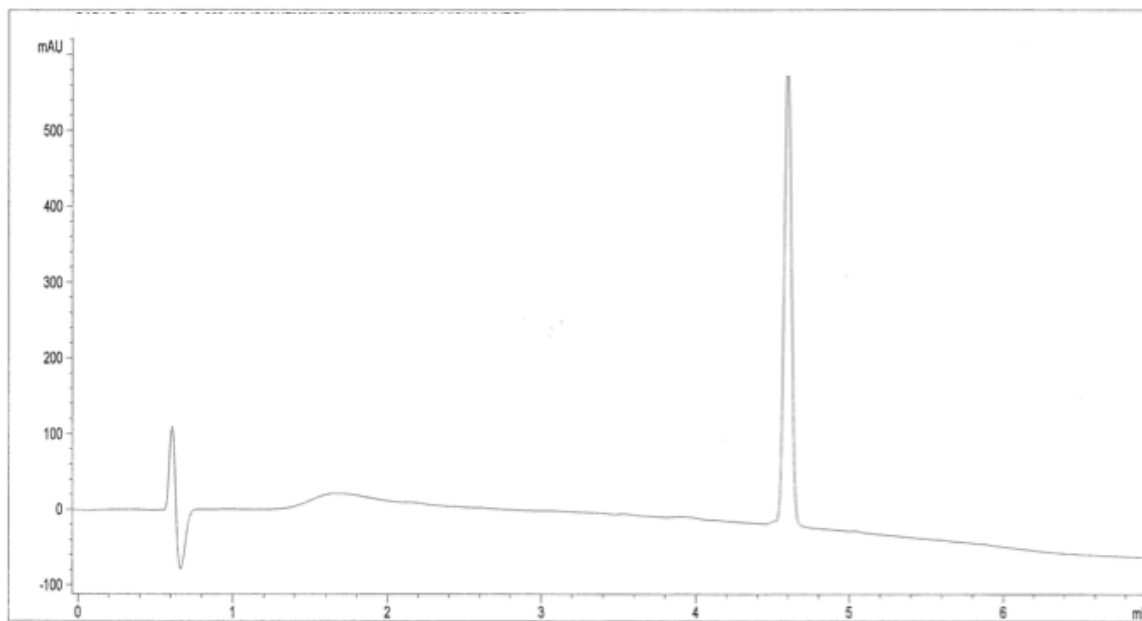

**Figure S26:** Analytical HPLC of peptide Z-29 (Rt 4.630 min). Column conditions: 15 to 80% acetonitrile:H<sub>2</sub>O + 0.1% TFA

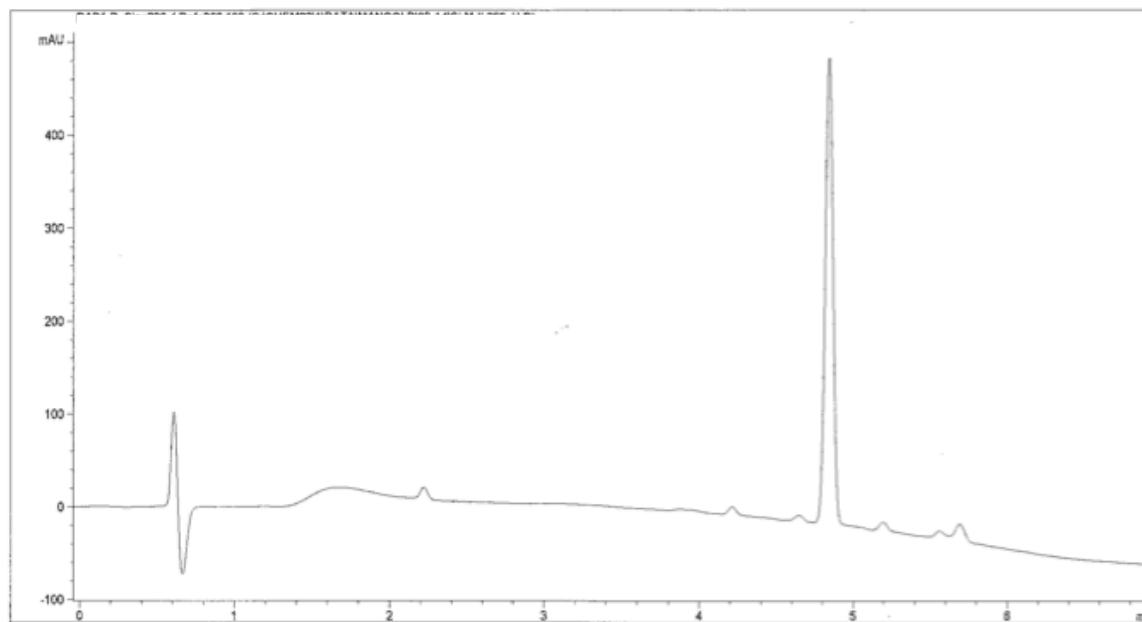

**Figure S27:** Analytical HPLC of peptide E-29 (Rt 4.843 min). Column conditions: 15 to 80% acetonitrile:H<sub>2</sub>O + 0.1% TFA

## Circular Dichroism of $\alpha$ -helical peptides

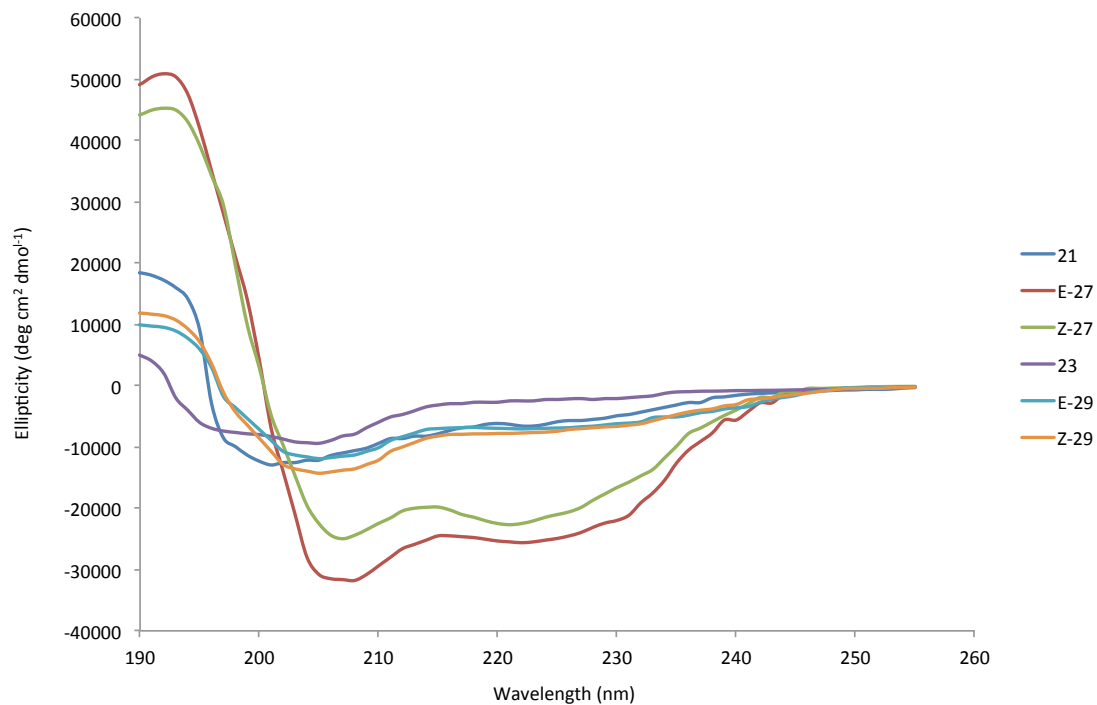

**Figure S28:** Circular dichroism of peptides before (**21** and **23**) and after (**27** and **29**) RCM. Both *E* and *Z* olefin isomers of macrocycles **27** and **29** were examined for their  $\alpha$ -helicity. Parameters: 190 to 255 nm; 1 nm step resolution, averaging time 1 sec, 20 °C.

| Compound | $\alpha$ -helicity |
|----------|--------------------|
| 21       | 20.8               |
| E-27     | 80.9               |
| Z-27     | 71.0               |
| 23       | 7.5                |
| E-29     | 21.2               |
| Z-29     | 23.1               |

**NMR Spectra:**  $^1\text{H}$  NMR (500 MHz,  $\text{CDCl}_3$ ) spectrum of compound **S1**

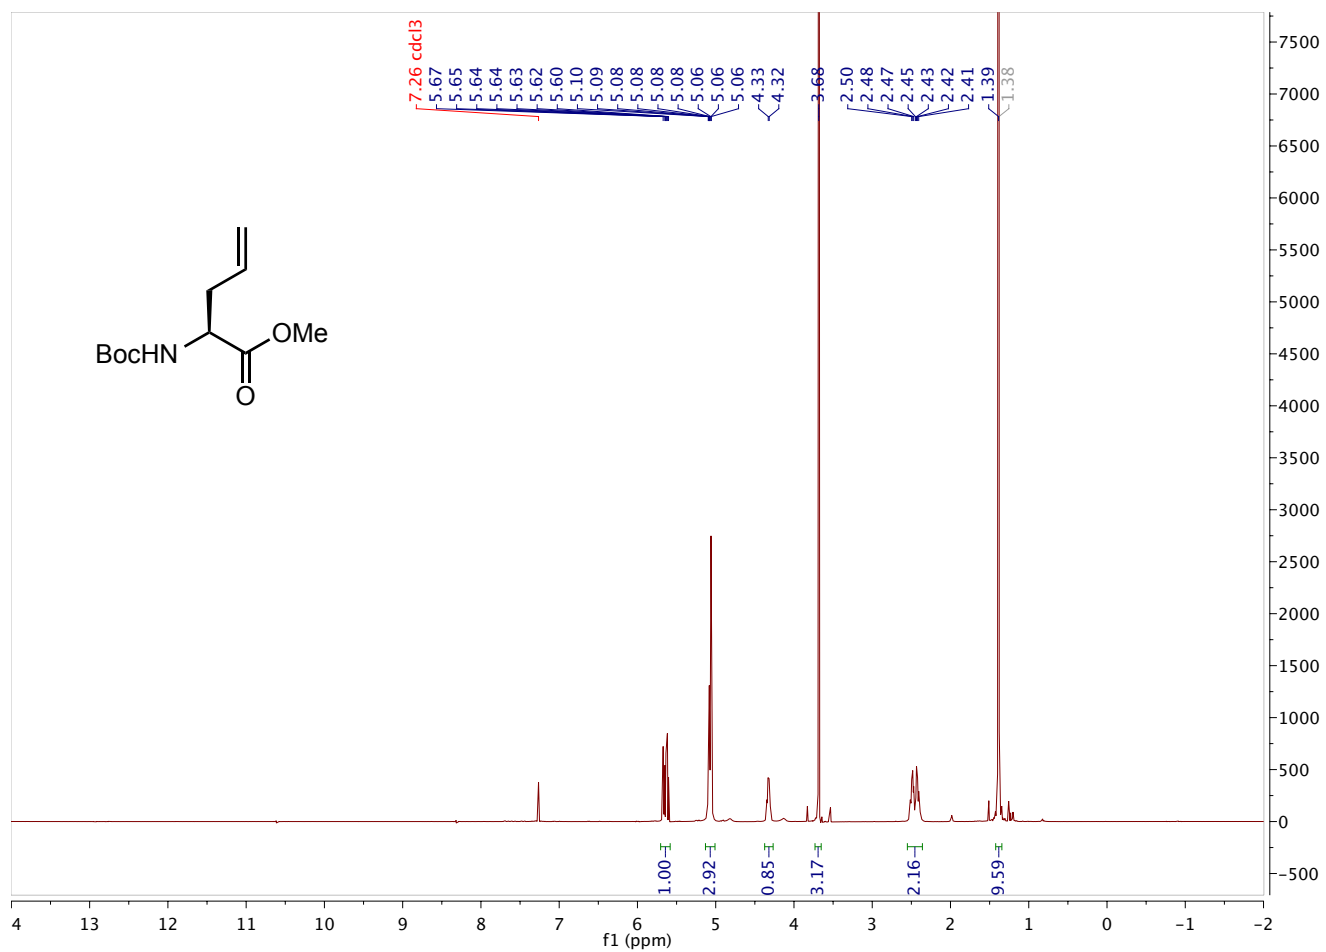



<sup>13</sup>C NMR (126 MHz, CDCl<sub>3</sub>) spectrum of compound **S1**

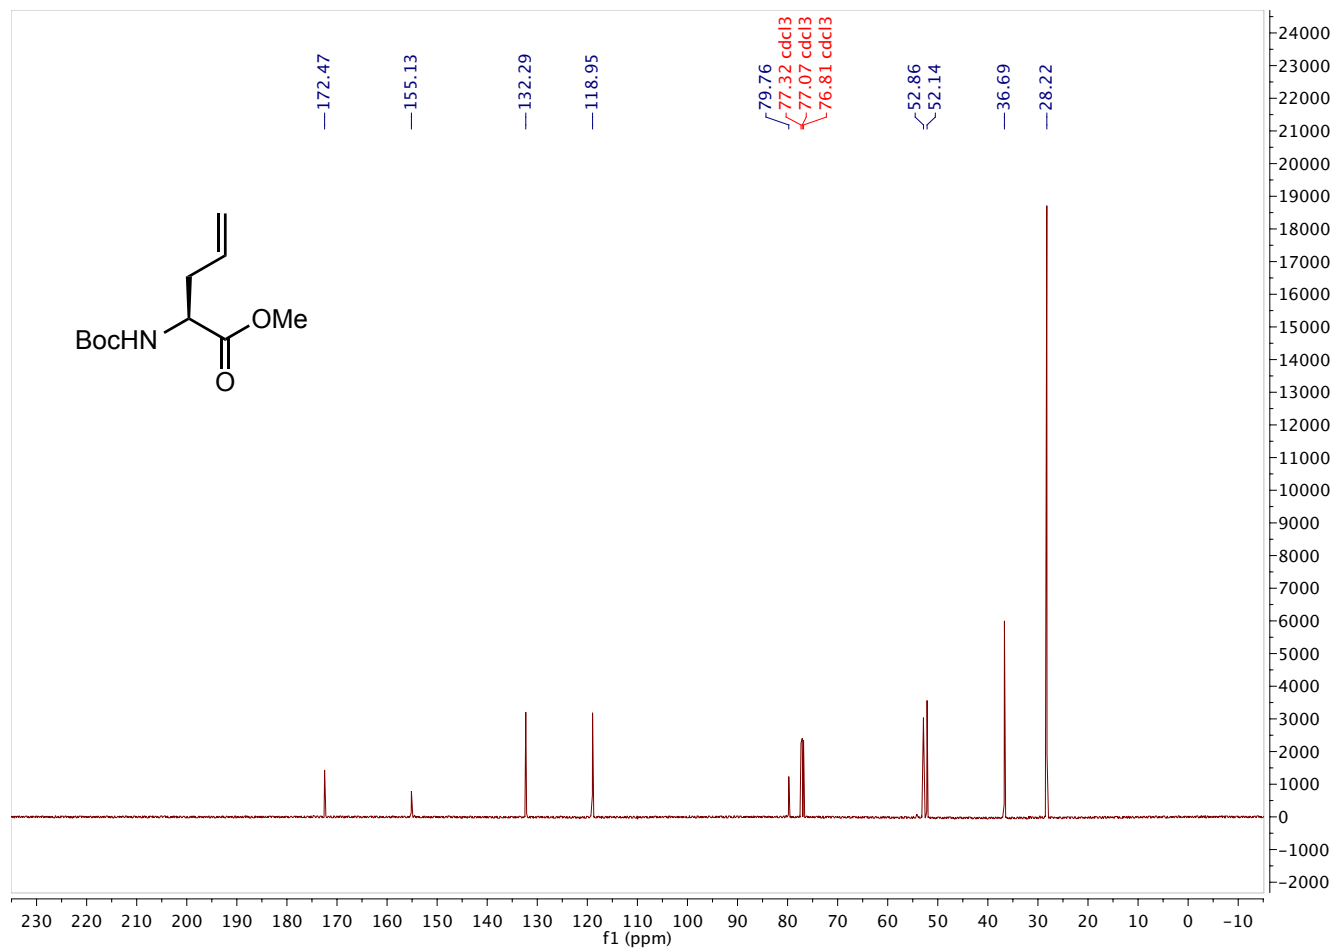

<sup>1</sup>H NMR (500 MHz, CDCl<sub>3</sub>) spectrum of compound **S2**

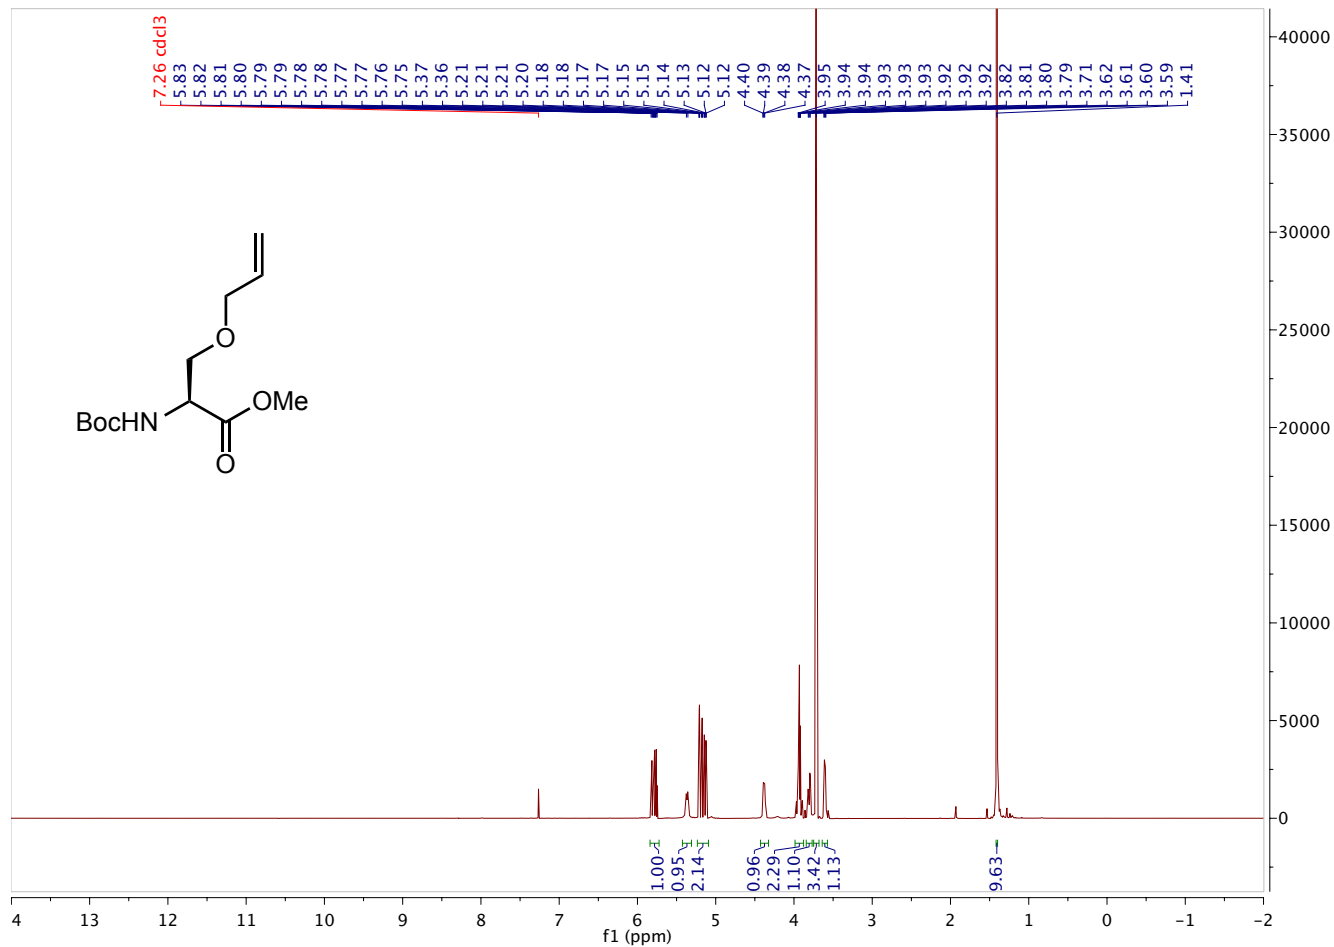

$^{13}\text{C}$  NMR (126 MHz,  $\text{CDCl}_3$ ) spectrum of compound **S2**

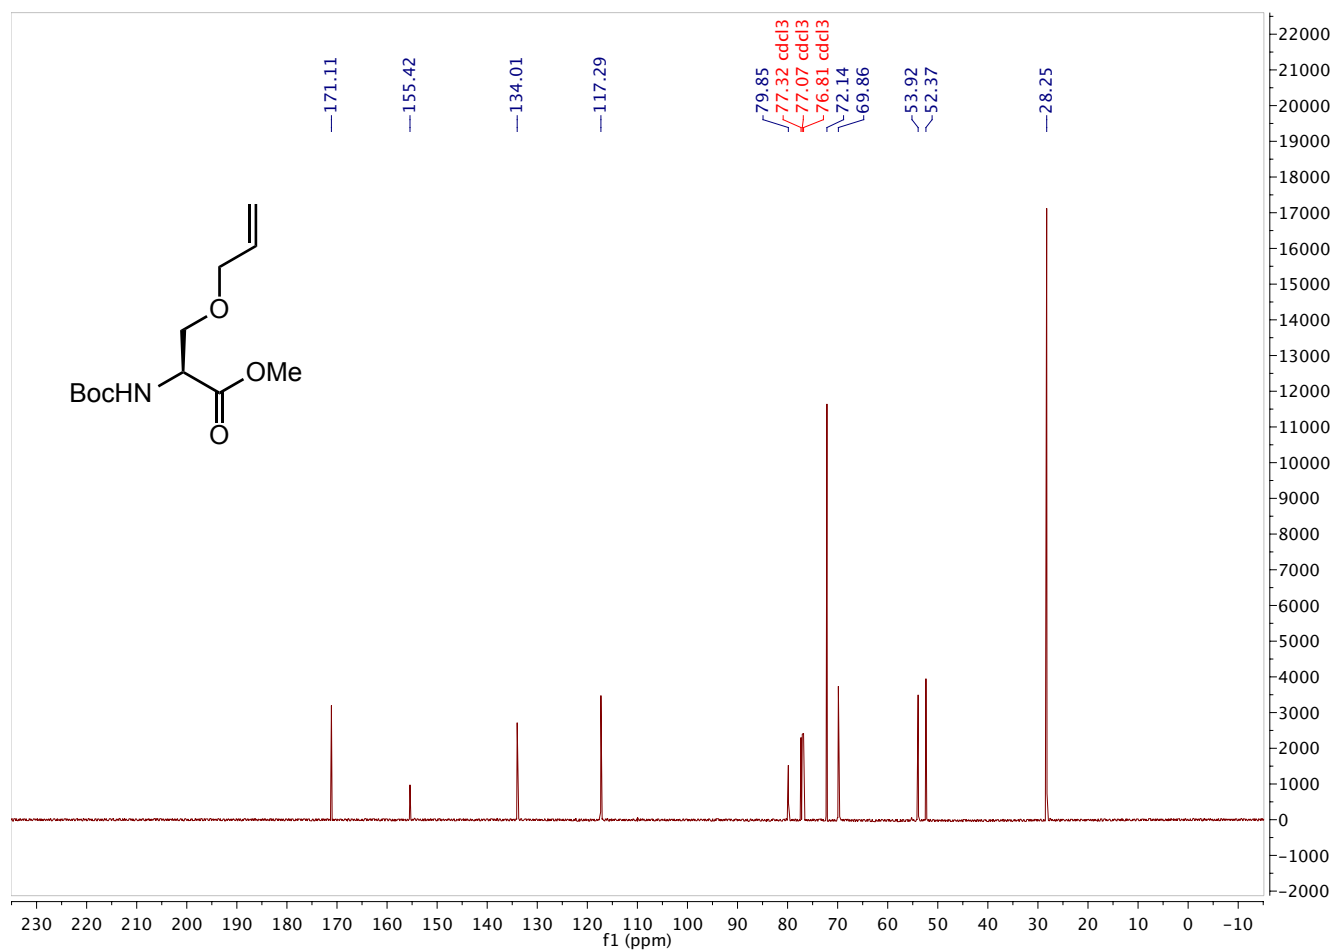

<sup>1</sup>H NMR (500 MHz, CDCl<sub>3</sub>) spectrum of compound **S3**

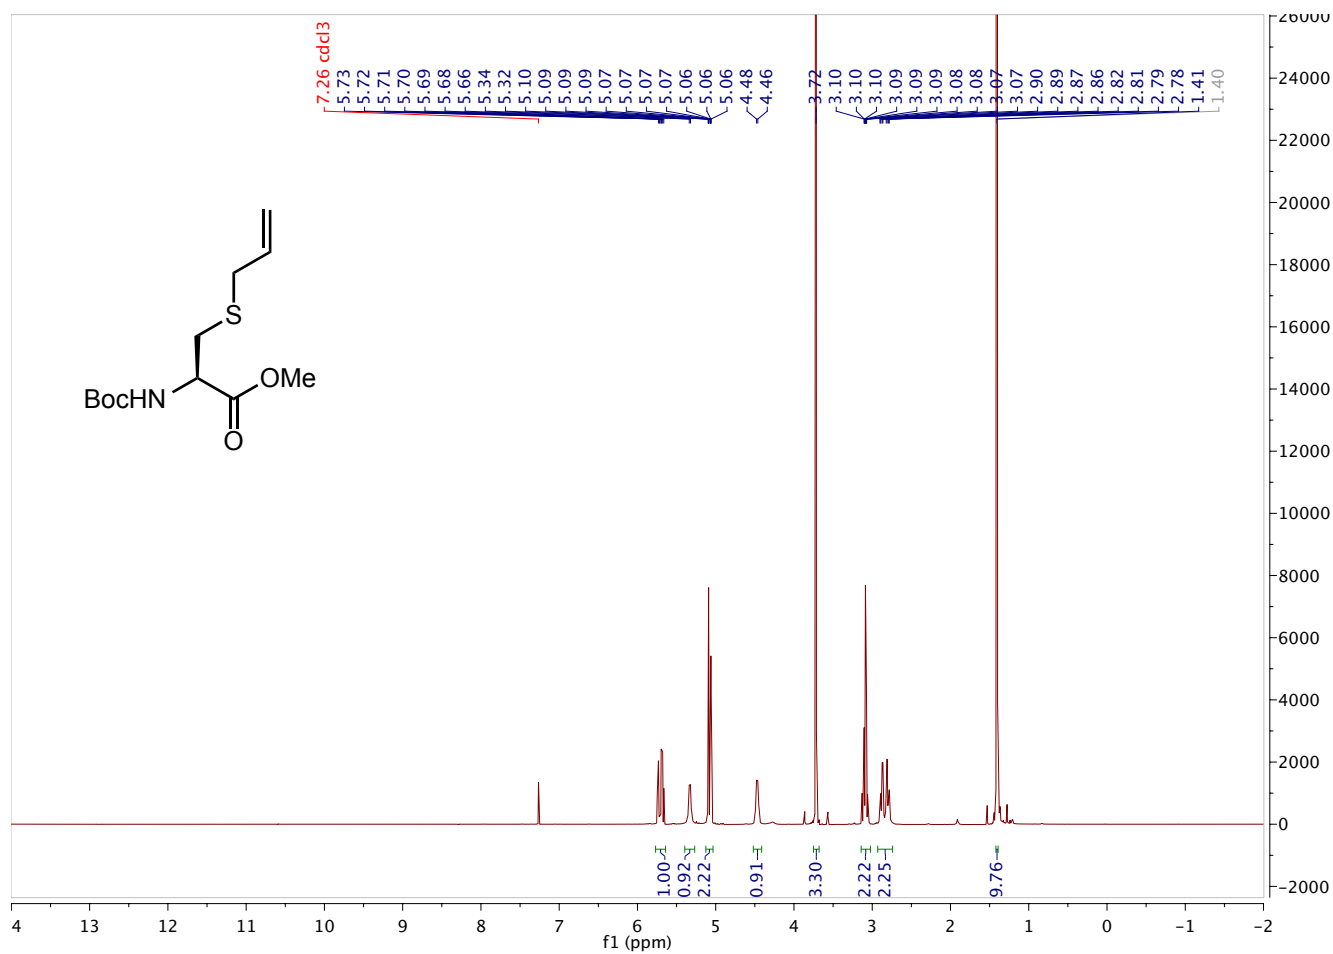

$^{13}\text{C}$  NMR (126 MHz,  $\text{CDCl}_3$ ) spectrum of compound **S3**

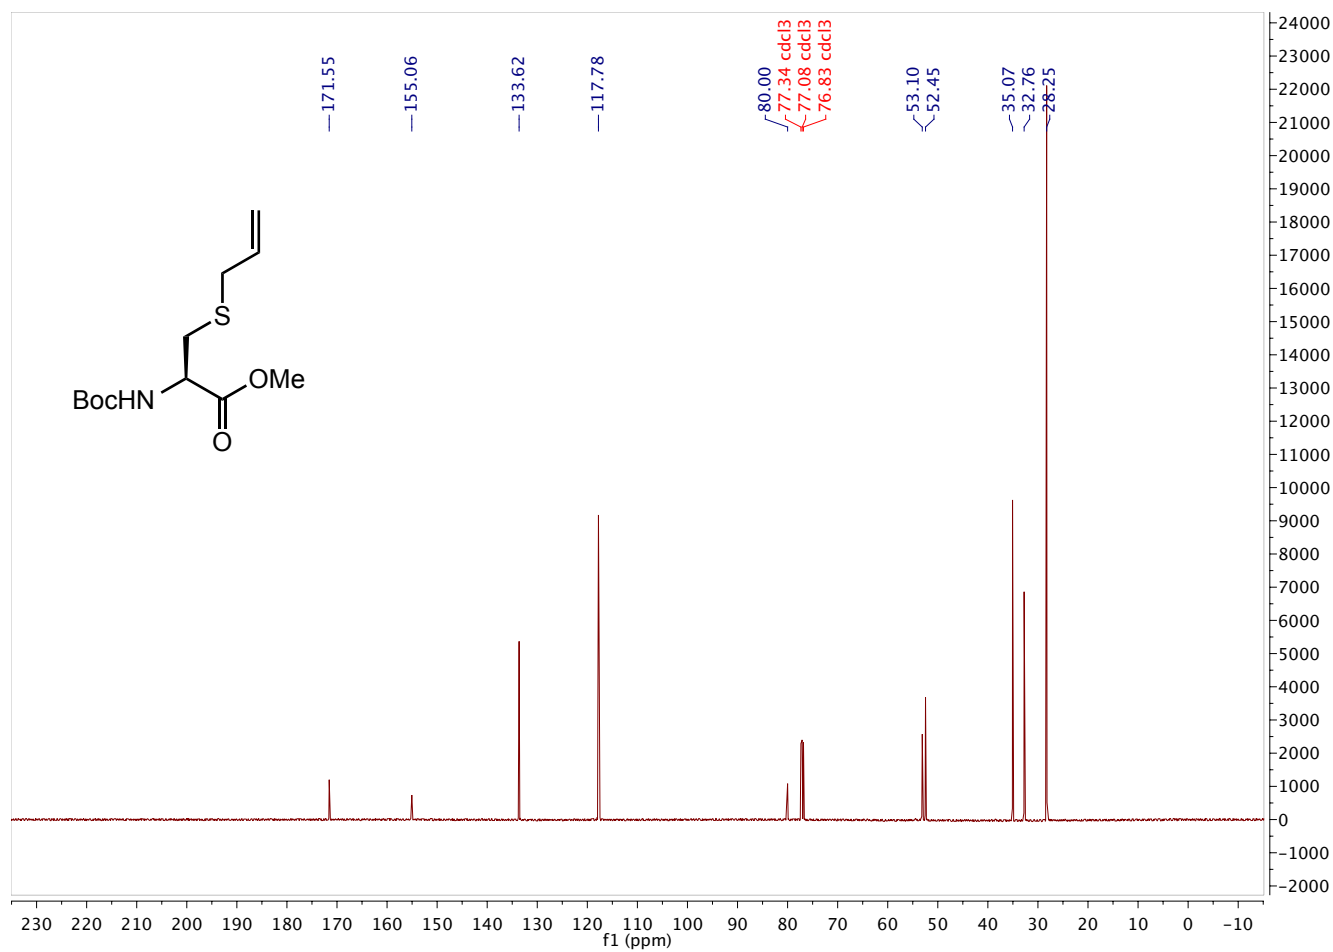

$^1\text{H}$  NMR (500 MHz,  $\text{CDCl}_3$ ) spectrum of compound **S4**

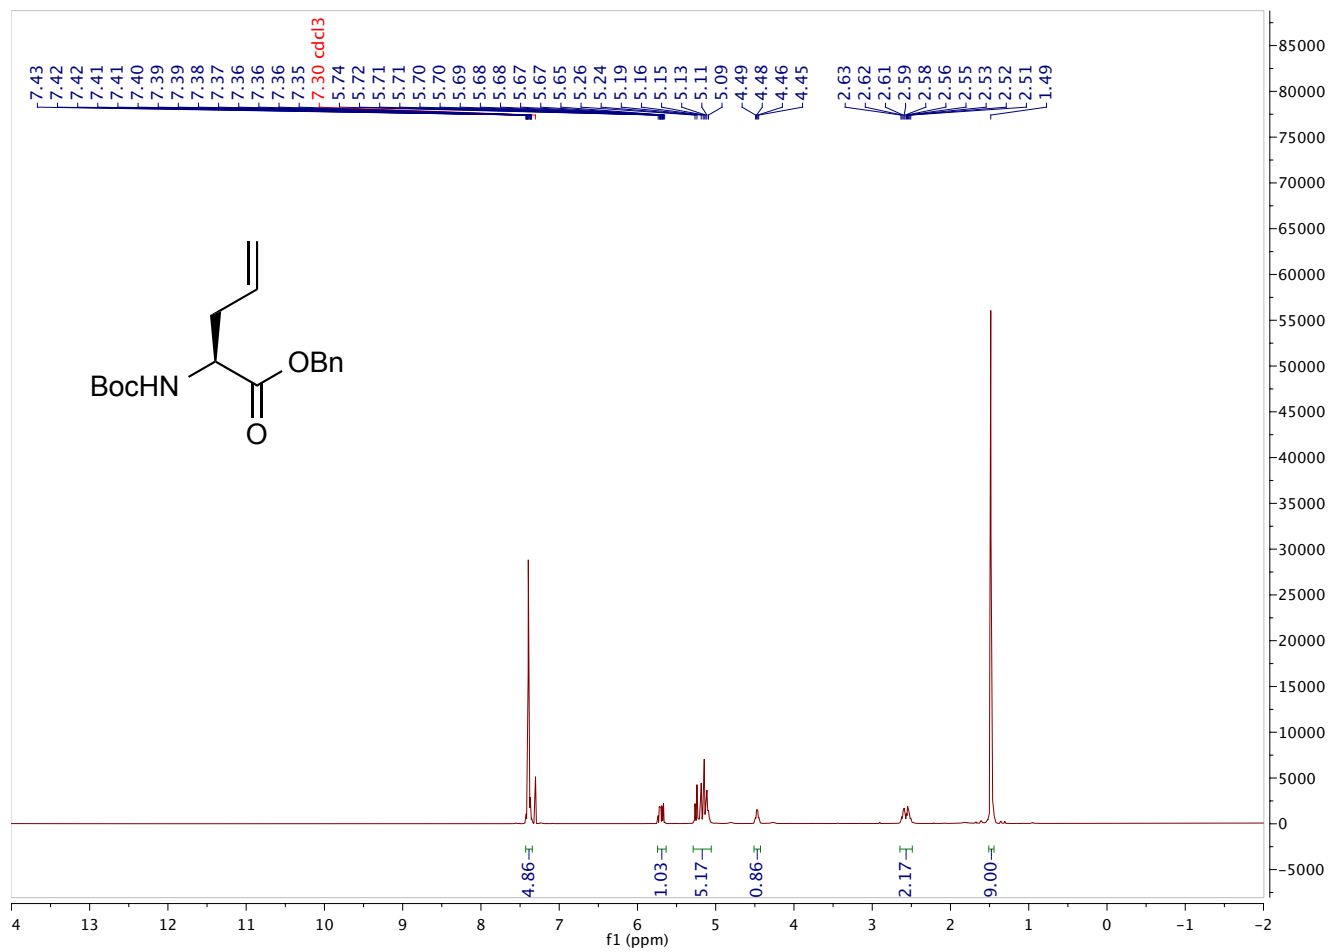

$^{13}\text{C}$  NMR (126 MHz,  $\text{CDCl}_3$ ) spectrum of compound **S4**

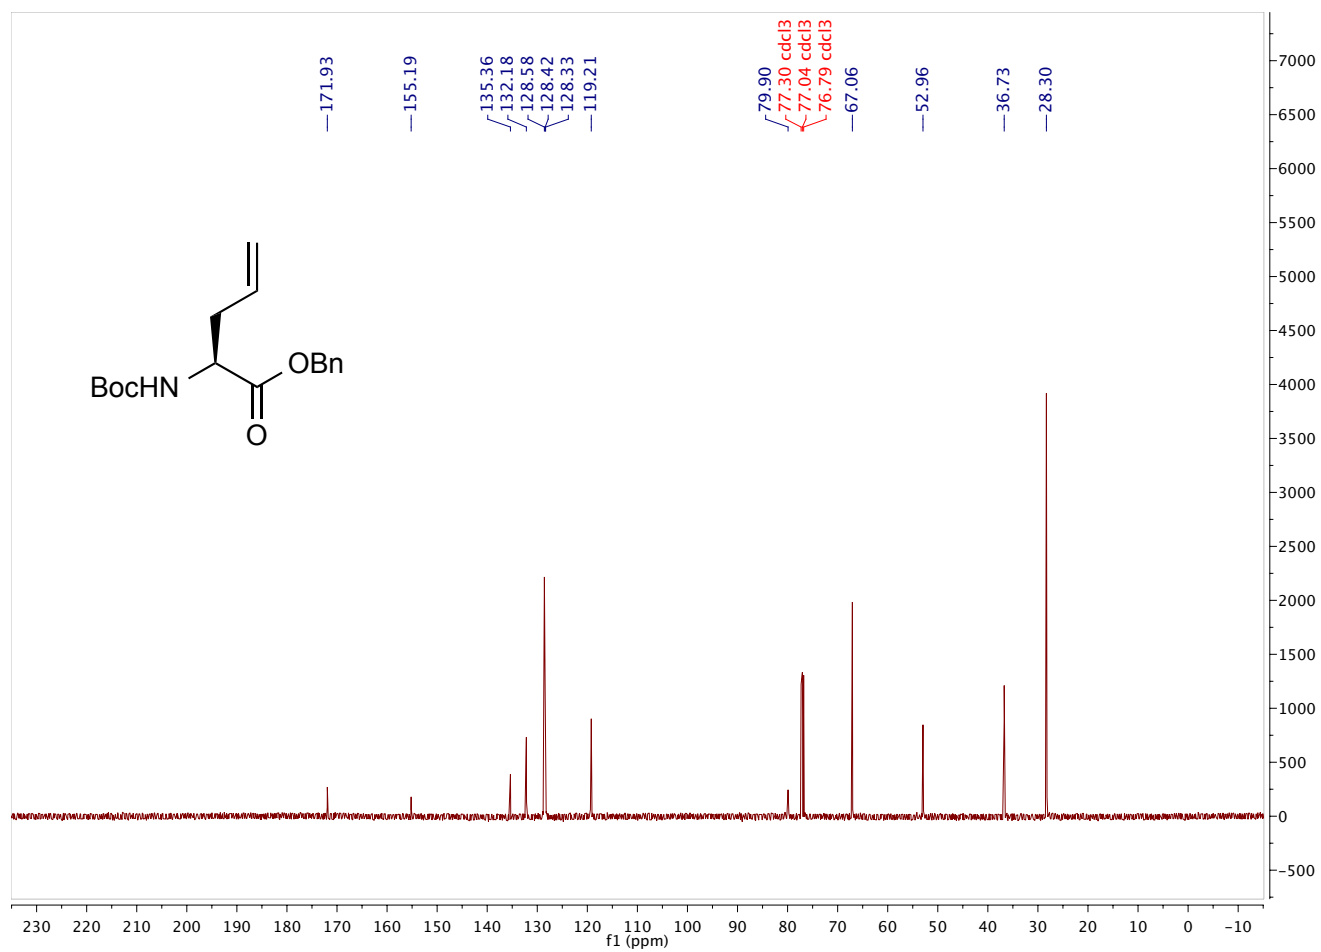

$^1\text{H}$  NMR (500 MHz,  $\text{CDCl}_3$ ) spectrum of compound **S5**

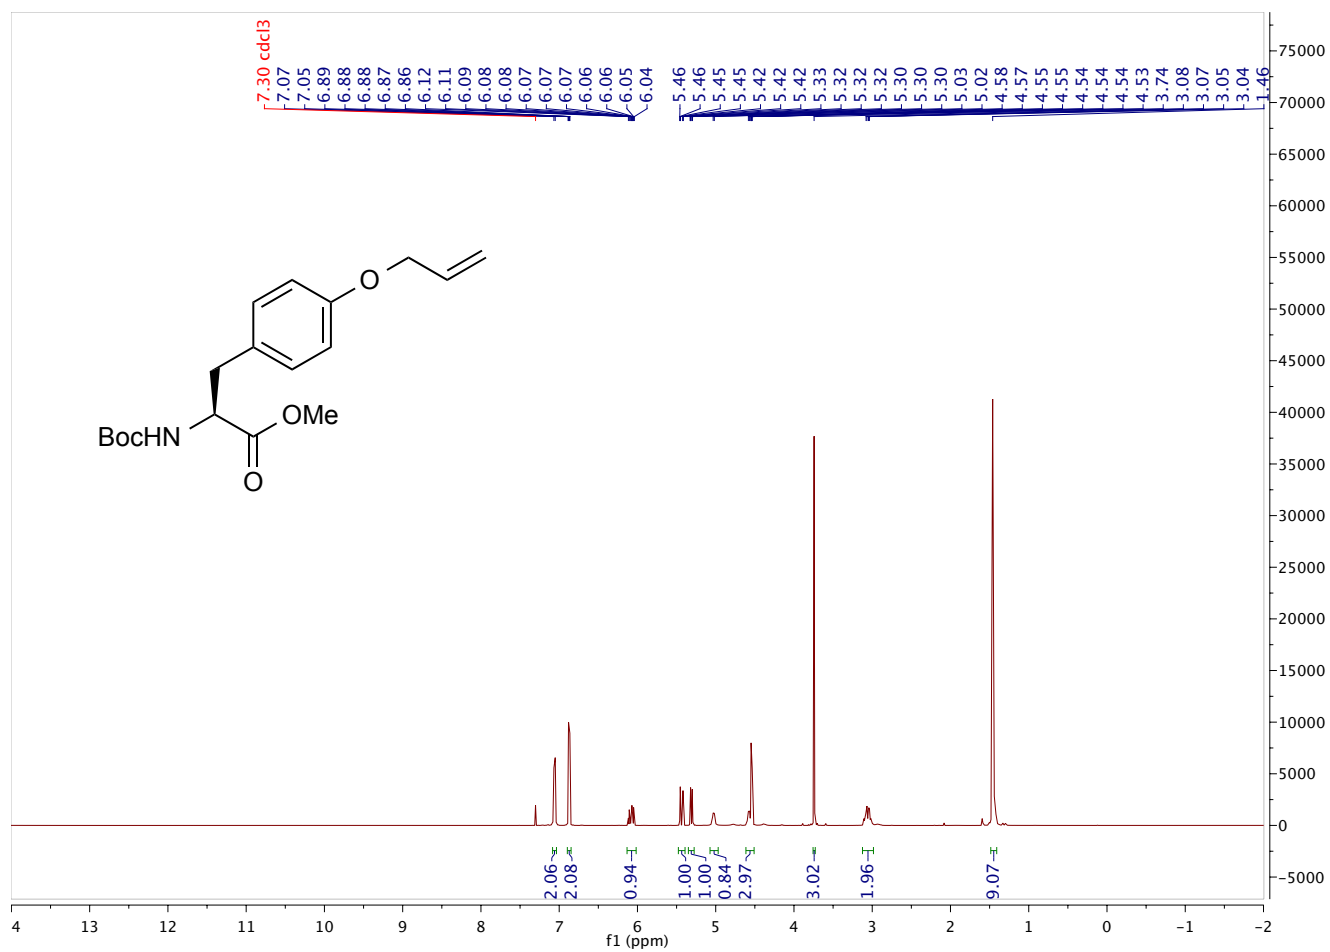



$^{13}\text{C}$  NMR (126 MHz,  $\text{CDCl}_3$ ) spectrum of compound **S5**

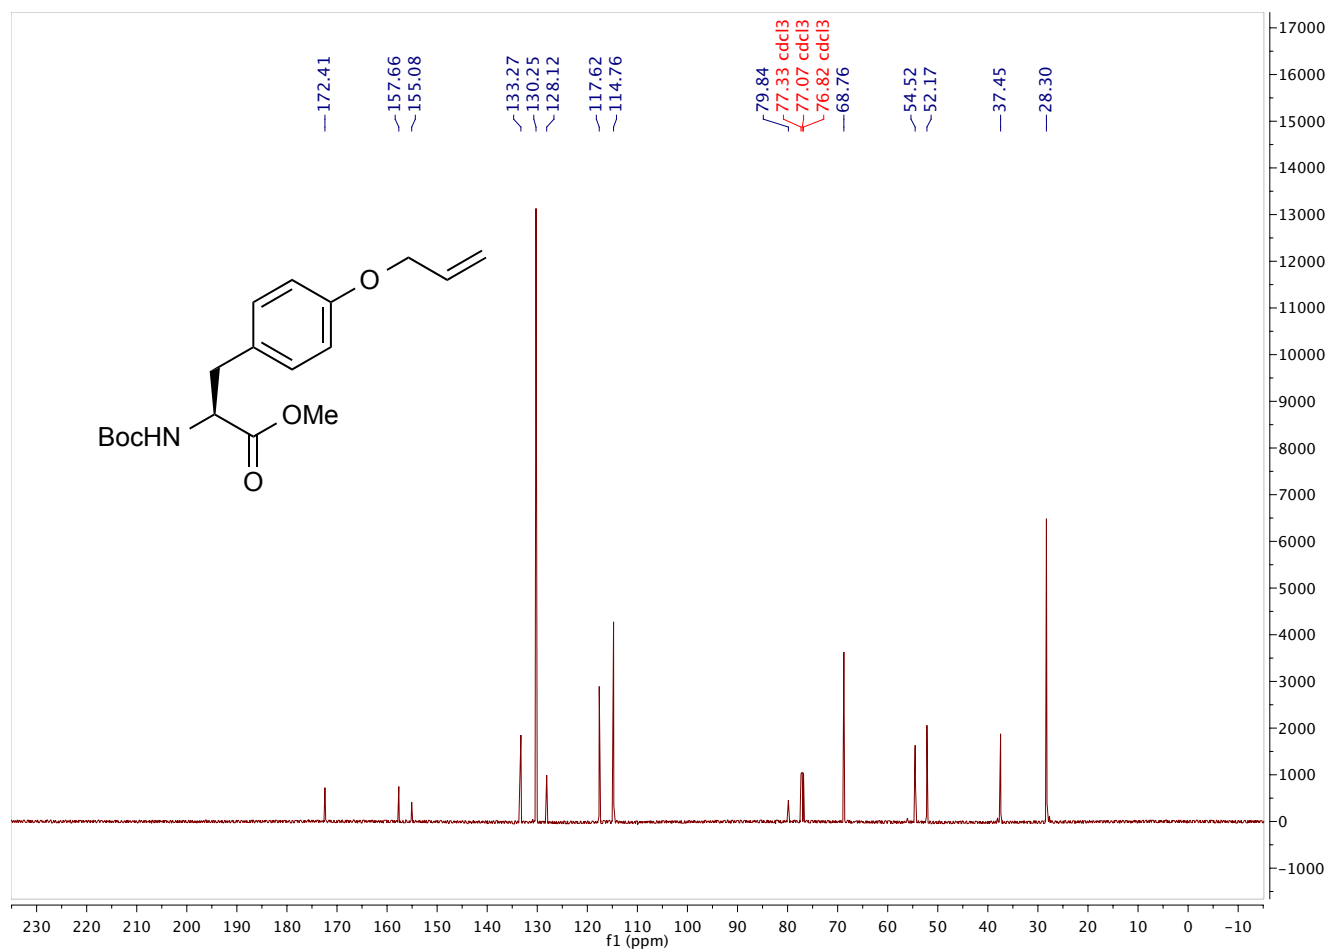

$^1\text{H}$  NMR (500 MHz,  $\text{CDCl}_3$ ) spectrum of compound **S6**

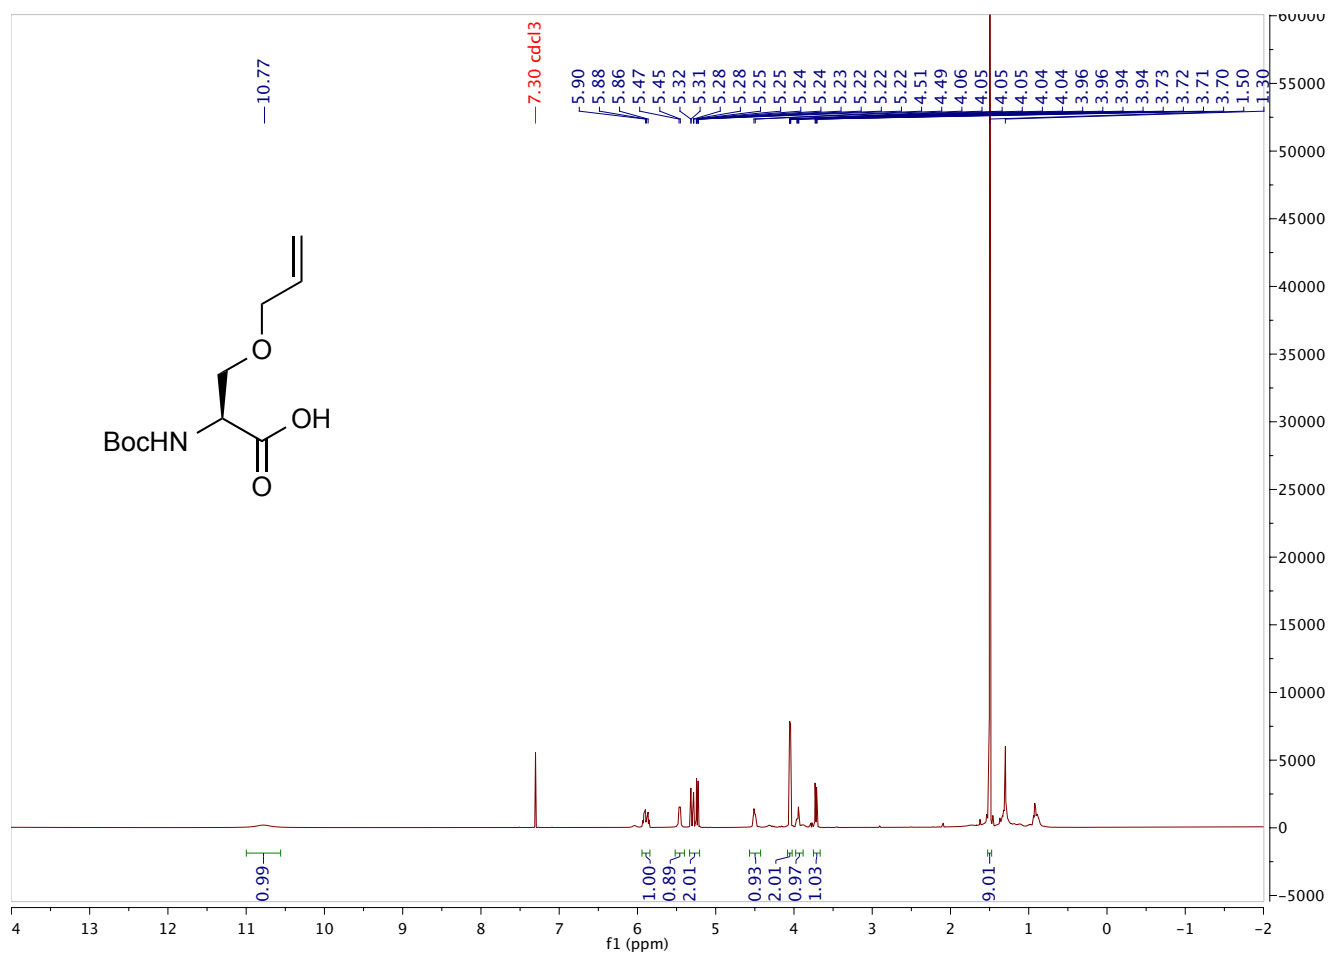

$^{13}\text{C}$  NMR (126 MHz,  $\text{CDCl}_3$ ) spectrum of compound **S6**

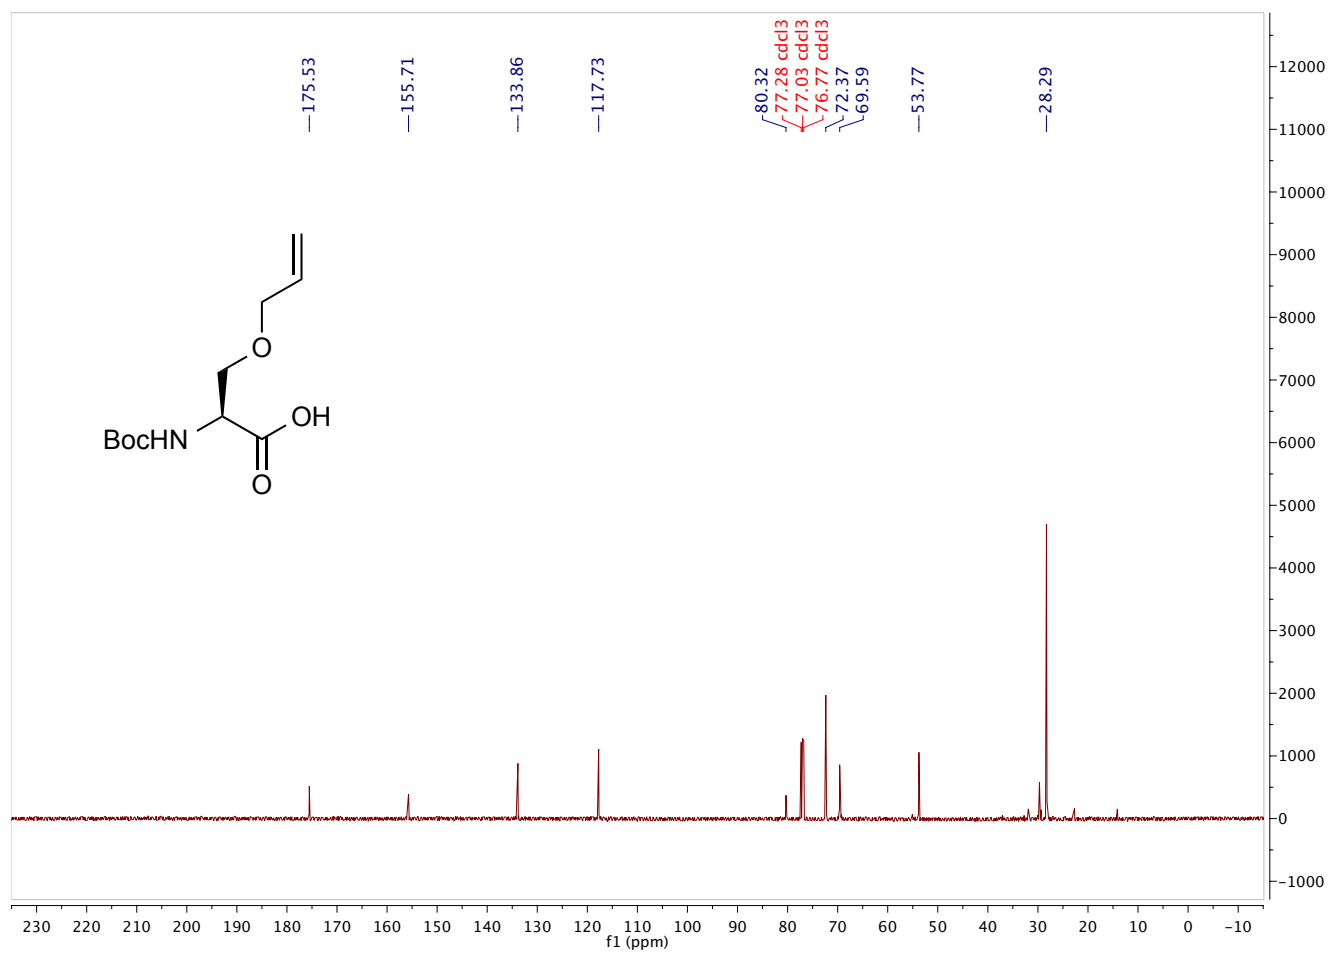

<sup>1</sup>H NMR (500 MHz, CDCl<sub>3</sub>) spectrum of compound **S7**

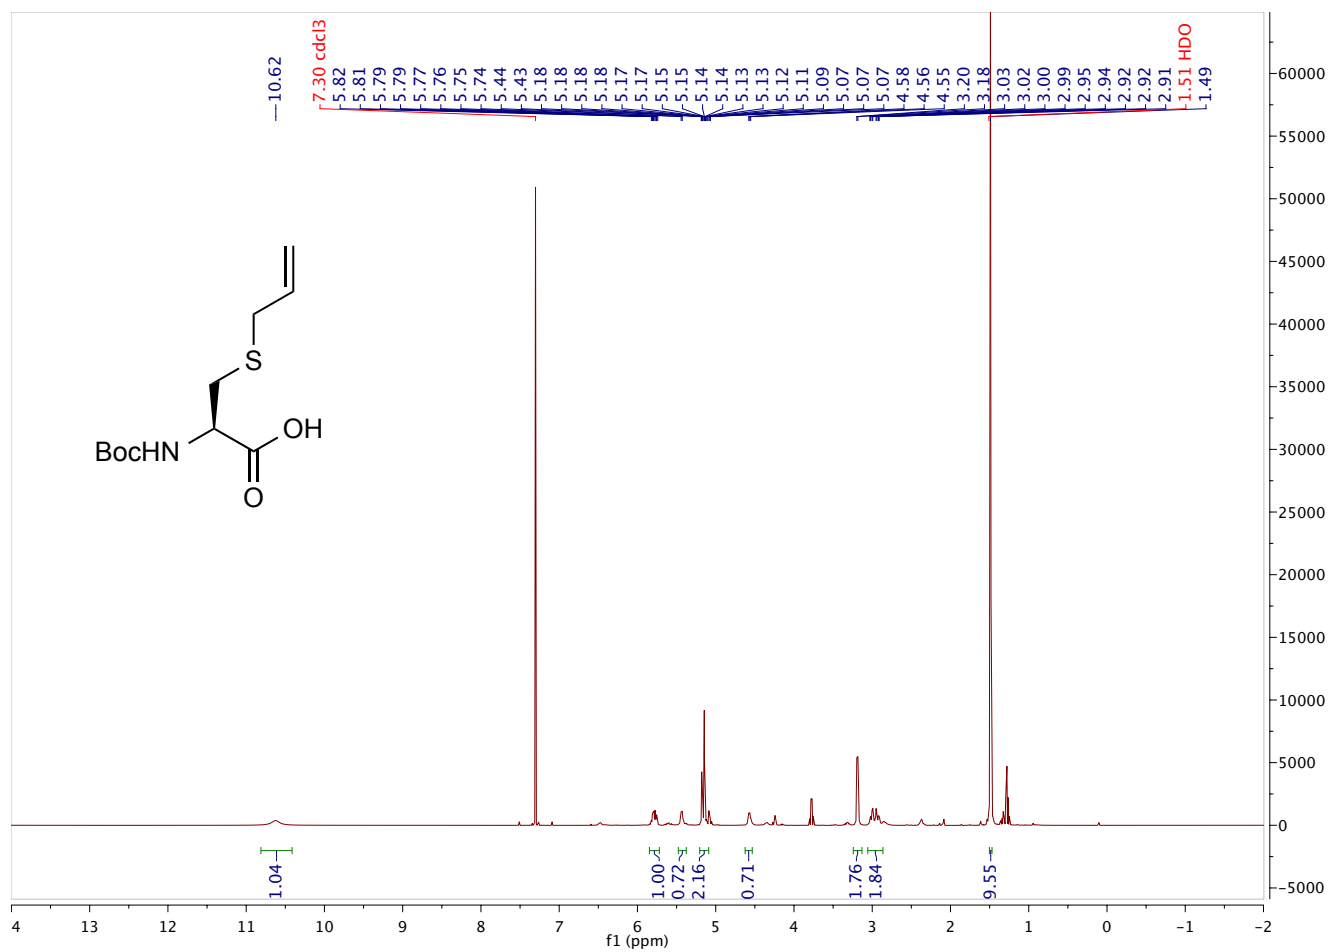

$^{13}\text{C}$  NMR (126 MHz,  $\text{CDCl}_3$ ) spectrum of compound **S7**

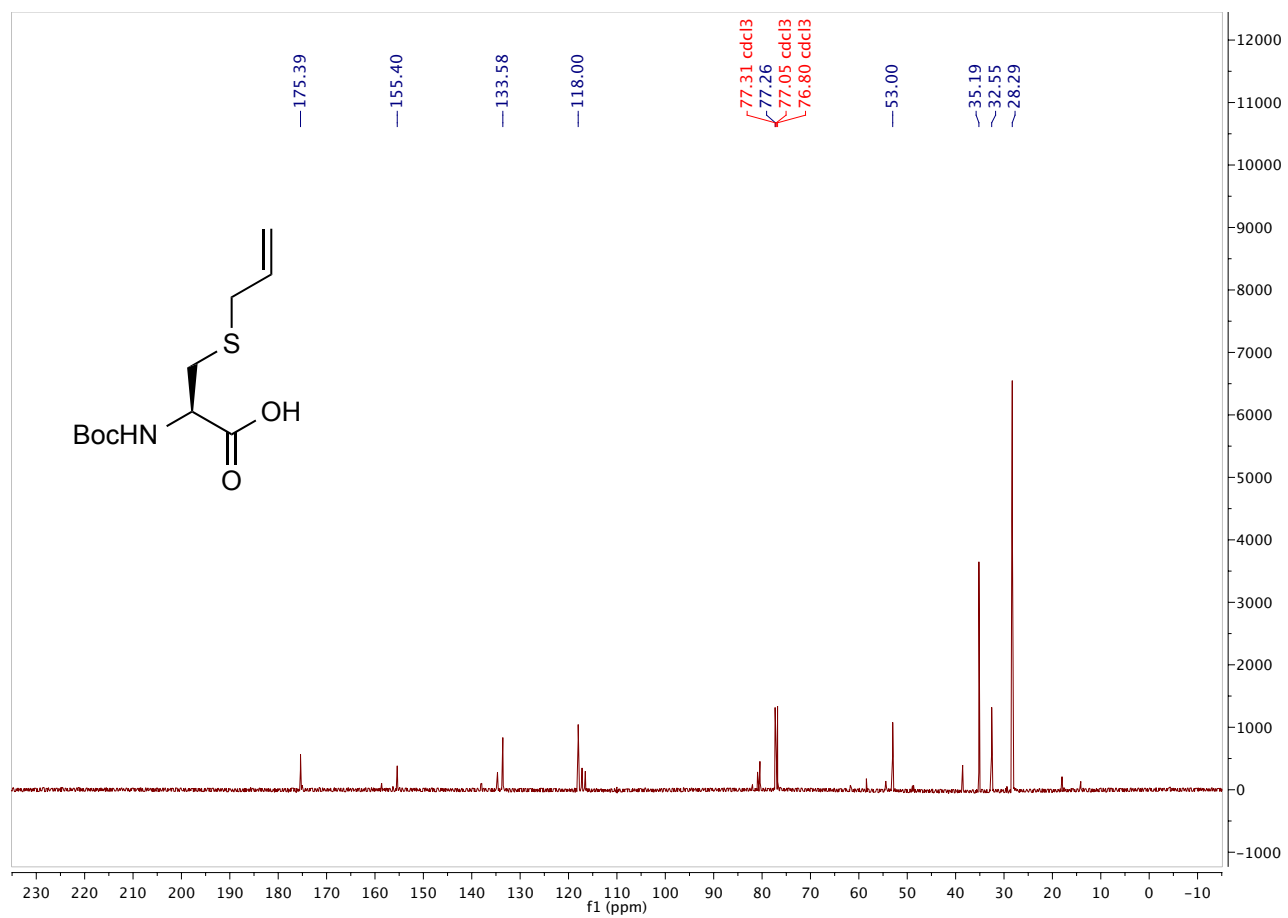

$^1\text{H}$  NMR (500 MHz,  $\text{CDCl}_3$ ) spectrum of compound **S8**

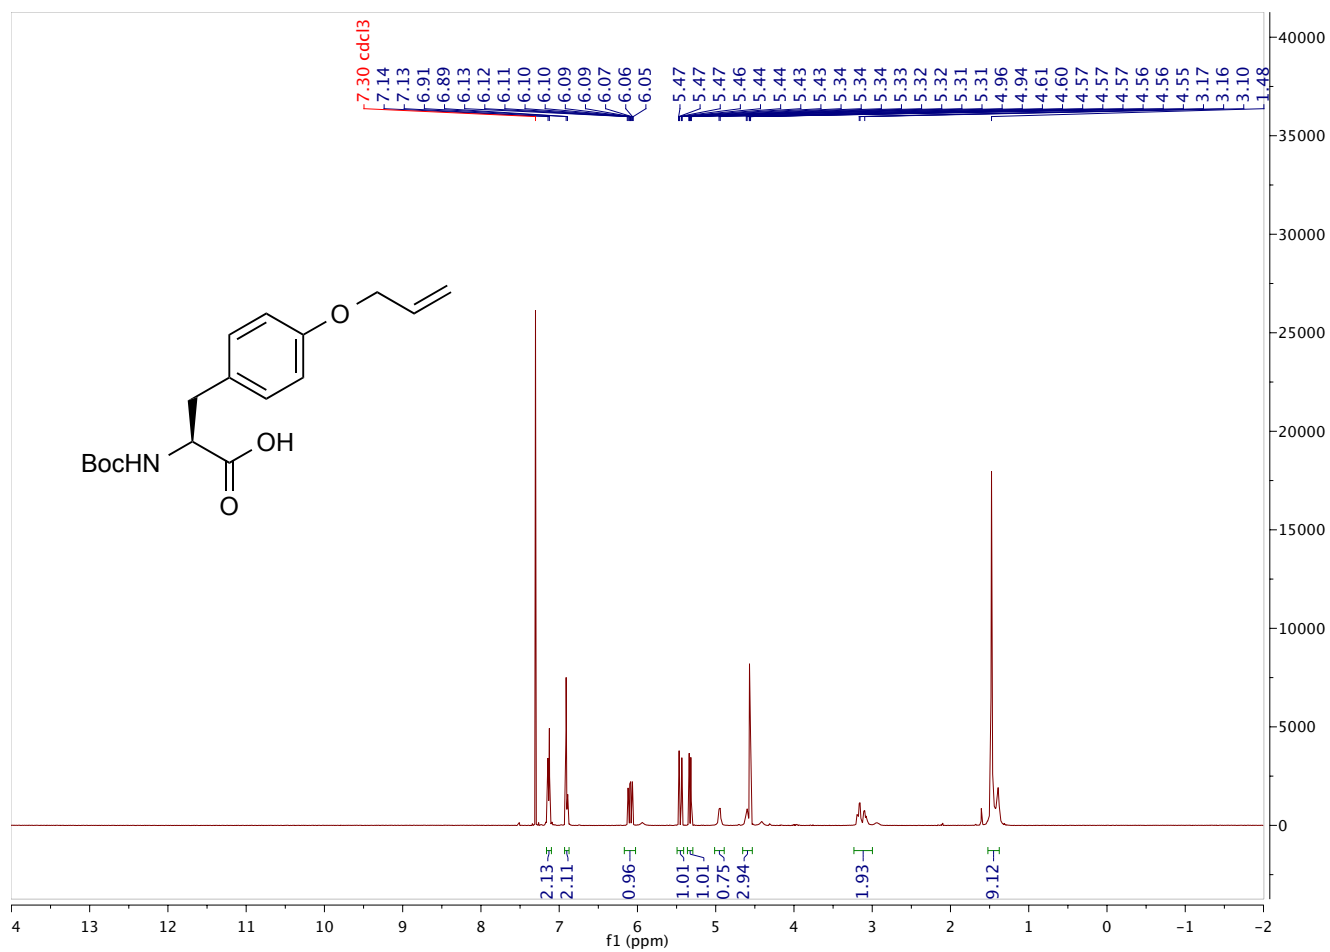

$^{13}\text{C}$  NMR (126 MHz,  $\text{CDCl}_3$ ) spectrum of compound **S8**

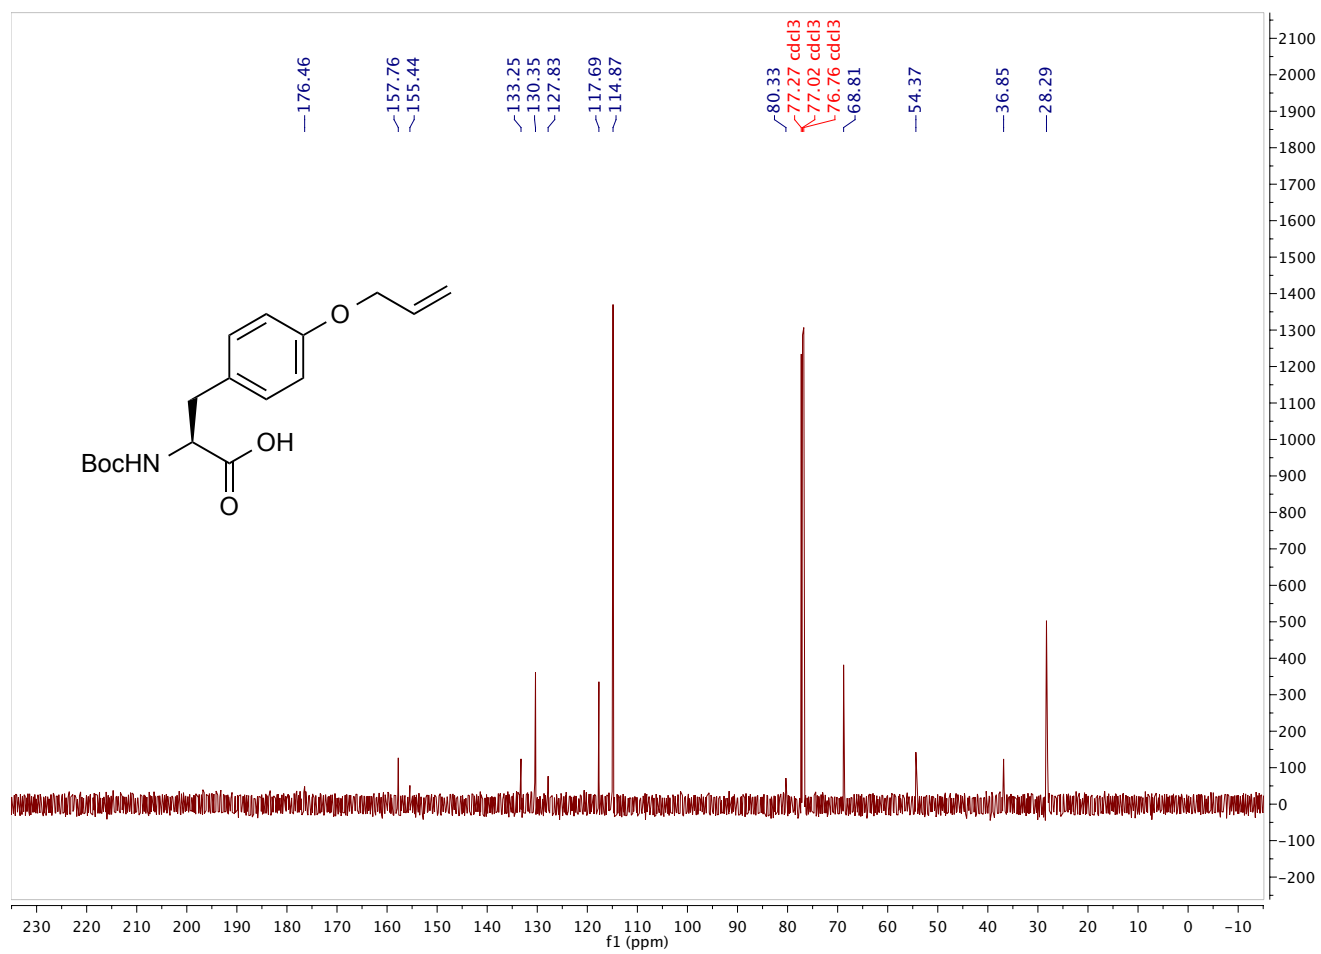

<sup>1</sup>H NMR (500 MHz, CDCl<sub>3</sub>) spectrum of compound **S11**

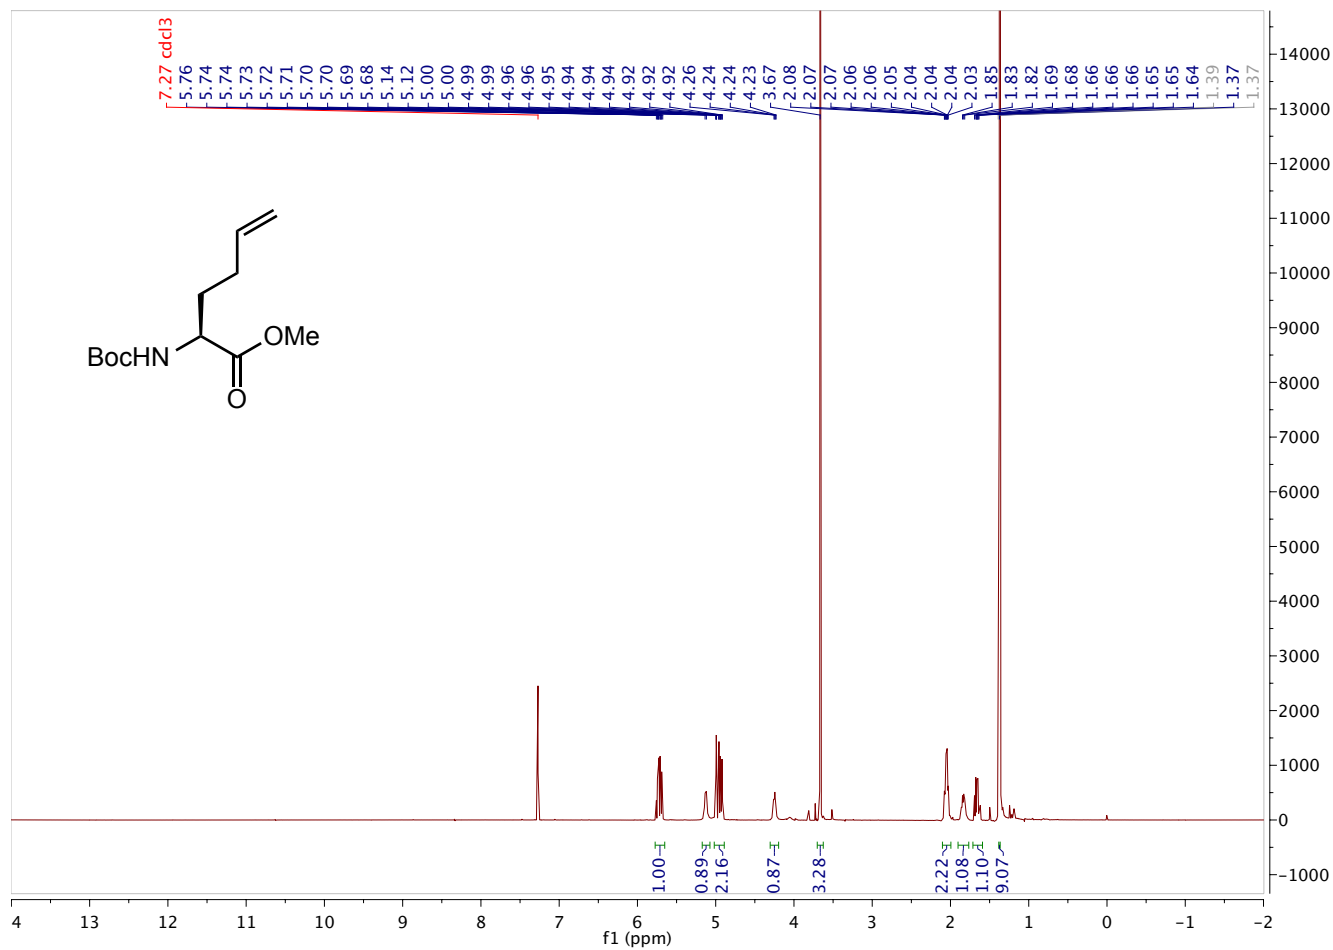



$^{13}\text{C}$  NMR (126 MHz,  $\text{CDCl}_3$ ) spectrum of compound **S11**

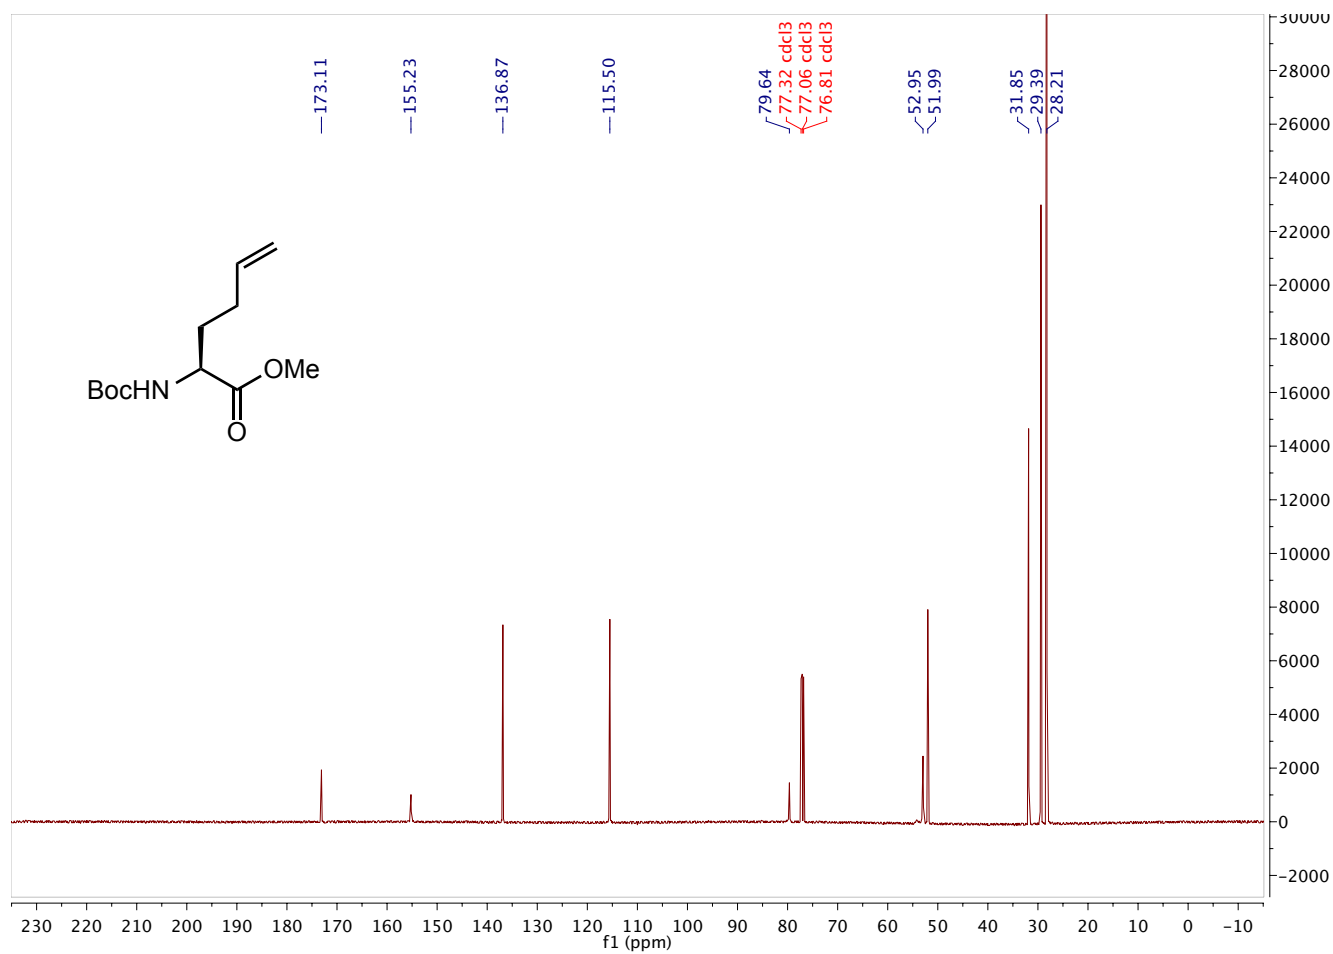

<sup>1</sup>H NMR (500 MHz, CDCl<sub>3</sub>) spectrum of compound **S12**

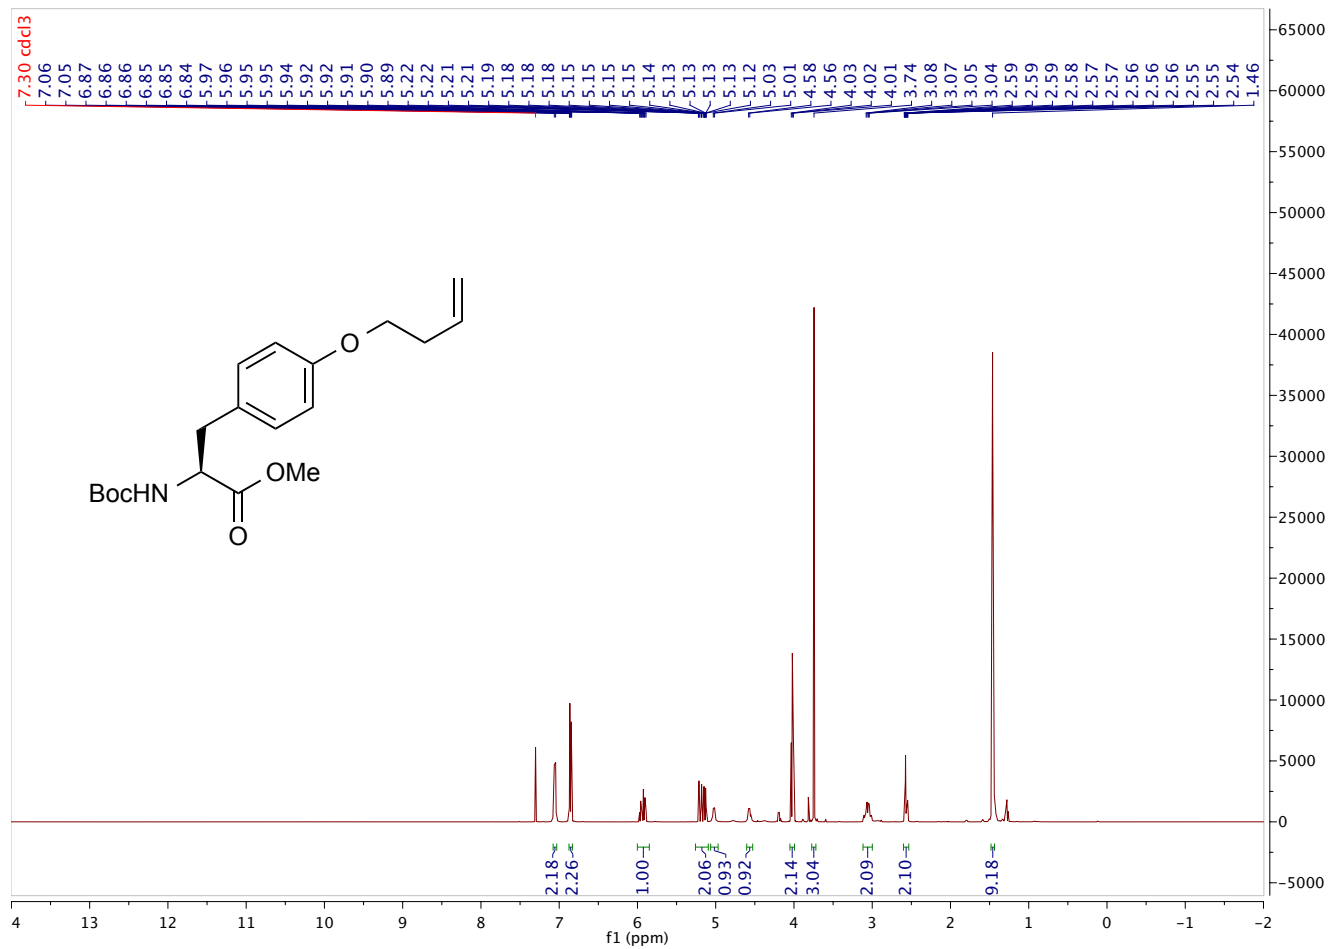

$^{13}\text{C}$  NMR (126 MHz,  $\text{CDCl}_3$ ) spectrum of compound **S12**

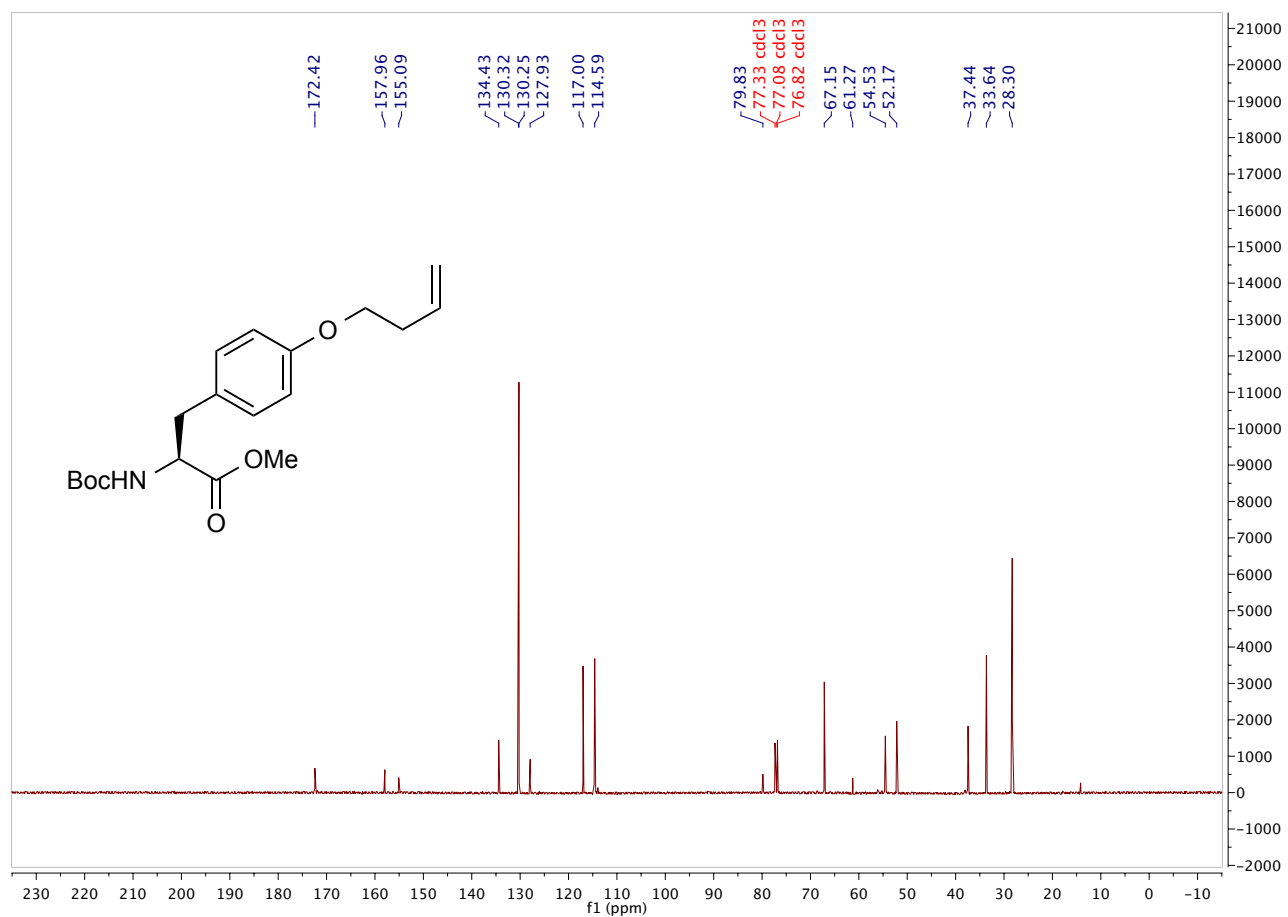

$^1\text{H}$  NMR (500 MHz,  $\text{CDCl}_3$ ) spectrum of compound **S13**

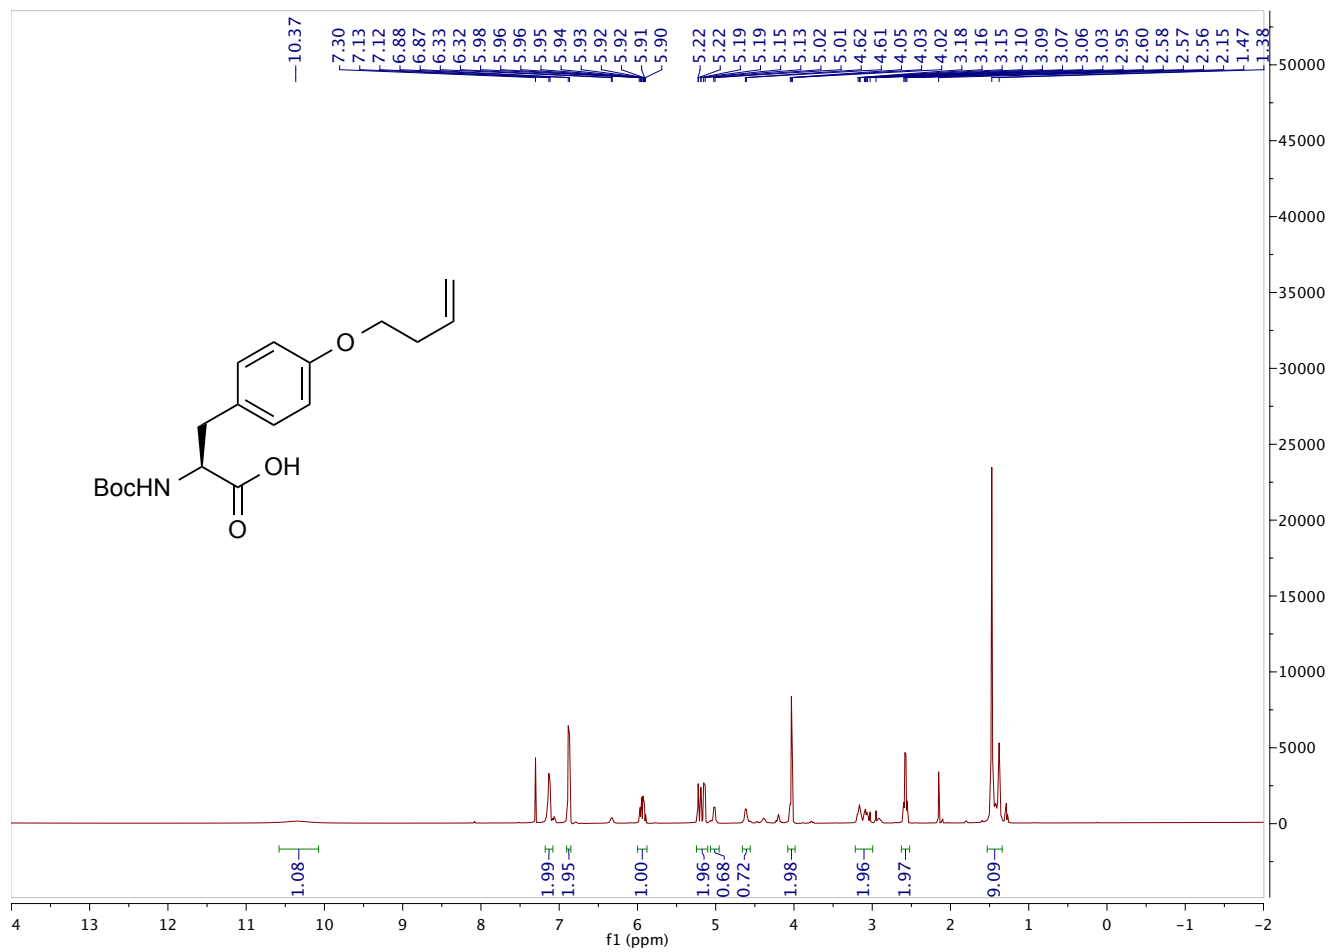

$^{13}\text{C}$  NMR (126 MHz,  $\text{CDCl}_3$ ) spectrum of compound **S13**

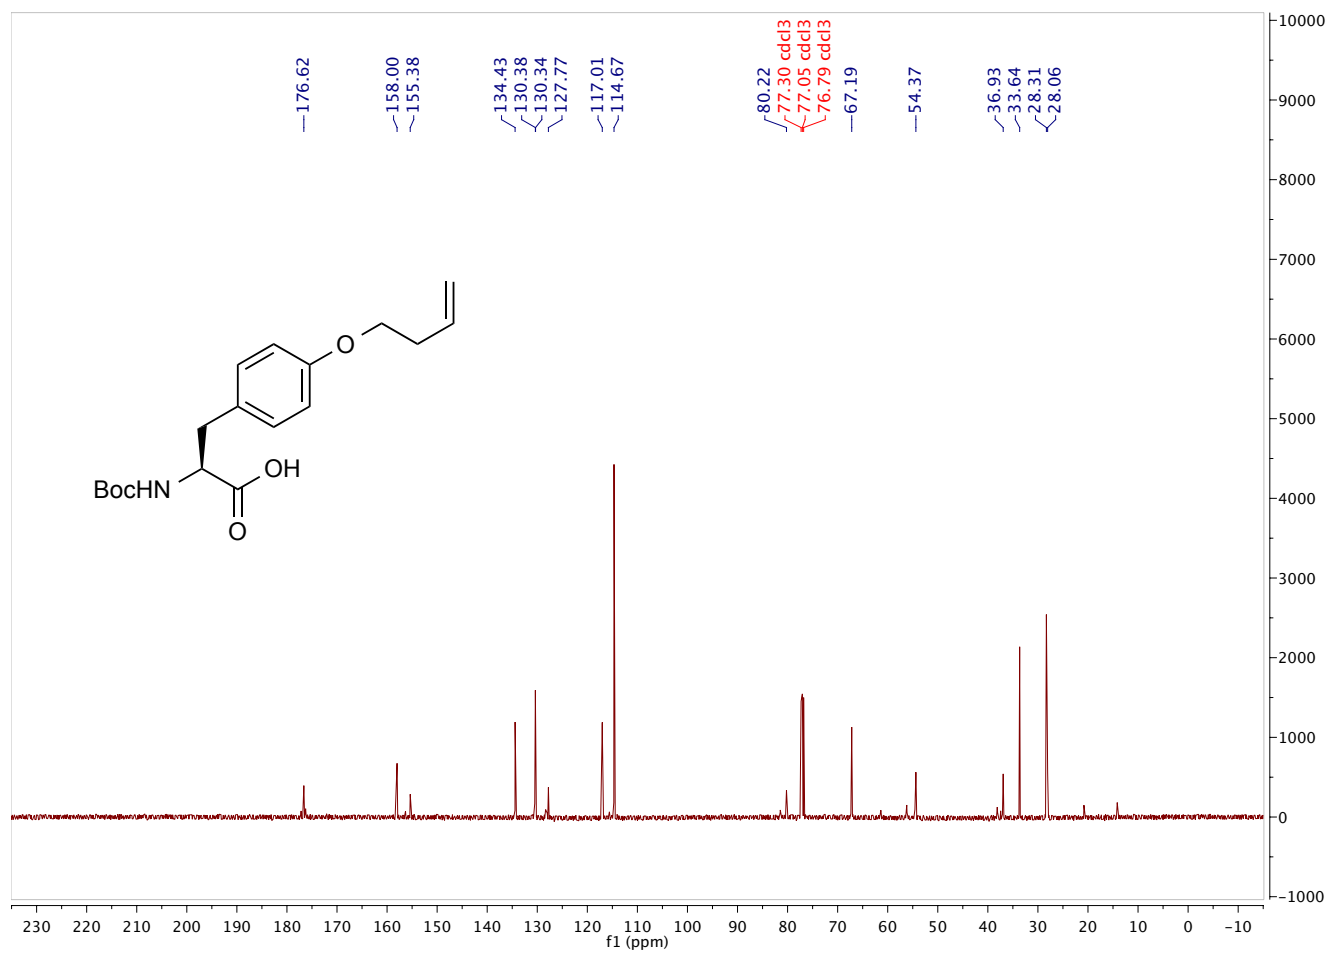

$^1\text{H}$  NMR (500 MHz,  $\text{CDCl}_3$ ) spectrum of compound **8a**

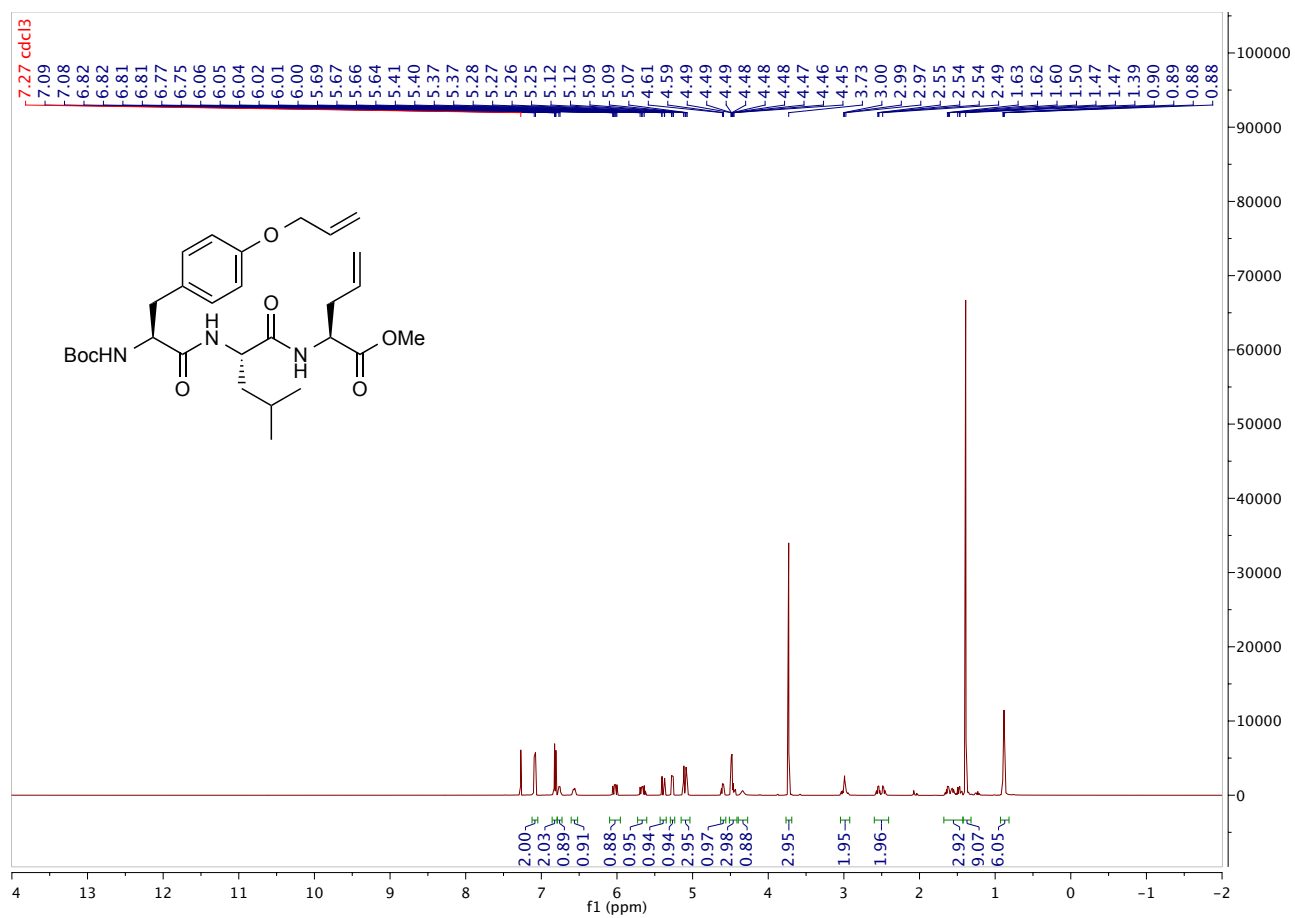

$^{13}\text{C}$  NMR (126 MHz,  $\text{CDCl}_3$ ) spectrum of compound **8a**

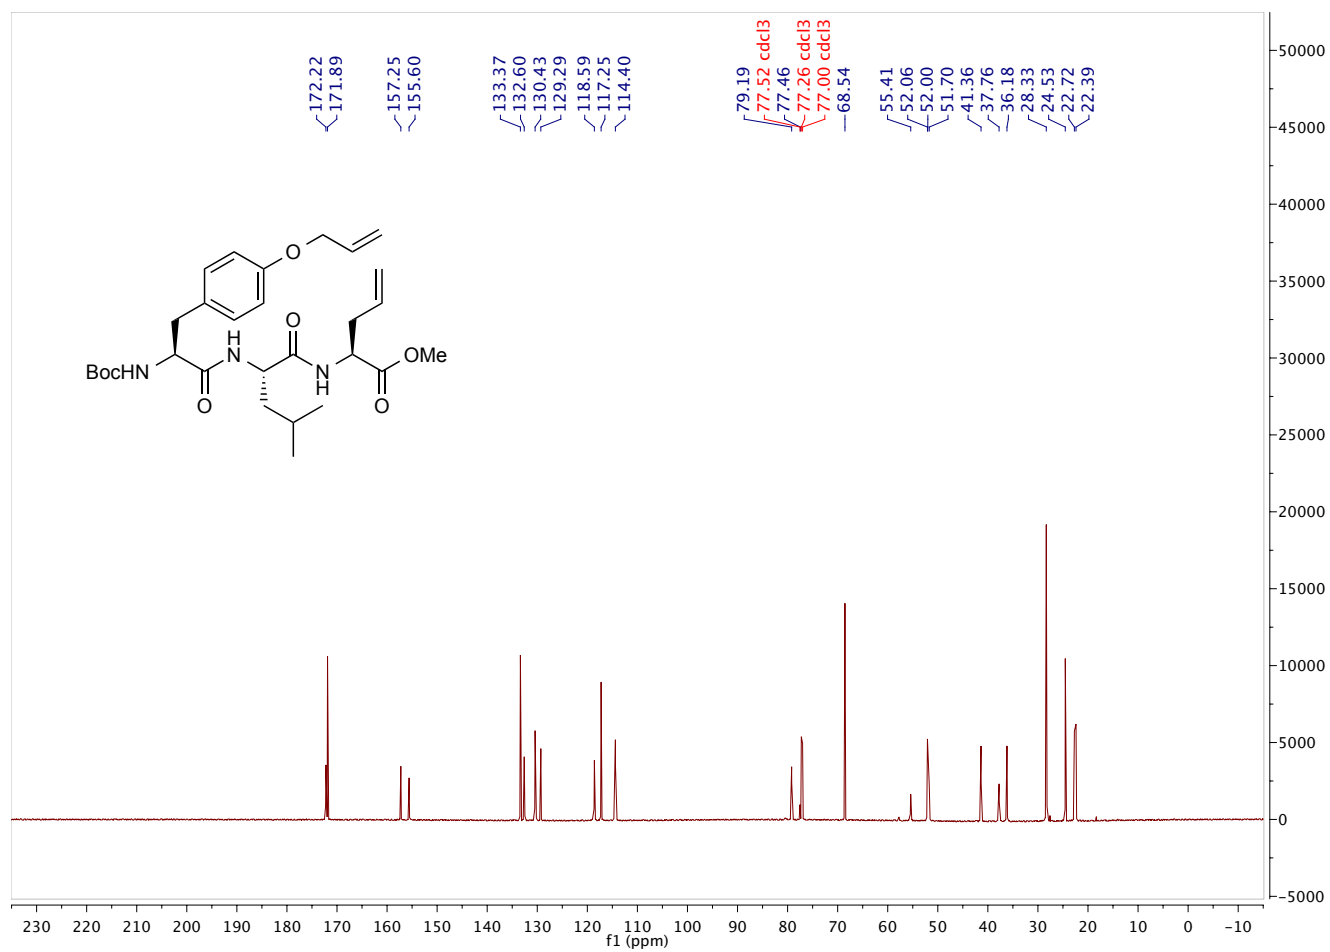

$^1\text{H}$  NMR (500 MHz,  $\text{CDCl}_3$ ) spectrum of compound **8b**

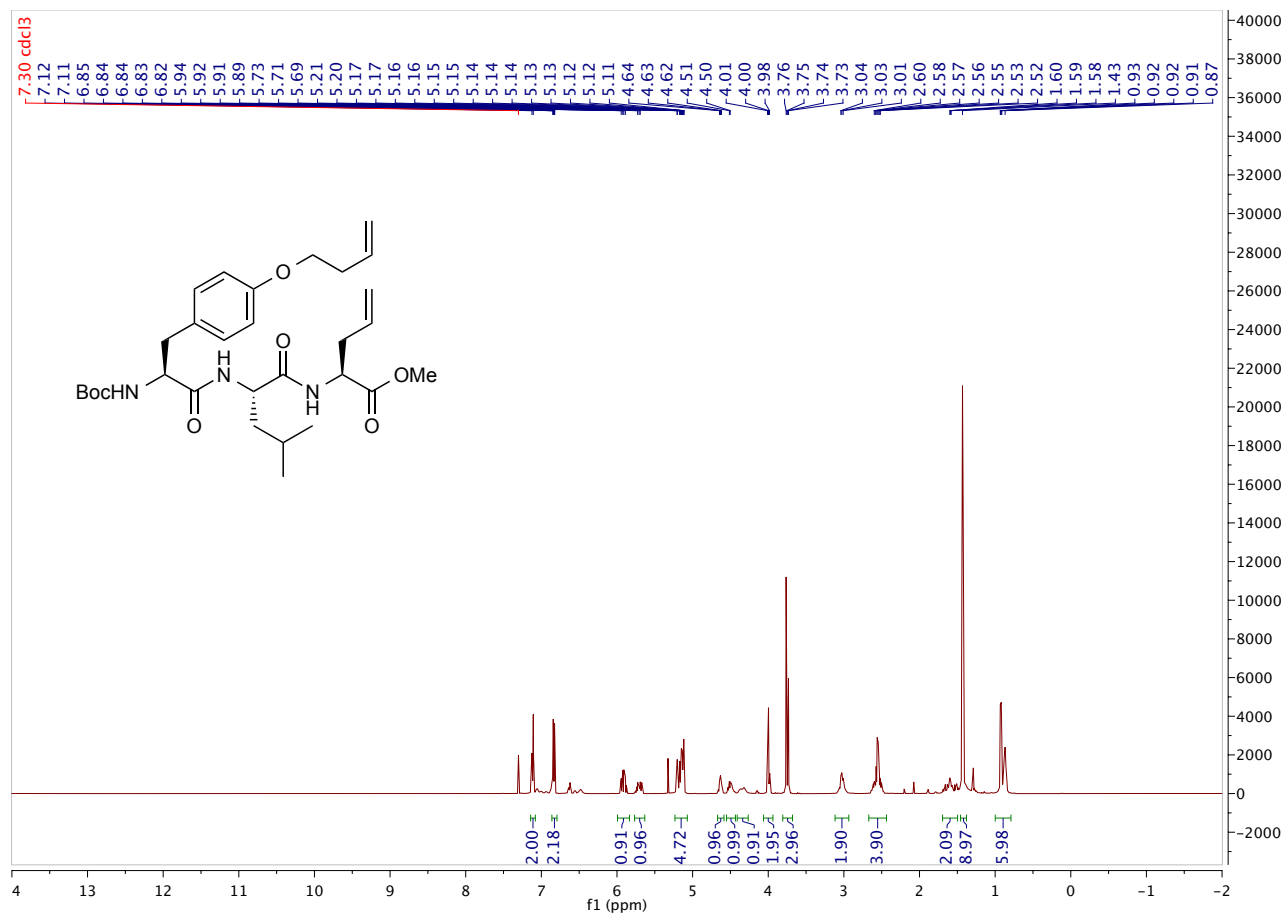



$^{13}\text{C}$  NMR (126 MHz,  $\text{CDCl}_3$ ) spectrum of compound **8b**

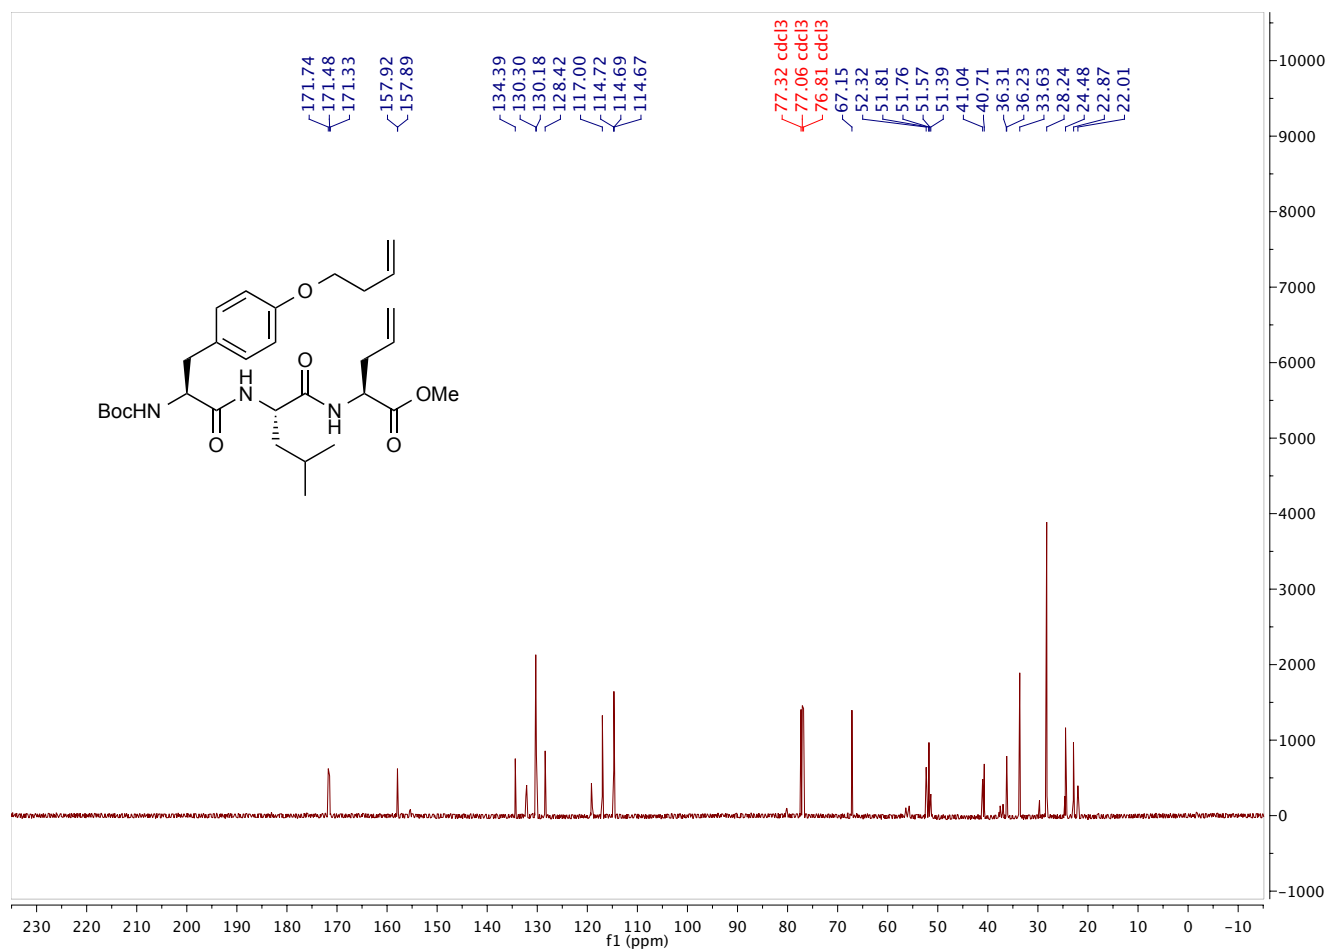

$^1\text{H}$  NMR (500 MHz,  $\text{CDCl}_3$ ) spectrum of compound **8c**

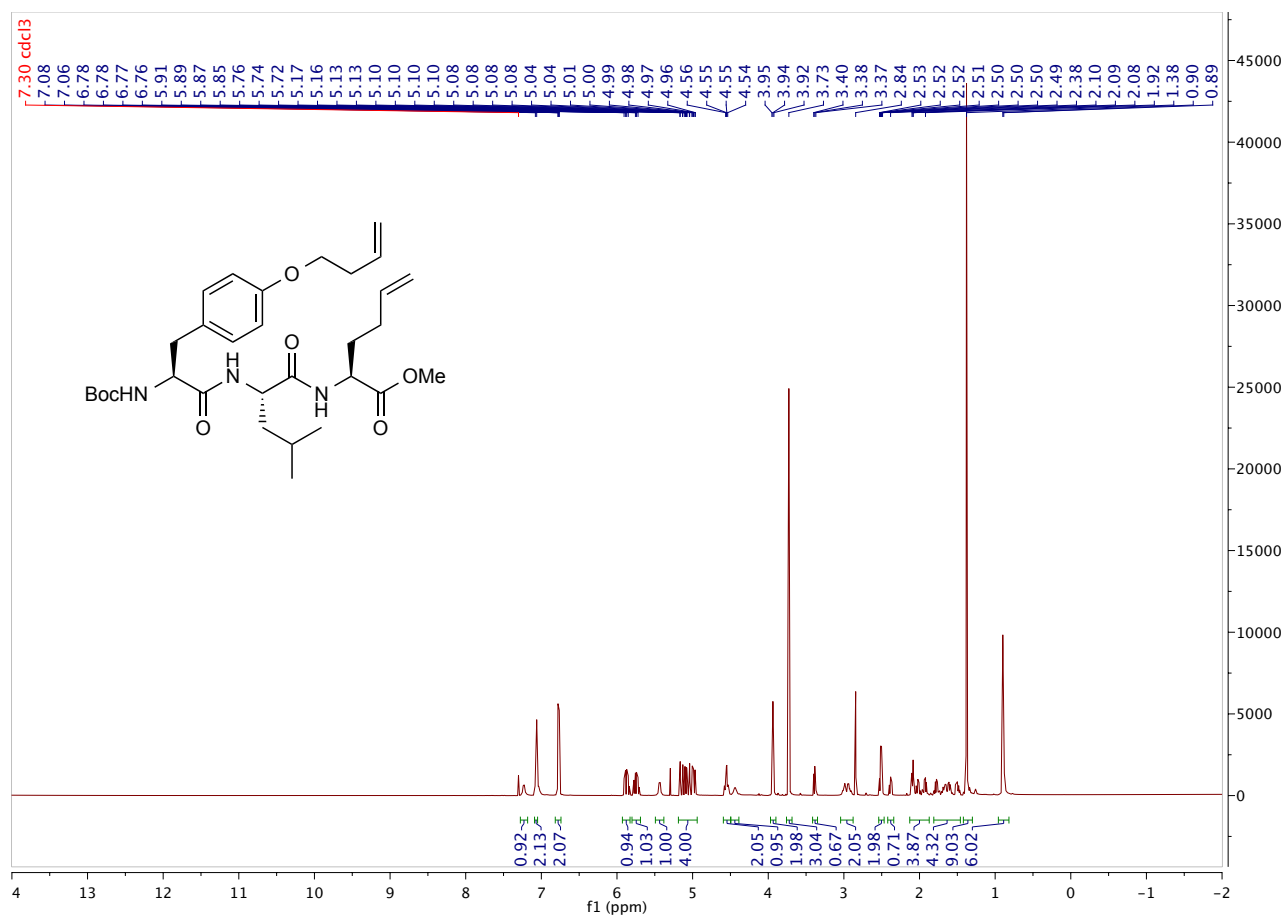

$^{13}\text{C}$  NMR (126 MHz,  $\text{CDCl}_3$ ) spectrum of compound **8c**

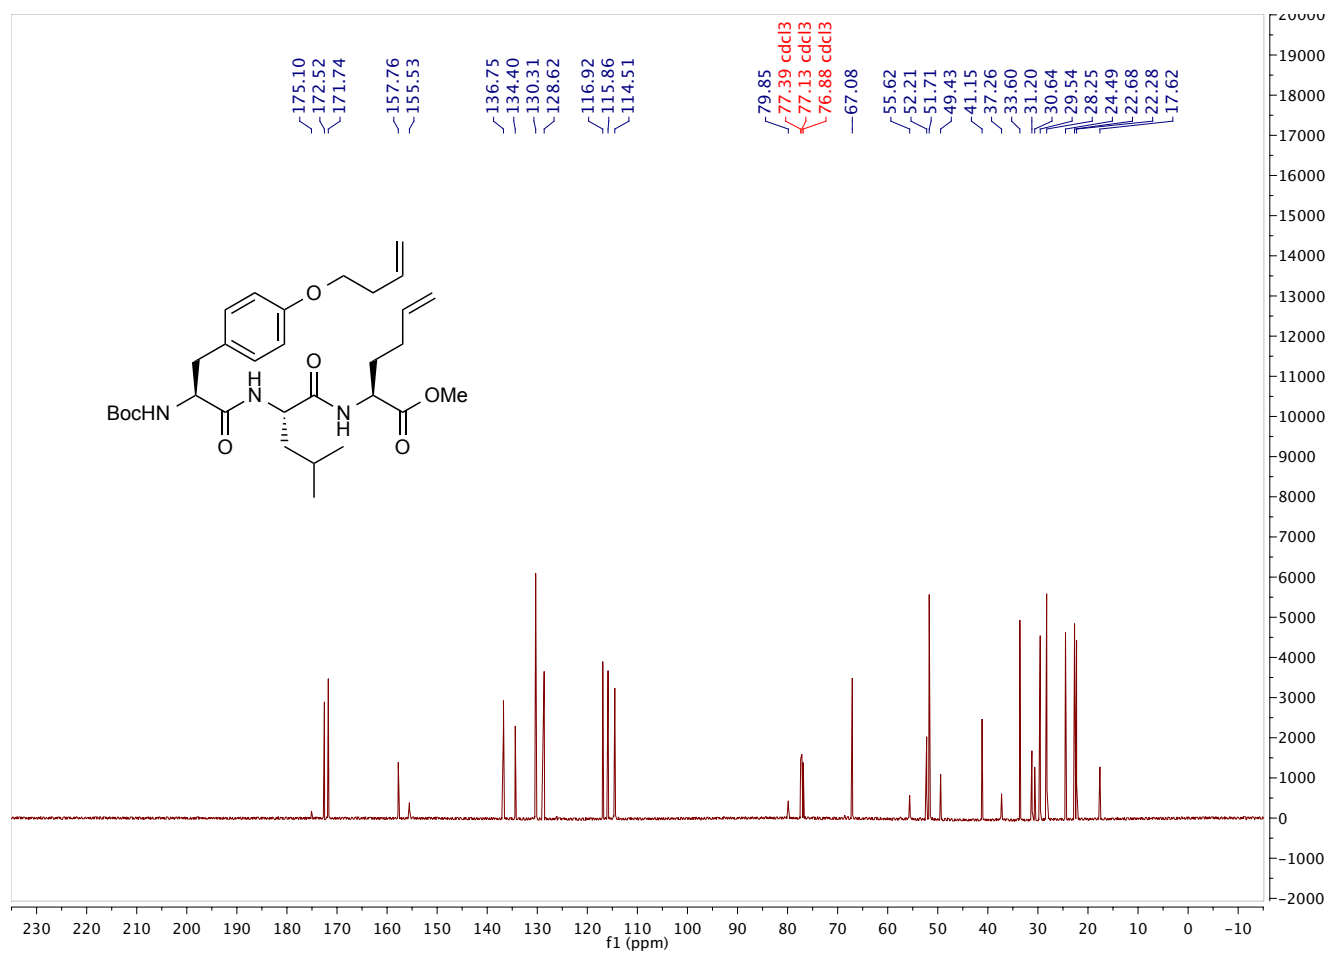

$^1\text{H}$  NMR (500 MHz,  $\text{CDCl}_3$ ) spectrum of compound **10**

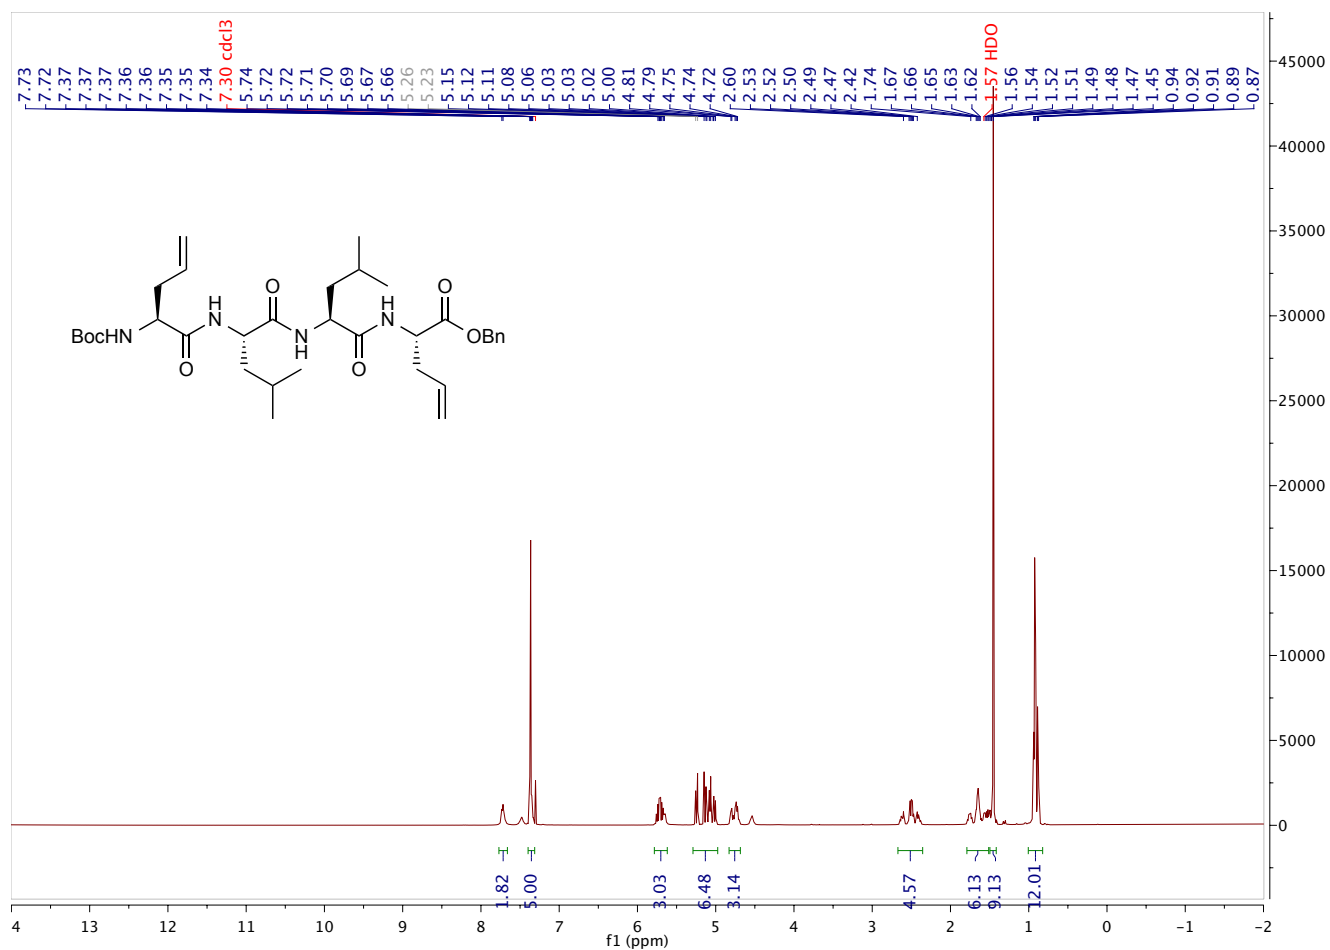

$^{13}\text{C}$  NMR (126 MHz,  $\text{CDCl}_3$ ) spectrum of compound **10**

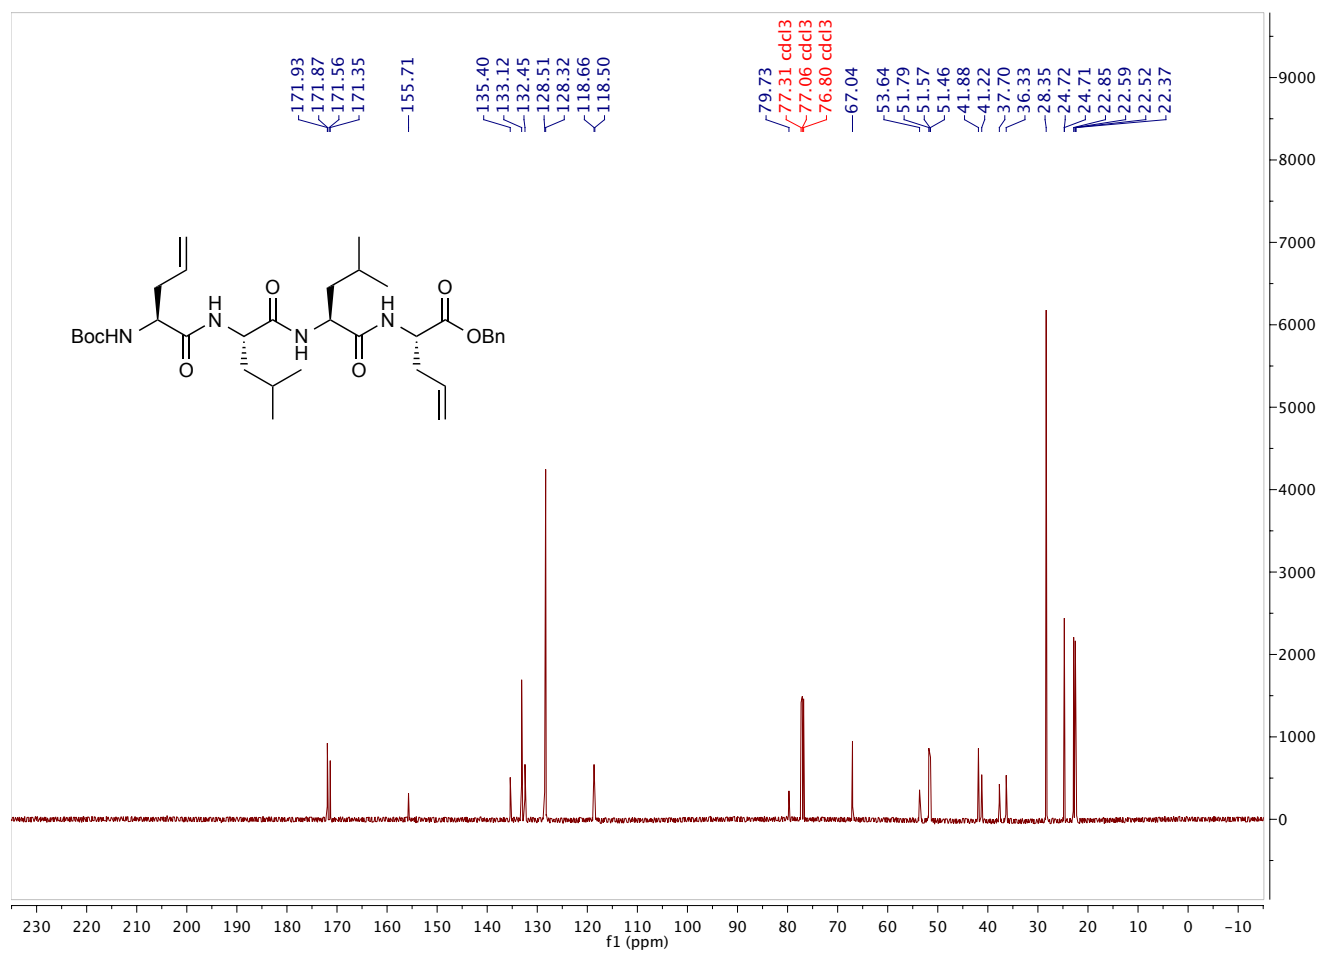

$^1\text{H}$  NMR (500 MHz,  $\text{CDCl}_3$ ) spectrum of compound **11**

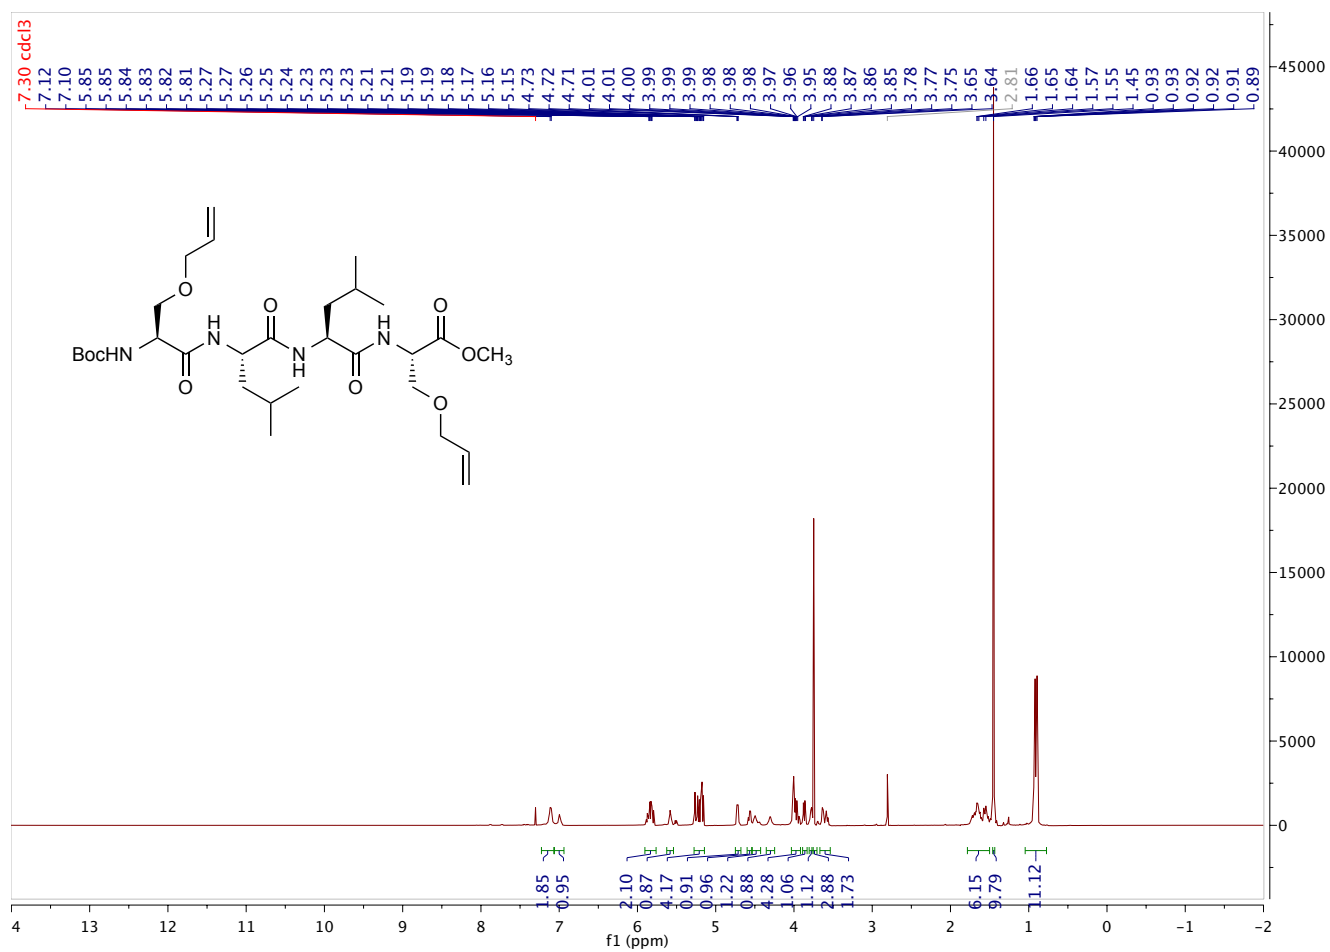

$^{13}\text{C}$  NMR (126 MHz,  $\text{CDCl}_3$ ) spectrum of compound **11**

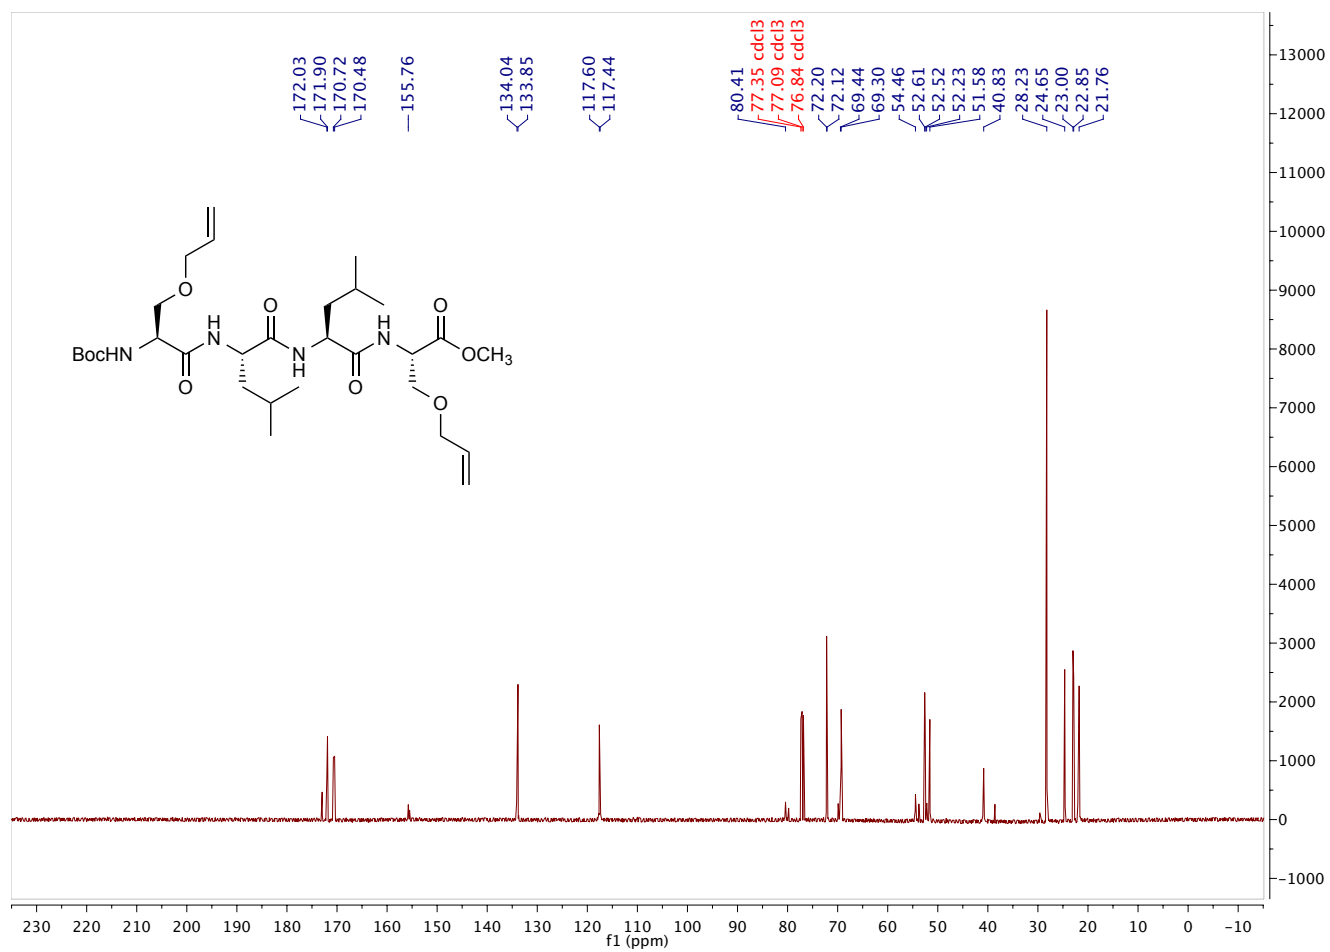

$^1\text{H}$  NMR (500 MHz,  $\text{CDCl}_3$ ) spectrum of compound **12**

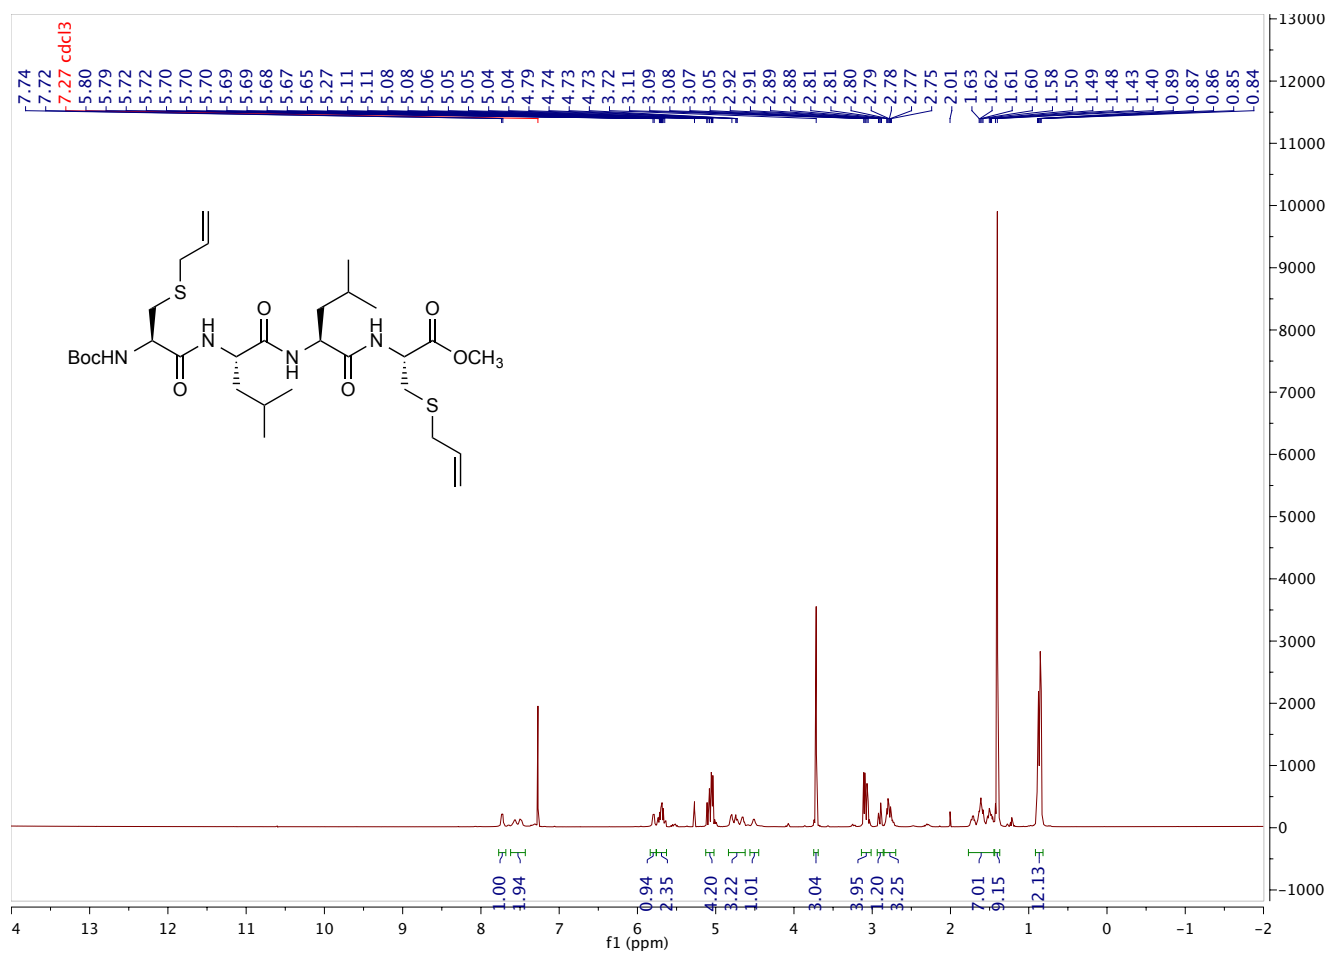



$^{13}\text{C}$  NMR (126 MHz,  $\text{CDCl}_3$ ) spectrum of compound **12**

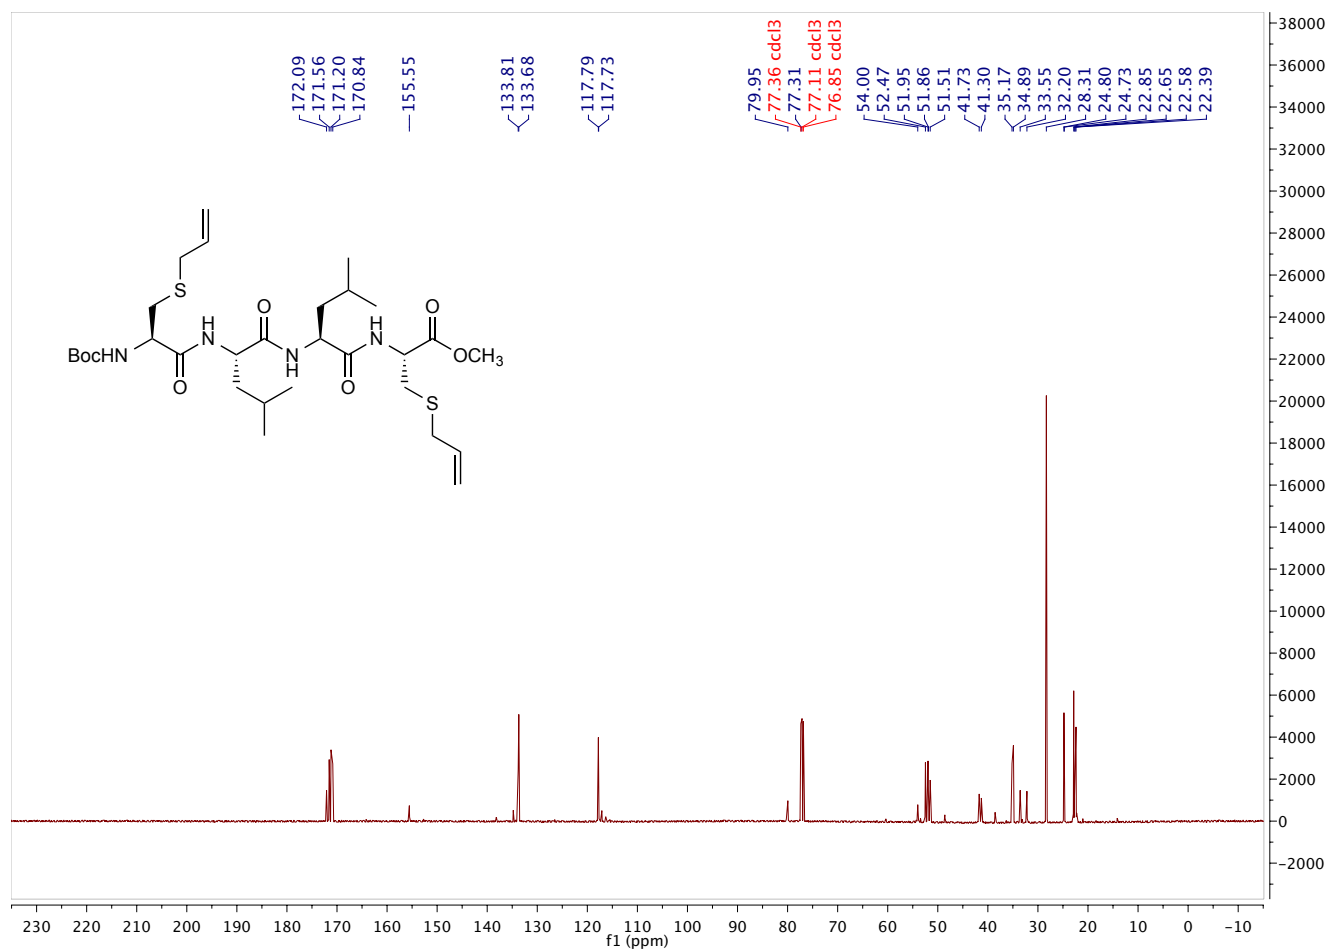



$^{13}\text{C}$  NMR (126 MHz,  $\text{CDCl}_3$ ) spectrum of compound **13**

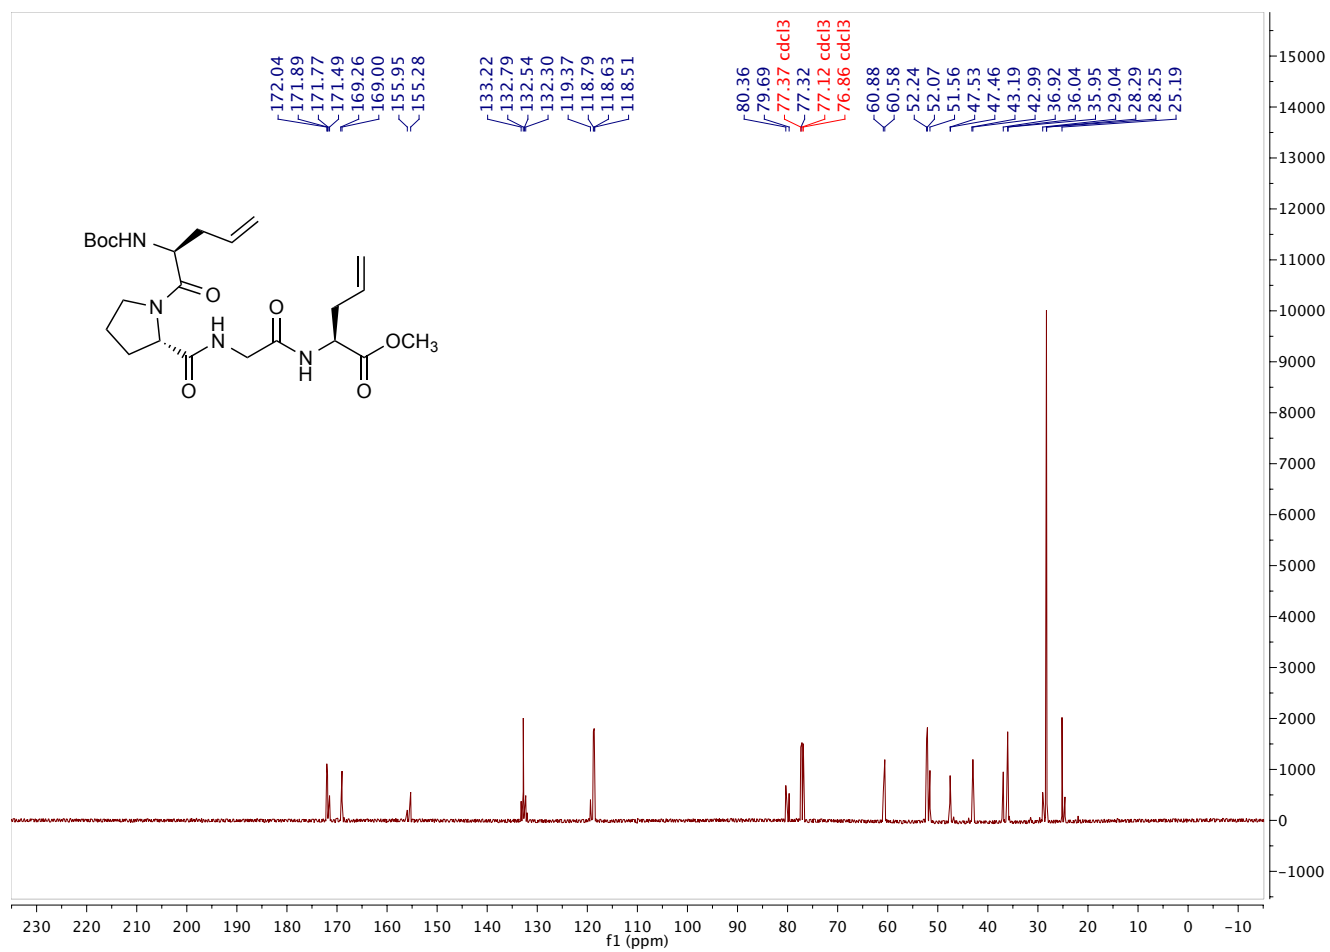

$^1\text{H}$  NMR (500 MHz,  $\text{CDCl}_3$ ) spectrum of compound **14**

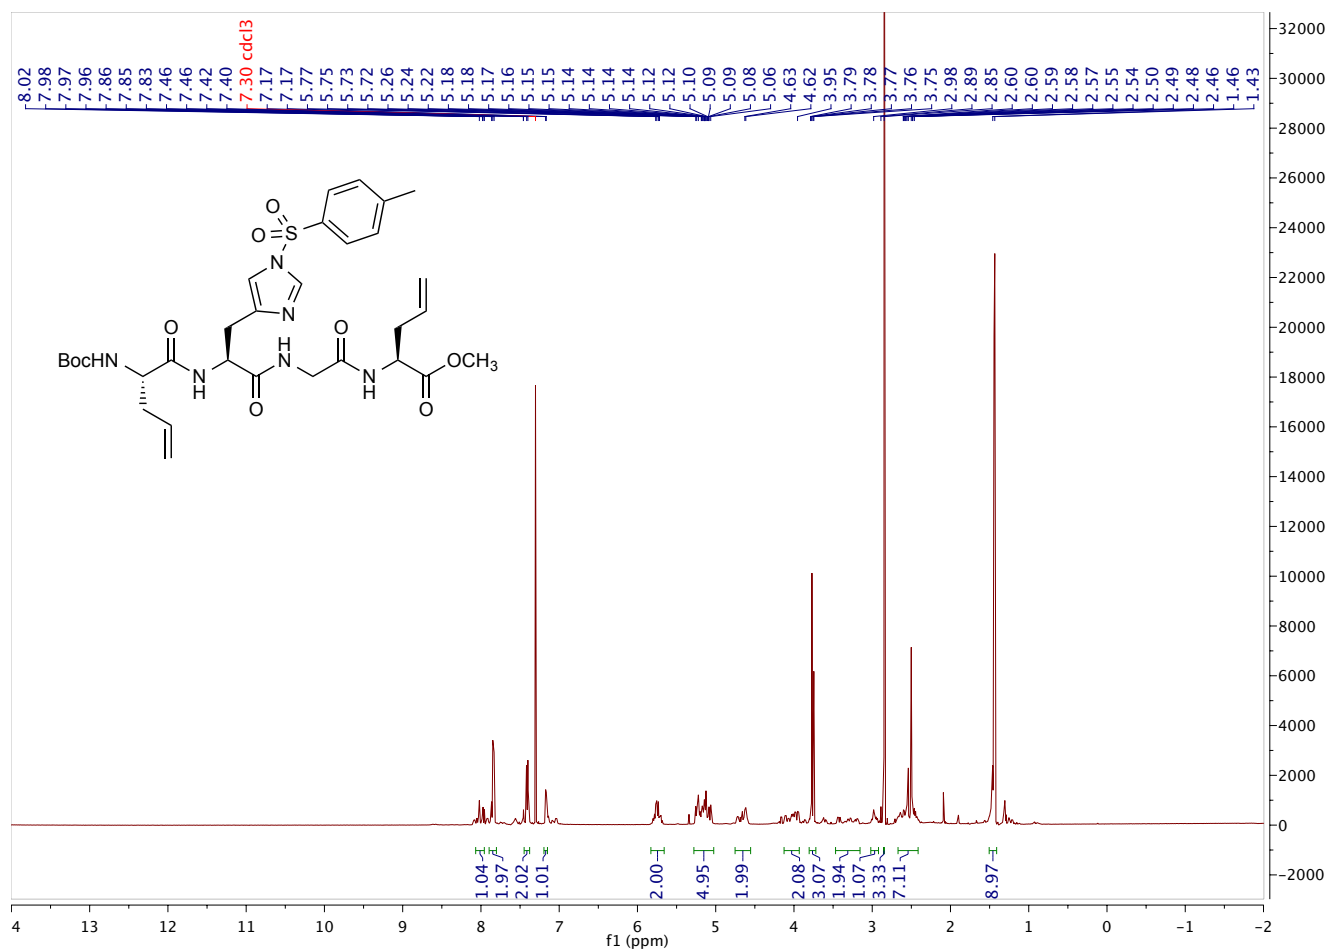

$^{13}\text{C}$  NMR (126 MHz,  $\text{CDCl}_3$ ) spectrum of compound **14**

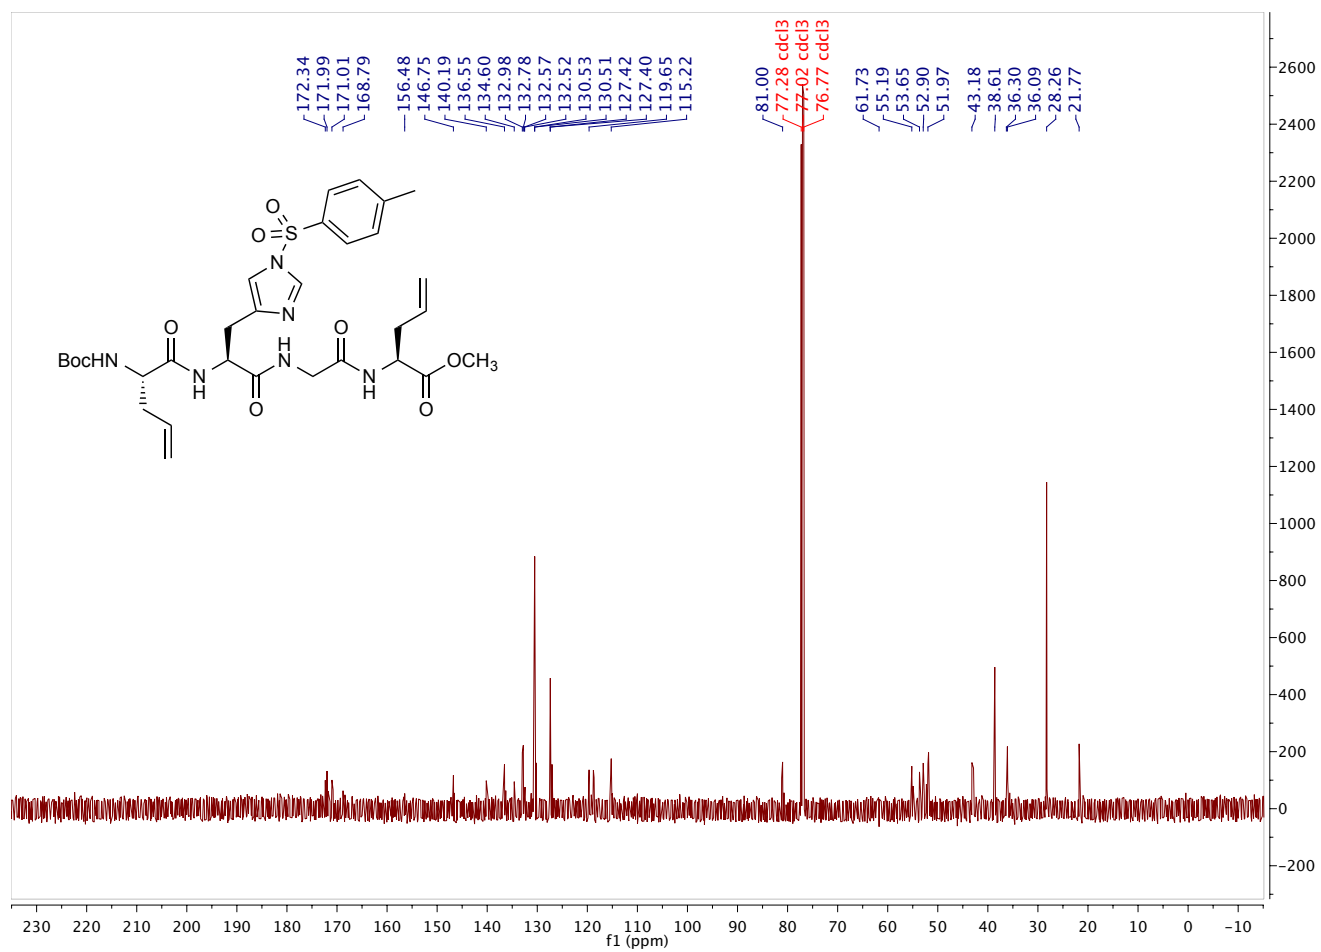

$^1\text{H}$  NMR (500 MHz,  $\text{CDCl}_3$ ) spectrum of compound **9a**

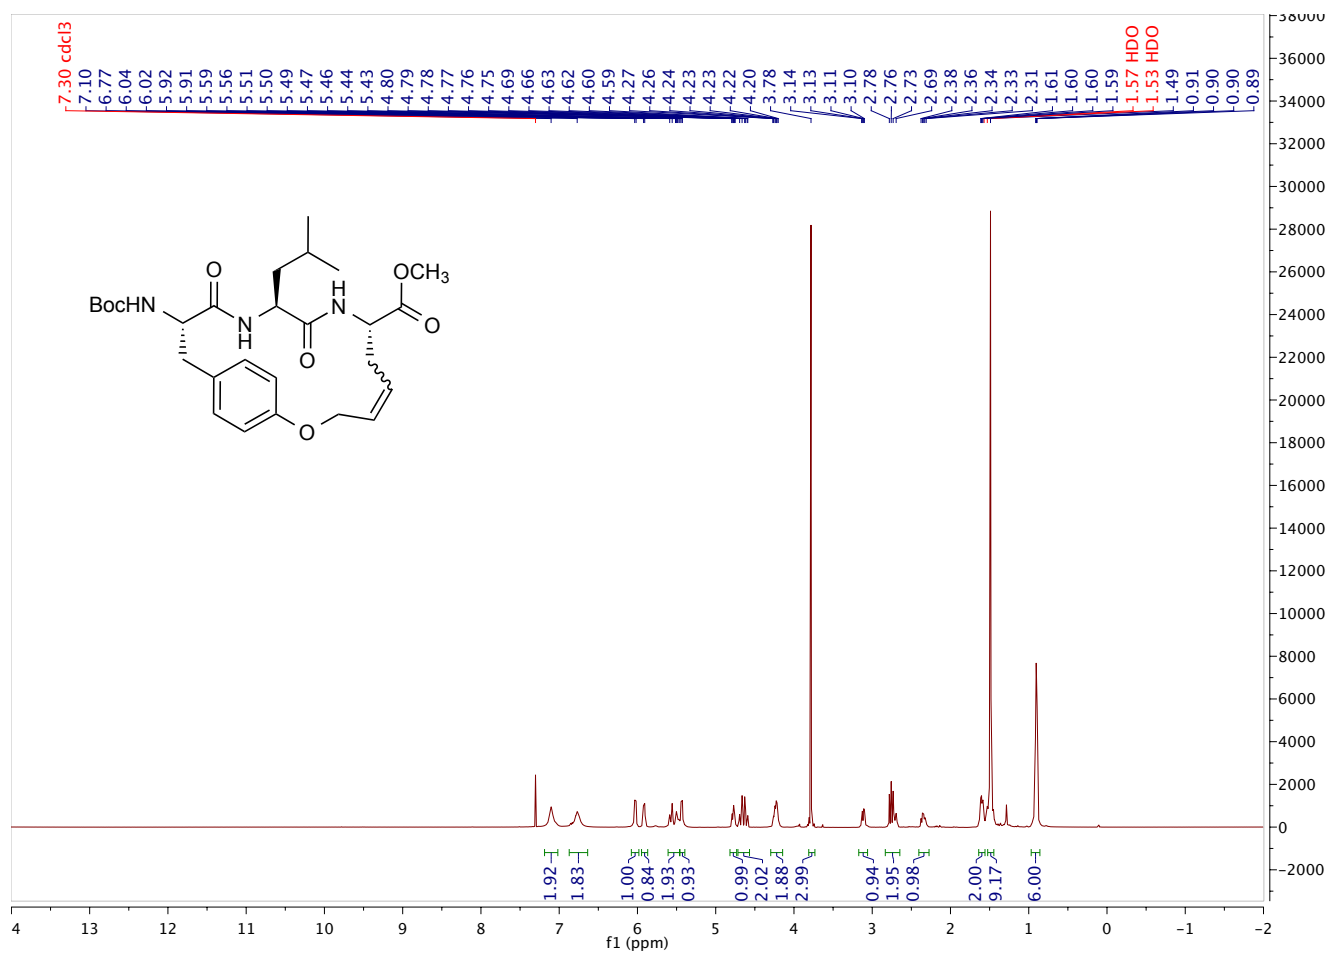

<sup>13</sup>C NMR (126 MHz, CDCl<sub>3</sub>) spectrum of compound **9a**

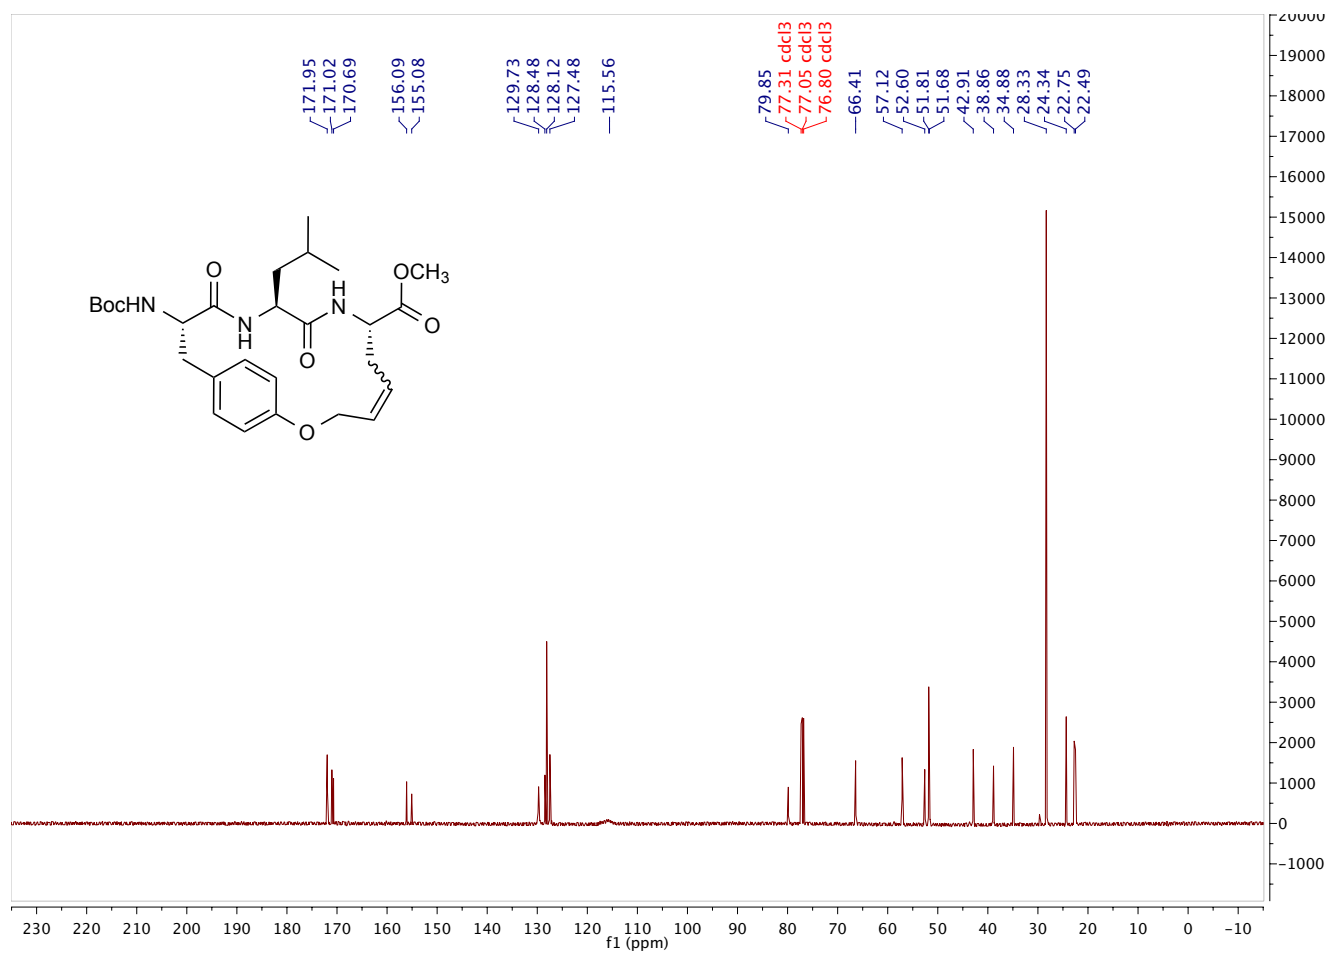





$^{13}\text{C}$  NMR (126 MHz,  $\text{CDCl}_3$ ) spectrum of compound **9b**

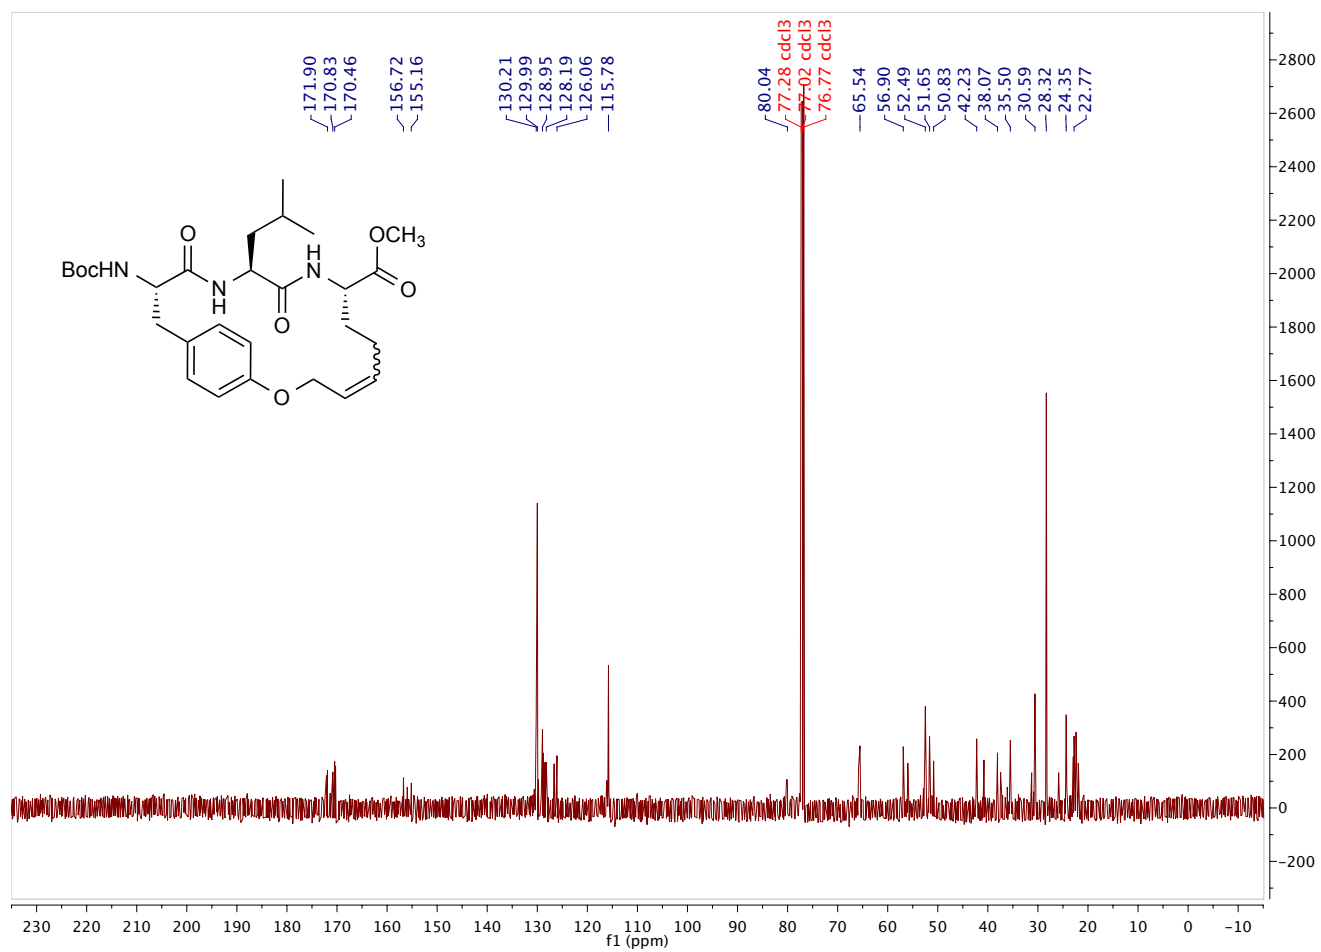

# H NMR (500 MHz, CDCl<sub>3</sub>) spectrum of compound 9c

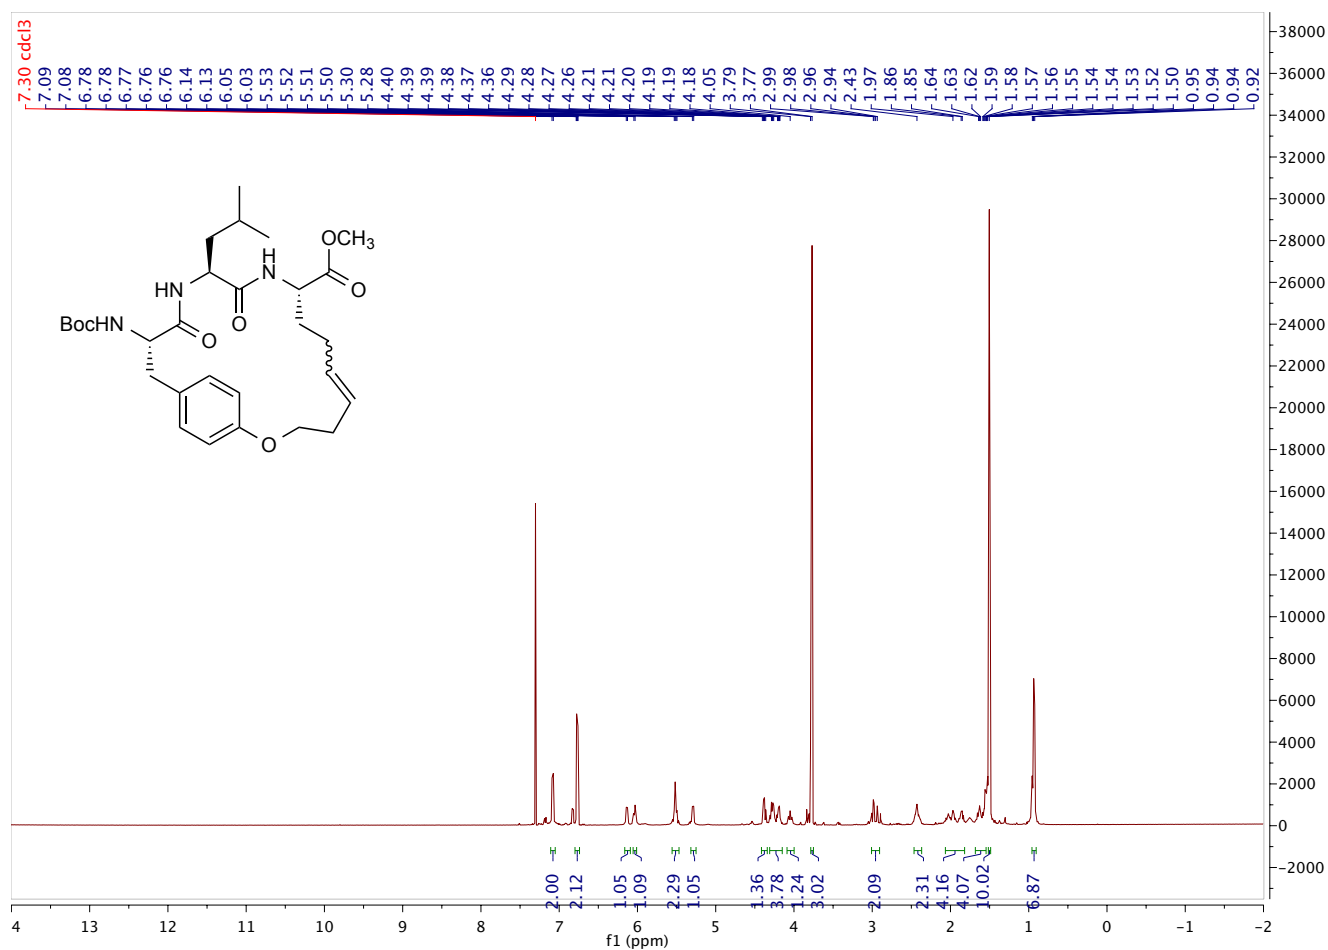

$^{13}\text{C}$  NMR (126 MHz,  $\text{CDCl}_3$ ) spectrum of compound **9c**

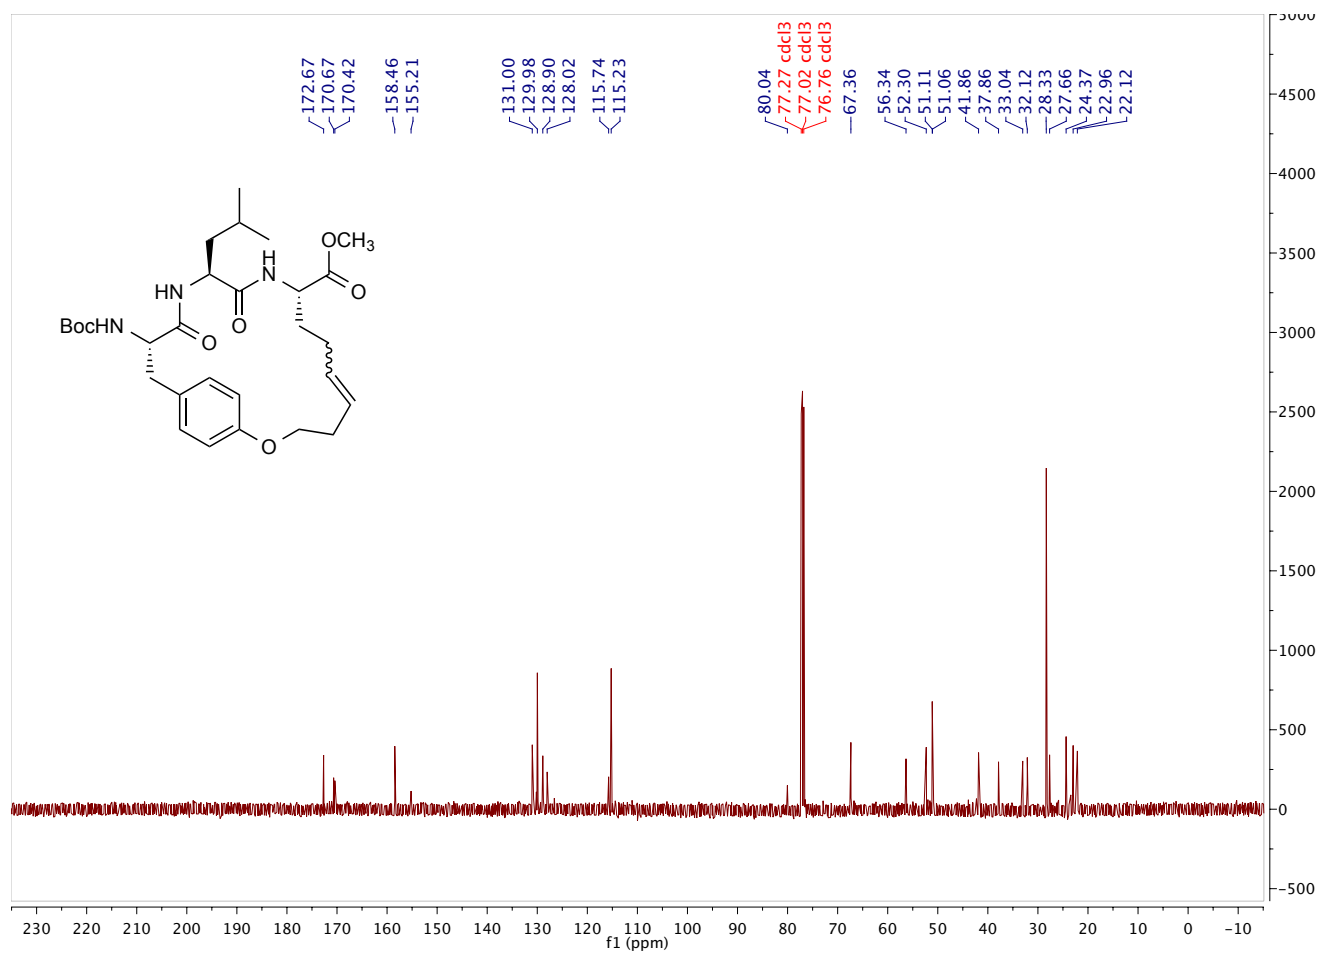

$^1\text{H}$  NMR (500 MHz,  $\text{CDCl}_3$ ) spectrum of compound **15**

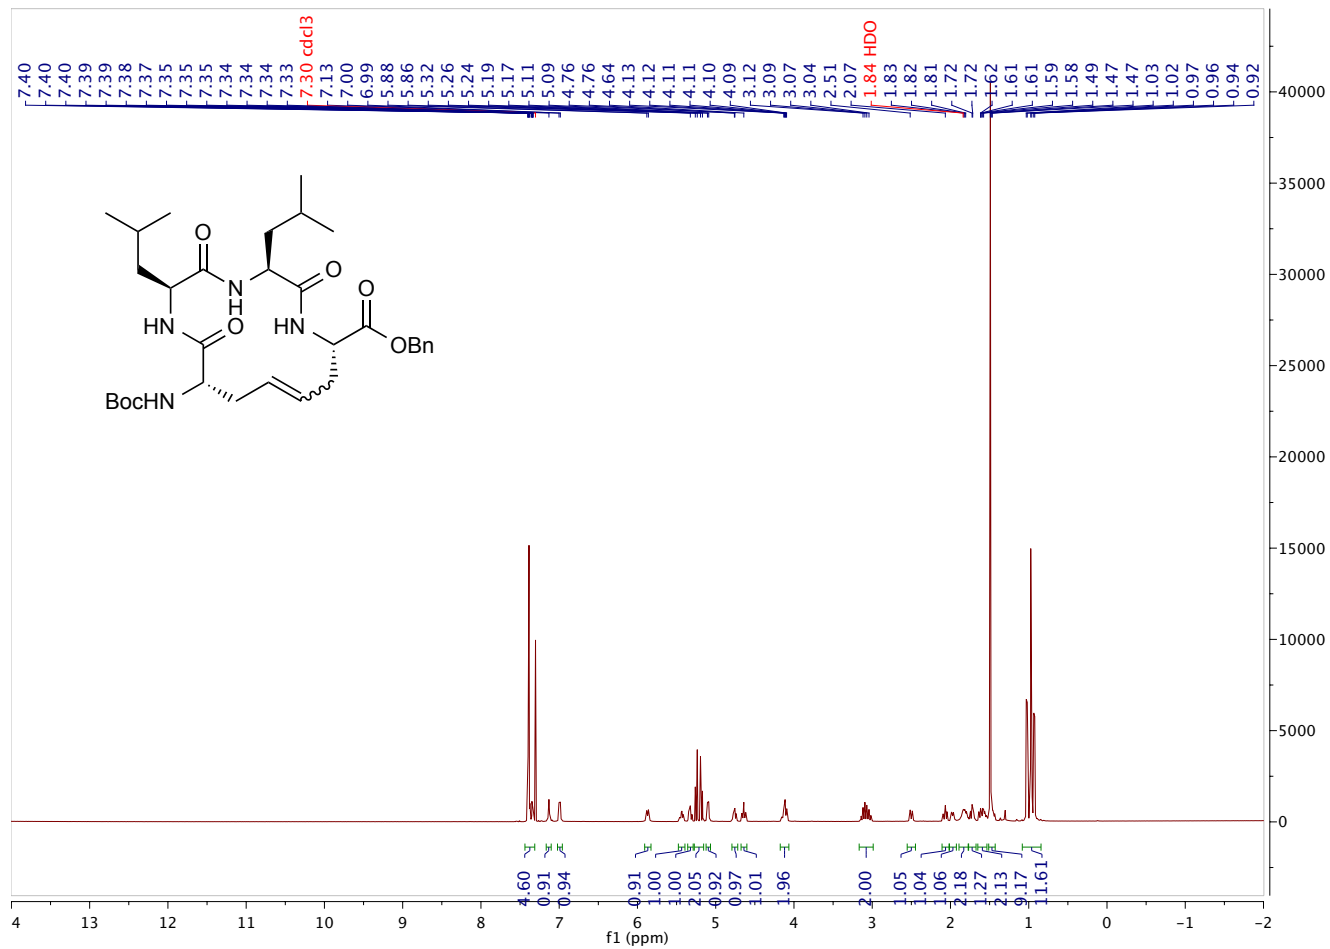

$^{13}\text{C}$  NMR (126 MHz,  $\text{CDCl}_3$ ) spectrum of compound **15**

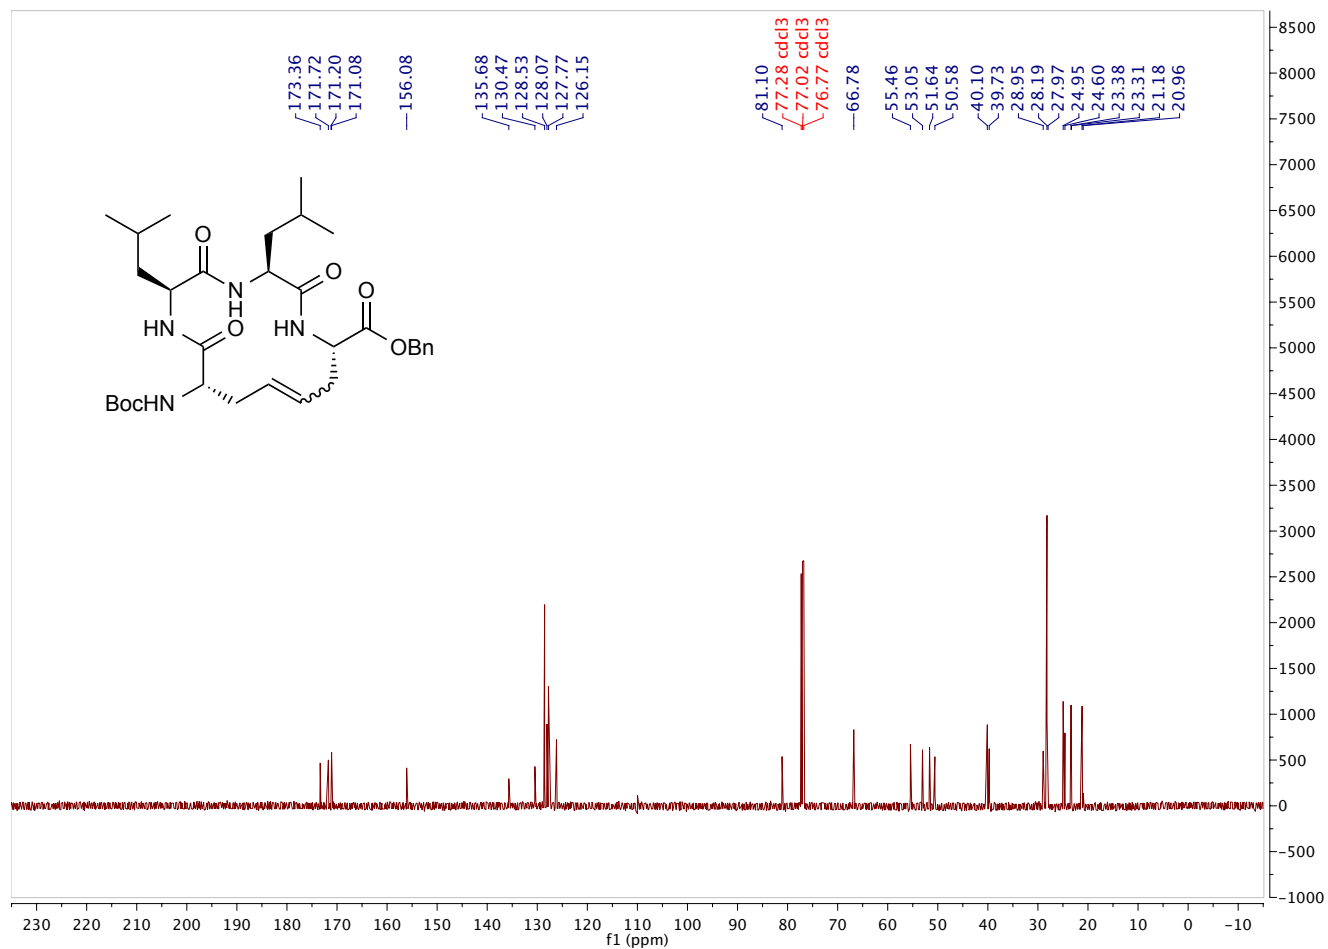

$^1\text{H}$  NMR (500 MHz,  $\text{CDCl}_3$ ) spectrum of compound **16**

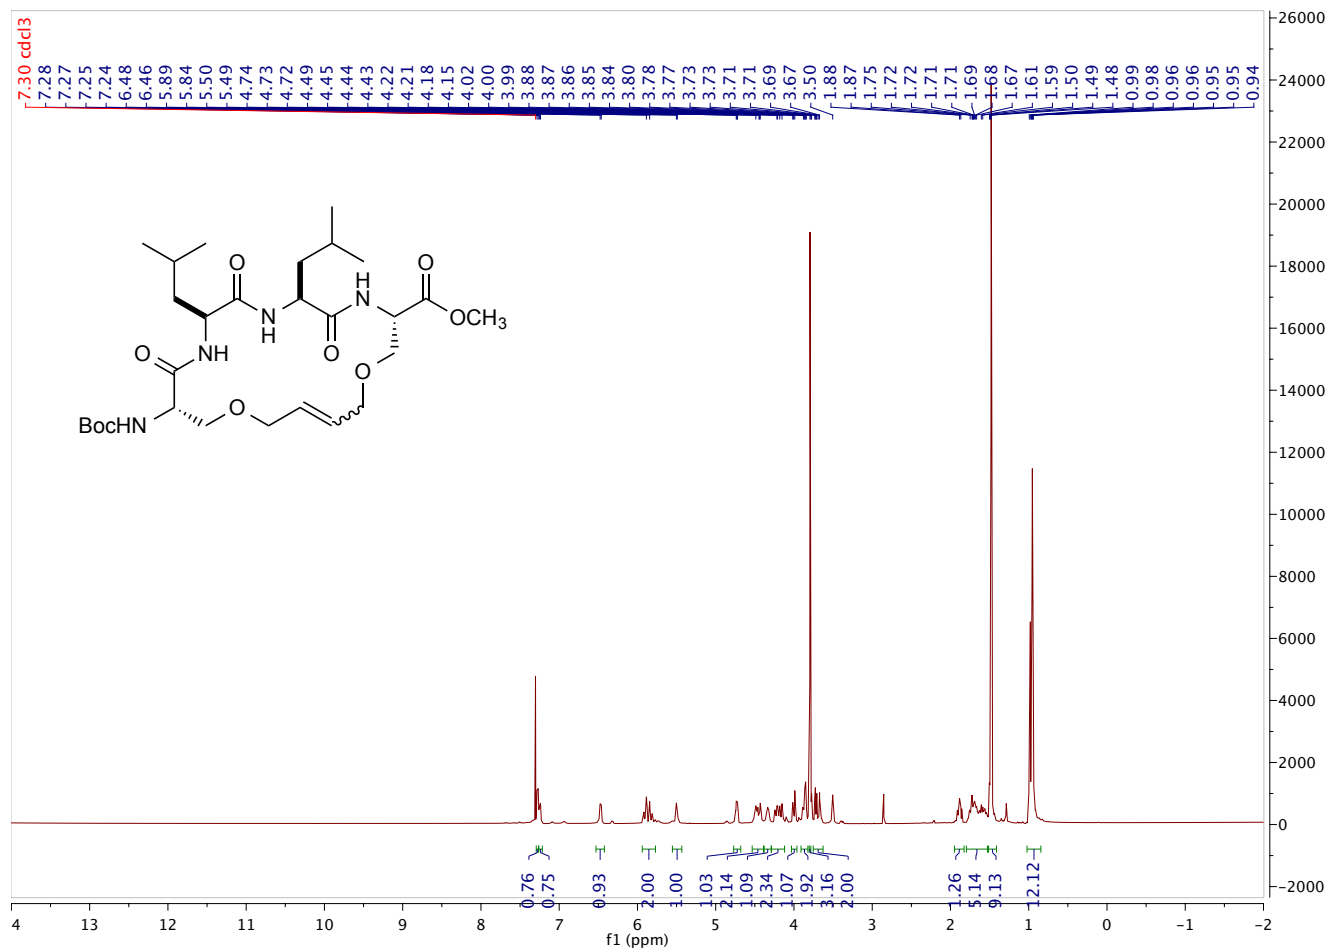

$^{13}\text{C}$  NMR (126 MHz,  $\text{CDCl}_3$ ) spectrum of compound **16**

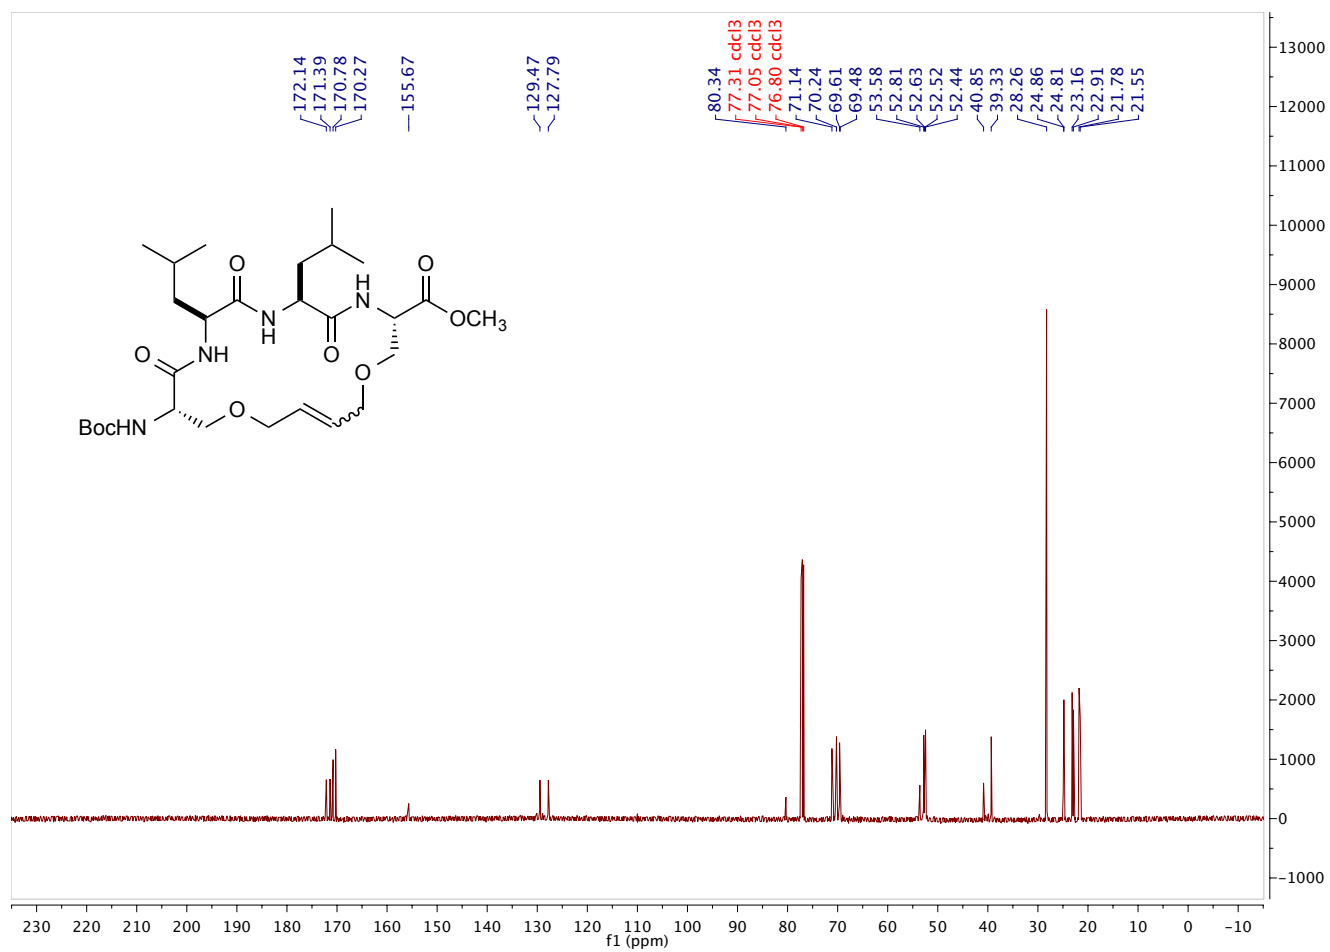

<sup>1</sup>H NMR (500 MHz, CDCl<sub>3</sub>) spectrum of compound **17**

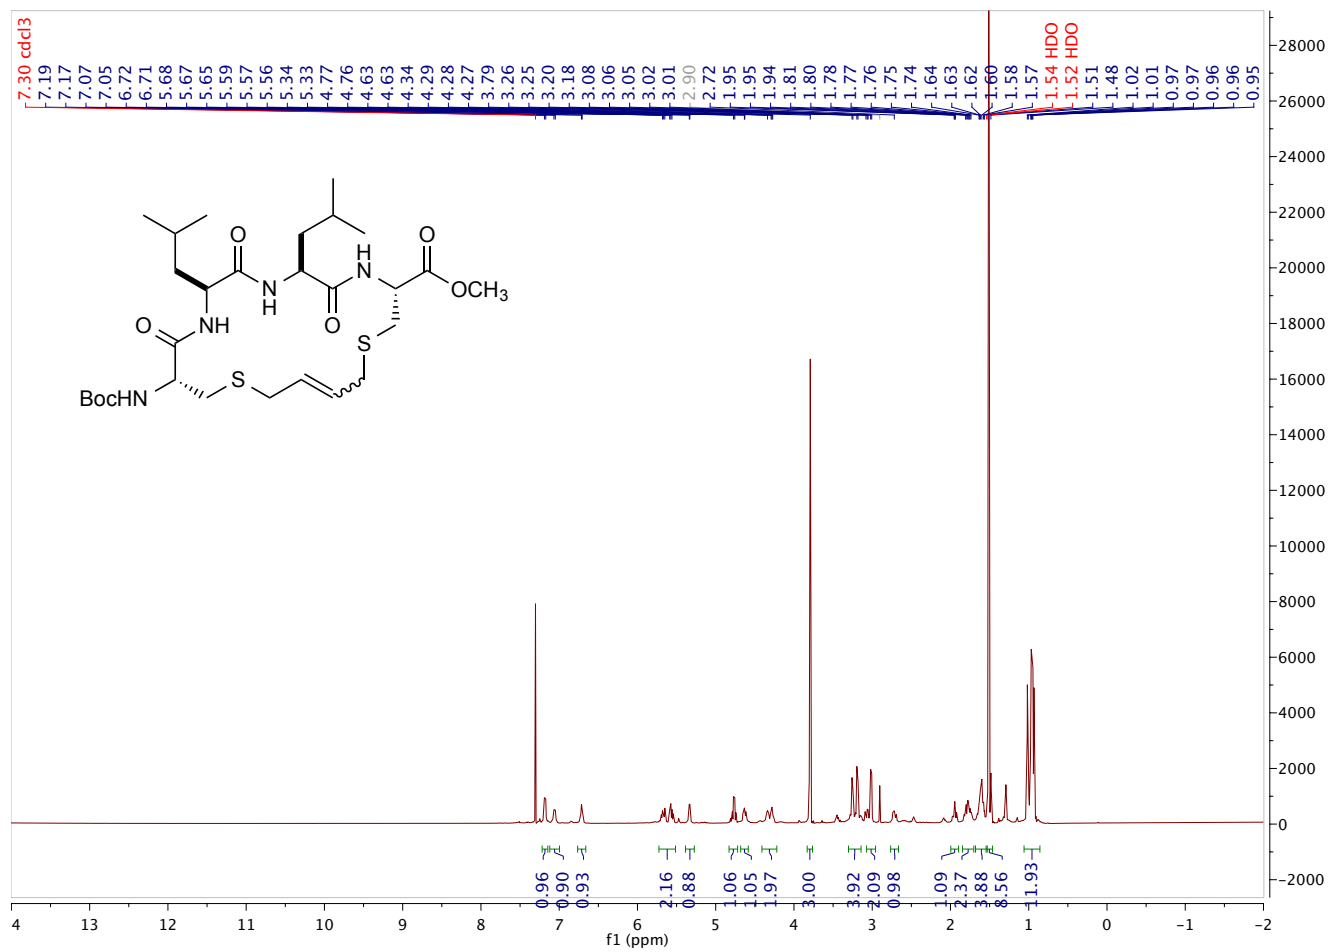



$^{13}\text{C}$  NMR (126 MHz,  $\text{CDCl}_3$ ) spectrum of compound **17**

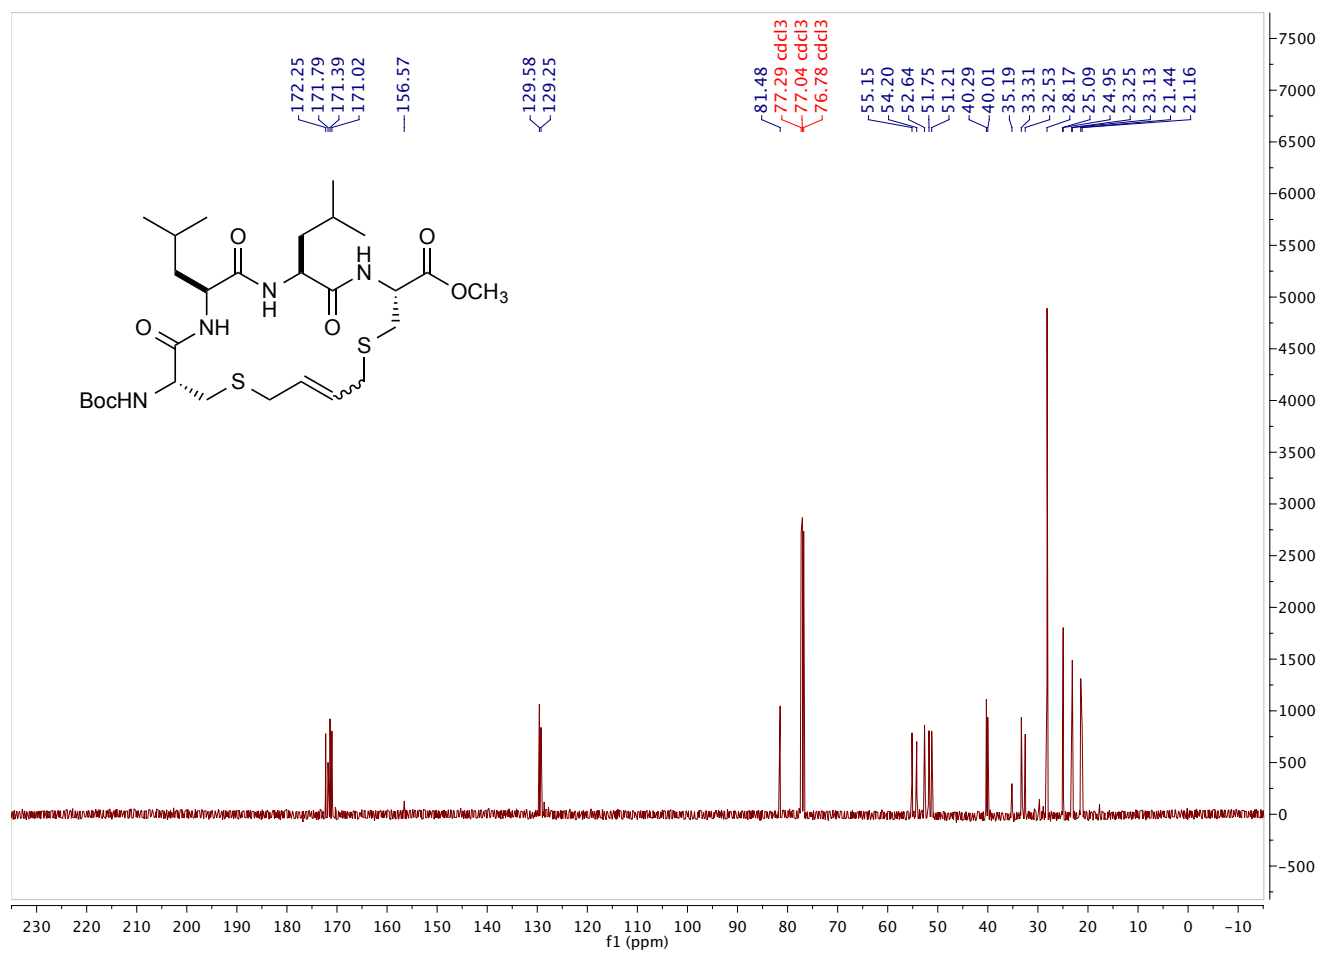

$^1\text{H}$  NMR (500 MHz,  $\text{CDCl}_3$ ) spectrum of compound **18**

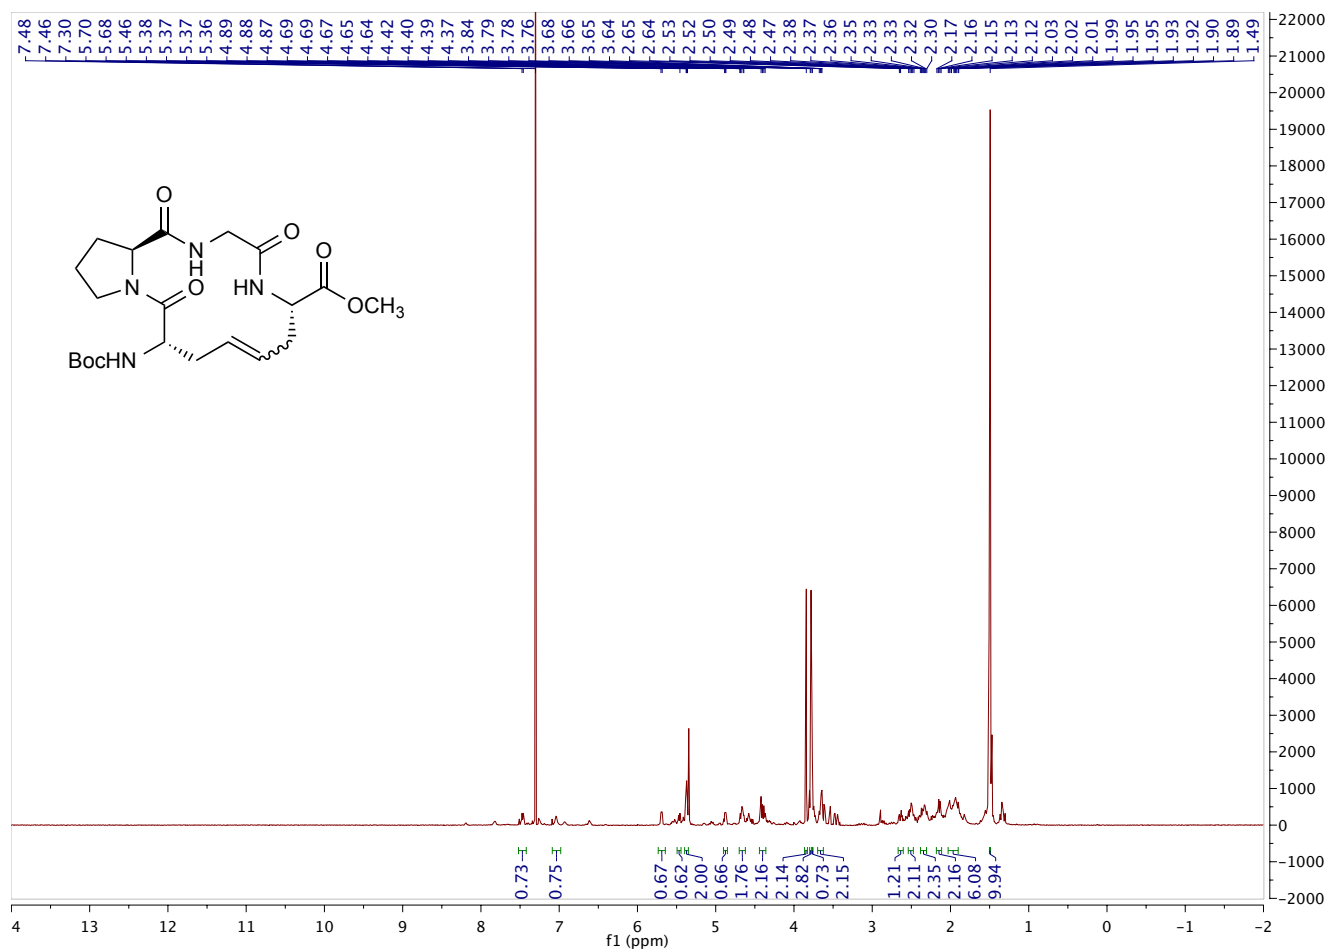

$^{13}\text{C}$  NMR (126 MHz,  $\text{CDCl}_3$ ) spectrum of compound **18**

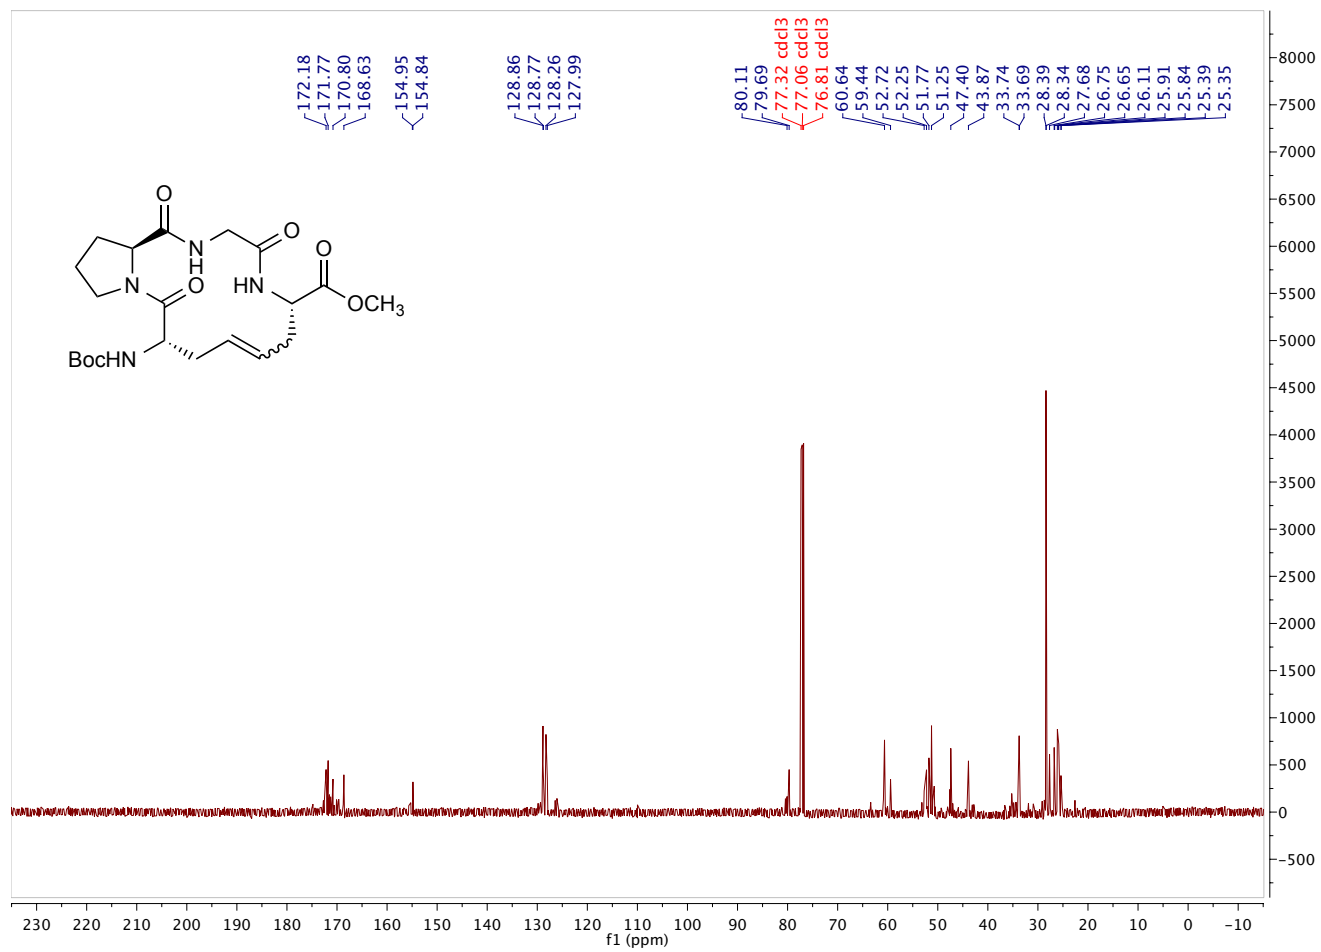

Supplement: SC-006-C5SC01507C-s001.pdf [file SC-006-C5SC01507C-s001.pdf]
